# Supplementary material for: Genome Anchored QTLs for Biomass Productivity in Hybrid Populus Grown under Contrasting Environments
Source: PLoS One. 2013 Jan 29;8(1):e54468. doi: 10.1371/journal.pone.0054468 (PMC3558514; doi:10.1371/journal.pone.0054468)
Supplement: Table S2 — Populus gene models within QTL intervals identified for stem height and diameter in an F2 pedigree. (XLSX) [file pone.0054468.s002.xlsx]

## Sheet: BM-1
Table S2 Populus gene models within QTL intervals identified for stem height and diameter in an F2 pedigree
Gene_Name	Chromosome_Name	Gene_Start	Gene_End	PFAM_Description	Description
POPTR_0001s11970	scaffold_1	9302892	9303920
POPTR_0001s11980	scaffold_1	9303344	9303604
POPTR_0001s11990	scaffold_1	9304464	9305965
POPTR_0001s12000	scaffold_1	9309740	9310526
POPTR_0001s12010	scaffold_1	9311394	9313425
POPTR_0001s12020	scaffold_1	9332723	9333818
POPTR_0001s12030	scaffold_1	9338496	9339954
POPTR_0001s12040	scaffold_1	9342129	9347248
POPTR_0001s12050	scaffold_1	9352724	9358556
POPTR_0001s12070	scaffold_1	9361617	9362704
POPTR_0001s12080	scaffold_1	9365080	9365536
POPTR_0001s12090	scaffold_1	9374506	9376069
POPTR_0001s12100	scaffold_1	9381826	9383439
POPTR_0001s12110	scaffold_1	9386955	9387682
POPTR_0001s12120	scaffold_1	9390527	9393753
POPTR_0001s12140	scaffold_1	9396529	9402031
POPTR_0001s12150	scaffold_1	9404050	9408646
POPTR_0001s12160	scaffold_1	9415670	9418781	Uncharacterized conserved protein
POPTR_0001s12170	scaffold_1	9428061	9432685	Mitochondrial matrix Mmp37
POPTR_0001s12180	scaffold_1	9434425	9436132	Amino acid transporters
POPTR_0001s12190	scaffold_1	9437277	9441886	PPR repeat
POPTR_0001s12200	scaffold_1	9445814	9448570	PPR repeat	similar to pentatricopeptide (PPR) repeat-containing protein; [ ortholog of At3g57430,]
POPTR_0001s12210	scaffold_1	9451904	9455528	PPR repeat
POPTR_0001s12220	scaffold_1	9456726	9462618	PA domain
POPTR_0001s12230	scaffold_1	9472939	9474925	FKBP-type peptidyl-prolyl cis-trans isomerase	similar to FKBP-type peptidyl-prolyl cis-trans isomerase 3; similar to chloroplast precursor (EC 5.2.1.8) (PPIase) (Rotamase) (AtFKBP13) (FK506 binding protein 1).; [ co-ortholog (1of2) of At5g45680, ]
POPTR_0001s12240	scaffold_1	9484230	9485368	Myb-like DNA-binding domain
POPTR_0001s12250	scaffold_1	9487449	9489747
POPTR_0001s12260	scaffold_1	9490757	9496628	WD domain, G-beta repeat
POPTR_0001s12270	scaffold_1	9501583	9502952
POPTR_0001s12275	scaffold_1	9504280	9505123	Peroxidase
POPTR_0001s12290	scaffold_1	9515151	9518996	Leucine rich repeat N-terminal domain	similar to leucine-rich repeat transmembrane protein kinase; putative; similar to Cf-2.2; similar to Lycopersicon pimpinellifolium; similar to PIR:T10515; [ co-ortholog (2of2) of At4g20140, ]
POPTR_0001s12300	scaffold_1	9521438	9522146
POPTR_0001s12310	scaffold_1	9525661	9530126	similar to ubiquitin-protein ligase-related; weakly similar to Ubiquitin-protein ligase E3 Mdm2 (EC 6.3.2.-) (p53-binding protein Mdm2) (Oncoprotein Mdm2) (Double minute 2 protein) (Swiss-Prot:P23804) (Mus musculus); [ co-ortholog (2of2) of At1g30860, At2	similar to ubiquitin-protein ligase-related; weakly similar to Ubiquitin-protein ligase E3 Mdm2 (EC 6.3.2.-) (p53-binding protein Mdm2) (Oncoprotein Mdm2) (Double minute 2 protein) (Swiss-Prot:P23804) (Mus musculus); [ co-ortholog (2of2) of At1g30860, At2
POPTR_0001s12320	scaffold_1	9543124	9545749	Methyladenine glycosylase
POPTR_0001s12330	scaffold_1	9554404	9557240	Domain of unknown function
POPTR_0001s12340	scaffold_1	9560609	9560896
POPTR_0001s12350	scaffold_1	9566689	9570209	GDSL-like Lipase/Acylhydrolase	similar to early nodulin 8 precursor - alfalfa. [ORG:Medicago sativa]; [ co-ortholog (3of5) of AAP37470, AAA91034, Q7Y1X1, AAL68833, T52338, AAC26810, AAB41547, AAL68831, S59943, AAL68830, AAL68832, ]
POPTR_0001s12360	scaffold_1	9571469	9575619
POPTR_0001s12370	scaffold_1	9584353	9585390	EamA-like transporter family	similar to purine permease-related; similar to low similarity to purine permease (Arabidopsis thaliana) GI:7620007; similar to DUF250; Member of a family of protein; similar to a purine; [ co-ortholog (1of2) of At1g30840, ]
POPTR_0001s12380	scaffold_1	9589613	9594505	MCM2/3/5 family
POPTR_0001s12390	scaffold_1	9605677	9607151	DREPP plasma membrane polypeptide
POPTR_0001s12400	scaffold_1	9613662	9619293	Bromodomain
POPTR_0001s12410	scaffold_1	9619804	9622165	Methyltransferase domain
POPTR_0001s12420	scaffold_1	9630973	9635486	Leucine rich repeat N-terminal domain	similar to leucine-rich repeat transmembrane protein kinase; putative; similar to CLAVATA1 receptor kinase; similar to Arabidopsis th.; similar to PATX:G2160756; [ co-ortholog (2of2) of At4g20270, ]
POPTR_0001s12430	scaffold_1	9642273	9647599	hTAFII28-like protein conserved region	transcription initiation factor IID (TFIID) 28 kDa subunit (TAFII-28) family protein; similar to SP|Q15544|Transcription initiation factor TFIID 28 kDa subunit TAFII (28-TAFII28) (TFIID) (subunit p30 beta-{Homo) {sapiens} ; [ co-ortholog (1of2) of At1g200
POPTR_0001s12440	scaffold_1	9648729	9653488	Protein of unknown function (DUF1639)
POPTR_0001s12450	scaffold_1	9655965	9662462	Arp2/3 complex, 34 kD subunit p34-Arc
POPTR_0001s12460	scaffold_1	9666845	9667941	peptidase M50 family protein; sterol-regulatory element binding protein (SREBP) site 2 protease family protein; weakly similar to SP|O54862|Membrane bound-transcription factor site 2 protease EC (3 4.24.Sterol.-) (regulatory-element binding-proteins int ;	peptidase M50 family protein; sterol-regulatory element binding protein (SREBP) site 2 protease family protein; weakly similar to SP|O54862|Membrane bound-transcription factor site 2 protease EC (3 4.24.Sterol.-) (regulatory-element binding-proteins int ;
POPTR_0001s12470	scaffold_1	9687152	9692901	CTP synthase N-terminus	similar to CTP synthase; putative; similar to UTP--ammonia ligase; putative; similar to SP|P17812|CTP synthase EC (6 3.4.2.UTP) (ammonia--ligase {Homo) {sapiens} ; [ co-ortholog (2of2) of At2g34890, At1g30820, At4g20320, ]
POPTR_0001s12480	scaffold_1	9693488	9698476
POPTR_0001s12490	scaffold_1	9699582	9700762	tRNA synthetase class 1 (W and Y) family protein; tRNA synthetase class 1 (W and Y) family protein; similar to tRNA synthetase class; [ co-ortholog (2of2) of At2g25840, ]	tRNA synthetase class 1 (W and Y) family protein; tRNA synthetase class 1 (W and Y) family protein; similar to tRNA synthetase class; [ co-ortholog (2of2) of At2g25840, ]
POPTR_0001s12500	scaffold_1	9701896	9706886	Surface antigen variable number repeat	similar to outer membrane protein. [ORG:Pisum sativum]; [ co-ortholog (1of2) of At4g09080, At1g35860, CAA58720, AAA53275, S55344, At3g46740, At1g35880, ]
POPTR_0001s12510	scaffold_1	9707547	9711464	DnaJ domain
POPTR_0001s12520	scaffold_1	9714486	9717211
POPTR_0001s12530	scaffold_1	9717554	9719479	Exostosin family
POPTR_0001s12540	scaffold_1	9721824	9727054	Protein of unknown function (DUF1350)
POPTR_0001s12550	scaffold_1	9730897	9733799
POPTR_0001s12560	scaffold_1	9738143	9741150	Armadillo/beta-catenin-like repeat	similar to expressed protein in Arabidopsis thaliana; [ ortholog of At3g51980,]
POPTR_0001s12570	scaffold_1	9744048	9748588	Leucine Rich Repeat	similar to U2 small nuclear ribonucleoprotein A' (U2 snRNP-A').; [ co-ortholog (2of2) of At1g09760, ]
POPTR_0001s12580	scaffold_1	9750298	9752234	eRF1 domain 1	similar to Eukaryotic peptide chain release factor subunit 1-2 (eRF1-2) (Eukaryotic release factor 1-2) (Omnipotent suppressor protein 1 homolog 2) (SUP1 homolog 2).; [ co-ortholog (2of3) of At1g12920, At3g26618, ]
POPTR_0001s12590	scaffold_1	9754996	9757364	Mitochondrial ribosomal protein L51 / S25 / CI-B8 domain
POPTR_0001s12600	scaffold_1	9758965	9760550	SET domain
POPTR_0001s12610	scaffold_1	9767378	9773561	Uncharacterized conserved protein
POPTR_0001s12620	scaffold_1	9773951	9775714	Plant protein of unknown function
POPTR_0001s12630	scaffold_1	9782733	9783616	Ribosomal protein L21e	similar to 60S ribosomal protein L21.; [ co-ortholog (1of2) of At1g09690, At1g09590, ]
POPTR_0001s12640	scaffold_1	9785954	9788536	Glycosyl hydrolases family 16	similar to EXGT1. [ORG:Pisum sativum]; [ co-ortholog (1of2) of 1UN1_B, At2g06850, BAC58038, 1UN1_A, 1UMZ_B, CAH18931, BAA34946, ]
POPTR_0001s12650	scaffold_1	9800583	9805020	Respiratory burst NADPH oxidase
POPTR_0001s12660	scaffold_1	9810594	9814344	SNARE associated Golgi protein	similar to expressed protein in Arabidopsis thaliana; [ ortholog of At1g44960,]
POPTR_0001s12680	scaffold_1	9825246	9826247	similar to expressed protein in Arabidopsis thaliana; [ co-ortholog (2of2) of At1g28190, ]	similar to expressed protein in Arabidopsis thaliana; [ co-ortholog (2of2) of At1g28190, ]
POPTR_0001s12690	scaffold_1	9837342	9840188	Calreticulin family
POPTR_0001s12700	scaffold_1	9840787	9846728	Minichromosone maintenance protein 2
POPTR_0001s12710	scaffold_1	9851681	9853003	C2 domain
POPTR_0001s12730	scaffold_1	9854416	9859256	Emopamil binding protein
POPTR_0001s12740	scaffold_1	9868689	9870968	RNA recognition motif. (a.k.a. RRM, RBD, or RNP domain)
POPTR_0001s12750	scaffold_1	9874317	9878858	DHHC zinc finger domain
POPTR_0001s12760	scaffold_1	9879435	9879695	Zinc finger, C3HC4 type (RING finger)
POPTR_0001s12770	scaffold_1	9882278	9883712	Zinc finger, C2H2 type
POPTR_0001s12780	scaffold_1	9892455	9896030	K+ potassium transporter
POPTR_0001s12790	scaffold_1	9913205	9918209	K+ potassium transporter	similar to Potassium transporter 5 (AtPOT5) (AtHAK1) (AtHAK5).; [ co-ortholog (2of6) of At4g13420, ]
POPTR_0001s12800	scaffold_1	9932209	9935732	Zinc-finger of the MIZ type in Nse subunit
POPTR_0001s12810	scaffold_1	9936091	9936547
POPTR_0001s12820	scaffold_1	9938454	9939335	AP2 domain	similar to AP2/EREBP-like transcription factor LEAFY PETIOLE; putative; similar to AP2/EREBP-like transcription factor LEAFY PETIOLE (Arabidopsis thaliana) GI:6942018; [ co-ortholog (1of3) of At1g28160, At5g13910, ]
POPTR_0001s12830	scaffold_1	9952121	9954593	NUDIX domain	MutT/nudix family protein; similar to SP|Q09790|Diadenosine 5' ; similar to 5'''-P1; similar to P6-hexaphosphate hydrolase (EC 3.6.1.-) (Ap6A hydrolase) {Schizosaccharomyces pombe}; MutT/nudix family protein; similar to SP|Q09790|Diade ; [ co-ortholog (1o
POPTR_0001s12840	scaffold_1	9960915	9961910	Ribosomal protein S27	similar to ARABIDOPSIS RIBOSOMAL PROTEIN S27; [ co-ortholog (1of2) of At3g61110, At2g45710, ]
POPTR_0001s12850	scaffold_1	9975757	9978631	GH3 auxin-responsive promoter	auxin-responsive GH3 family protein; similar to auxin-responsive GH3 product (Glycine max) GI:18591; auxin-responsive GH3 family protein; similar to auxin-responsive GH3 product (Glycine max) G; [ co-ortholog (1of2) of At1g28130, ]
POPTR_0001s12860	scaffold_1	9986846	9992051
POPTR_0001s12870	scaffold_1	9992751	9993818
POPTR_0001s12880	scaffold_1	9997047	10000621	Zinc finger, C3HC4 type (RING finger)
POPTR_0001s12890	scaffold_1	10002256	10005798	Major Facilitator Superfamily
POPTR_0001s12900	scaffold_1	10008803	10011980
POPTR_0001s12910	scaffold_1	10016741	10018726	Cytochrome P450	similar to CYTOCHROME P450 51; [ co-ortholog (1of2) of At1g11680, ]
POPTR_0001s12920	scaffold_1	10019001	10022170	FKBP-type peptidyl-prolyl cis-trans isomerase
POPTR_0001s12930	scaffold_1	10023678	10027179	Transaldolase	similar to transaldolase; putative; [ co-ortholog (2of3) of At5g13420, ]
POPTR_0001s12940	scaffold_1	10033106	10037090	Exostosin family	exostosin family protein; [ co-ortholog (1of2) of At1g27440, ]
POPTR_0001s12950	scaffold_1	10047579	10050349	CRAL/TRIO, N-terminus
POPTR_0001s12960	scaffold_1	10050914	10053328	Ubiquinol cytochrome reductase transmembrane region	similar to ubiquinol-cytochrome C reductase iron-sulfur subunit; similar to mitochondrial; putative; similar to Rieske iron-sulfur protein; putative; similar to ubiquinol--cytochrome-c reductase from Solanum tuberosum (SP|P37841|; similar to Nicotiana tab
POPTR_0001s12970	scaffold_1	10053684	10058318	WHEP-TRS domain	similar to Glycyl-tRNA synthetase; similar to mitochondrial precursor (EC 6.1.1.14) (Glycine--tRNA ligase) (GlyRS).; [ co-ortholog (1of2) of At1g29880, At1g29870, At3g44740, ]
POPTR_0001s12980	scaffold_1	10064954	10069528	PHD-finger	zinc finger (C3HC4-type RING finger) family protein; [ co-ortholog (2of2) of At4g08590, At1g57820, At1g57800, ]
POPTR_0001s12990	scaffold_1	10082120	10085200	AP2 domain	AP2 domain-containing transcription factor family protein; similar to AP2 domain containing protein RAP2.6; similar to Arabidopsis thaliana; similar to EMBL:AF003099; [ co-ortholog (2of2) of At5g13330, ]
POPTR_0001s13000	scaffold_1	10094963	10095169
POPTR_0001s13010	scaffold_1	10095963	10096766
POPTR_0001s13020	scaffold_1	10104274	10107422	Peptidase C65 Otubain
POPTR_0001s13030	scaffold_1	10112242	10119437	RNA recognition motif. (a.k.a. RRM, RBD, or RNP domain)
POPTR_0001s13040	scaffold_1	10130224	10130658
POPTR_0001s13050	scaffold_1	10133250	10134854	SOUL heme-binding protein
POPTR_0001s13060	scaffold_1	10141583	10144141	similar to gt-2-related; weakly similar to gt-2 (GI:20249) (Oryza sativa); [ co-ortholog (1of2) of At2g33550, ]	similar to gt-2-related; weakly similar to gt-2 (GI:20249) (Oryza sativa); [ co-ortholog (1of2) of At2g33550, ]
POPTR_0001s13070	scaffold_1	10156726	10162334	PH domain
POPTR_0001s13080	scaffold_1	10169407	10172408	Protein kinase domain
POPTR_0001s13090	scaffold_1	10174855	10179113	NB-ARC domain
POPTR_0001s13100	scaffold_1	10183082	10184228	Light regulated protein Lir1	similar to gene GA protein - garden pea. [ORG:Pisum sativum]; [ co-ortholog (1of2) of At3g26740, T10182, T06776, CAA46272, BAA06153, ]
POPTR_0001s13110	scaffold_1	10193588	10199157	B3 DNA binding domain
POPTR_0001s13120	scaffold_1	10205107	10207539	PPR repeat
POPTR_0001s13130	scaffold_1	10212981	10217325
POPTR_0001s13140	scaffold_1	10224336	10227174	Serine carboxypeptidase	serine carboxypeptidase S10 family protein; similar to Serine carboxypeptidase 2 chains A and B (SP:P08819) (EC 3.4.16.6) (Triticum aestivum (Wheat); [ co-ortholog (1of2) of At2g33530, At1g28110, ]
POPTR_0001s13160	scaffold_1	10238087	10246524	similar to expressed protein in Arabidopsis thaliana; [ co-ortholog (1of2) of At5g13260, ]	similar to expressed protein in Arabidopsis thaliana; [ co-ortholog (1of2) of At5g13260, ]
POPTR_0001s13170	scaffold_1	10247567	10247848
POPTR_0001s13180	scaffold_1	10250855	10257948	NLI interacting factor-like phosphatase	similar to CTD phosphatase-like protein 3 (CPL3); similar to CTD phosphatase-like 3 (CPL3) (Arabidopsis thaliana) GI:22212705; [ co-ortholog (1of2) of At2g33540, ]
POPTR_0001s13190	scaffold_1	10279926	10281995	Helix-loop-helix DNA-binding domain
POPTR_0001s13200	scaffold_1	10286626	10287713	SAM domain (Sterile alpha motif)
POPTR_0001s13210	scaffold_1	10291770	10292197
POPTR_0001s13220	scaffold_1	10297846	10299910	RING FINGER PROTEIN
POPTR_0001s13230	scaffold_1	10330716	10332919	PPR repeat
POPTR_0001s13240	scaffold_1	10337710	10340900	tify domain	similar to expressed protein in Arabidopsis thaliana; similar to expressed protein in Arabidopsis thaliana; similar to expressed protein in Arabidopsis thaliana; [ co-ortholog (2of2) of At5g13220, ]
POPTR_0001s13245	scaffold_1	10346266	10346484
POPTR_0001s13250	scaffold_1	10346751	10347038	MAKORIN 2
POPTR_0001s13260	scaffold_1	10348763	10354570	Single-stranded DNA-binding replication protein A (RPA), large (70 kD) subunit and related ssDNA-binding proteins
POPTR_0001s13270	scaffold_1	10361668	10362828
POPTR_0001s13280	scaffold_1	10364506	10366699
POPTR_0001s13290	scaffold_1	10384182	10385920	similar to Humj1. [ORG:Humulus japonicus]; [ co-ortholog (1of2) of At1g28070, At2g33510, AAP94213, ]	similar to Humj1. [ORG:Humulus japonicus]; [ co-ortholog (1of2) of At1g28070, At2g33510, AAP94213, ]
POPTR_0001s13300	scaffold_1	10391986	10393955	LITAF-like zinc ribbon domain	similar to expressed protein in Arabidopsis thaliana; [ co-ortholog (1of2) of At5g13190, ]
POPTR_0001s13310	scaffold_1	10401778	10404875	B-box zinc finger	similar to Zinc finger protein CONSTANS-LIKE 14.; [ co-ortholog (1of2) of At2g33500, At1g28050, ]
POPTR_0001s13320	scaffold_1	10408963	10410206	Leucine Rich Repeat
POPTR_0001s13330	scaffold_1	10423895	10426474	Leucine rich repeat N-terminal domain
POPTR_0001s13340	scaffold_1	10428178	10435615		hydroxyproline-rich glycoprotein family protein; Common family member; [ co-ortholog (1of2) of At2g33490, ]
POPTR_0001s13350	scaffold_1	10439970	10444989	Transketolase, pyrimidine binding domain	similar to pyruvate dehydrogenase (lipoamide) (EC 1.2.4.1) beta chain - garden pea. [ORG:Pisum sativum]; [ co-ortholog (1of2) of P52904, AAB01223, T06532, ]
POPTR_0001s13360	scaffold_1	10457070	10457330
POPTR_0001s13370	scaffold_1	10462964	10463429
POPTR_0001s13380	scaffold_1	10464673	10466465	No apical meristem (NAM) protein	no apical meristem (NAM) family protein; similar to hypothetical protein SENU5; similar to senescence up-regulated - Lycopersicon esculentum; similar to EMBL:Z75524; [ co-ortholog (1of2) of At5g13180, ]
POPTR_0001s13390	scaffold_1	10478335	10481275	Glycerophosphoryl diester phosphodiesterase family
POPTR_0001s13400	scaffold_1	10495359	10497237	Enoyl-CoA hydratase/isomerase family
POPTR_0001s13410	scaffold_1	10500527	10503160	MtN3/saliva family
POPTR_0001s13420	scaffold_1	10503532	10508707	Protein kinase domain
POPTR_0001s13430	scaffold_1	10519065	10521361	Exo70 exocyst complex subunit
POPTR_0001s13440	scaffold_1	10531040	10531420	Glutaredoxin
POPTR_0001s13450	scaffold_1	10533244	10534533	Pollen proteins Ole e I like
POPTR_0001s13460	scaffold_1	10537248	10538542	Auxin responsive protein
POPTR_0001s13470	scaffold_1	10546655	10551976	Amidohydrolase family
POPTR_0001s13480	scaffold_1	10554294	10558642	Cyclophilin type peptidyl-prolyl cis-trans isomerase/CLD
POPTR_0001s13490	scaffold_1	10564823	10569147	ACT domain
POPTR_0001s13500	scaffold_1	10575637	10576857	TCP family transcription factor
POPTR_0001s13510	scaffold_1	10586434	10590709	Glucose-6-phosphate dehydrogenase, NAD binding domain	similar to glucose-6-phosphate dehydrogenase. [ORG:Betula pendula]; [ co-ortholog (1of2) of At5g13110, At1g24280, CAB66330, ]
POPTR_0001s13520	scaffold_1	10601070	10601726
POPTR_0001s13530	scaffold_1	10604467	10607416		similar to expressed protein in Arabidopsis thaliana; [ co-ortholog (1of2) of At5g13100, ]
POPTR_0001s13540	scaffold_1	10610334	10612009
POPTR_0001s13550	scaffold_1	10614703	10616491
POPTR_0001s13560	scaffold_1	10622725	10623558		similar to hypothetical protein; [ co-ortholog (2of2) of At1g24270, At5g13090, ]
POPTR_0001s13570	scaffold_1	10637812	10640742
POPTR_0001s13580	scaffold_1	10642783	10646031
POPTR_0001s13590	scaffold_1	10650251	10657720	ABC transporter
POPTR_0001s13600	scaffold_1	10667064	10667562
POPTR_0001s13610	scaffold_1	10672204	10672944	WRKY DNA -binding domain
POPTR_0001s13620	scaffold_1	10675727	10682417	Protein of unknown function (DUF1664)	similar to hypothetical protein. [ORG:Cicer arietinum]; [ co-ortholog (2of2) of At1g24265, CAB76910, At1g24267, ]
POPTR_0001s13630	scaffold_1	10694052	10697877	SBP domain
POPTR_0001s13640	scaffold_1	10704832	10705399
POPTR_0001s13650	scaffold_1	10729860	10732842	K-box region
POPTR_0001s13660	scaffold_1	10747910	10748155	SRF-type transcription factor (DNA-binding and dimerisation domain)
POPTR_0001s13670	scaffold_1	10765000	10767956
POPTR_0001s13680	scaffold_1	10772138	10772443	Protein of unknown function (DUF3339)
POPTR_0001s13690	scaffold_1	10777816	10778025	Protein of unknown function (DUF3339)
POPTR_0001s13700	scaffold_1	10784928	10792944	CG-1 domain	similar to calmodulin-binding protein; similar to anther ethylene-upregulated calmodulin-binding protein ER1 GI:11612392 from(Nicotiana tabacum); [ co-ortholog (2of2) of At1g67310, ]
POPTR_0001s13720	scaffold_1	10794888	10796434
POPTR_0001s13710	scaffold_1	10794918	10795697		similar to expressed protein in Arabidopsis thaliana; [ co-ortholog (2of2) of At1g27300, ]
POPTR_0001s13730	scaffold_1	10796676	10799109	Nuclear transport factor 2 (NTF2) domain
POPTR_0001s13740	scaffold_1	10803624	10809855	CHASE domain	similar to histidine kinase receptor. [ORG:Fagus sylvatica]; [ co-ortholog (2of2) of CAC09578, At1g27320, ]
POPTR_0001s13750	scaffold_1	10830676	10831680	Ribosome associated membrane protein RAMP4	similar to expressed protein in Arabidopsis thaliana; similar to EST gb|AA650671|and gb|T20610 ; [ co-ortholog (2of3) of At1g27350, At1g27330, ]
POPTR_0001s13760	scaffold_1	10835015	10839314	DnaJ domain
POPTR_0001s13770	scaffold_1	10840199	10845017	F-box domain	F-box family protein; similar to fim protein; similar to ESTs gb|T42445|; similar to gb|T76780; similar to gb|AA650733; similar to and emb|Z17748; [ co-ortholog (1of2) of At1g27340, ]
POPTR_0001s13780	scaffold_1	10858730	10859220
POPTR_0001s13790	scaffold_1	10859910	10861925	Sel1 repeat	zinc finger (MYND type) family protein; [ co-ortholog (1of2) of At1g67340, At5g50450, ]
POPTR_0001s13800	scaffold_1	10891847	10893952	Chlorophyll A-B binding protein
POPTR_0001s13810	scaffold_1	10898122	10898907
POPTR_0001s13820	scaffold_1	10900015	10902537
POPTR_0001s13830	scaffold_1	10903864	10907924
POPTR_0001s13840	scaffold_1	10909795	10910887
POPTR_0001s13850	scaffold_1	10912381	10913557	Protein of unknown function (DUF579)	similar to expressed protein in Arabidopsis thaliana; [ co-ortholog (1of2) of At1g27930, ]
POPTR_0001s13860	scaffold_1	10923594	10926322	Protease inhibitor/seed storage/LTP family
POPTR_0001s13870	scaffold_1	10926729	10932598	YT521-B-like family
POPTR_0001s13880	scaffold_1	10939576	10943937	Zn-finger in Ran binding protein and others
POPTR_0001s13890	scaffold_1	10946060	10952970	SBP domain
POPTR_0001s13900	scaffold_1	10960217	10962792	AMP-binding enzyme	4-coumarate--CoA ligase family protein; 4-coumaroyl-CoA synthase family protein; similar to gi:112801 from Petroselinum crispum; similar to GB:AAD40664 from (Solanum tuberosum) (J. Biol. Chem. 266 (13); similar to 8551-8559 (1991)); [ ortholog of At1g6294
POPTR_0001s13910	scaffold_1	10974739	10975880	Response regulator receiver domain
POPTR_0001s13920	scaffold_1	10979852	10981790	Response regulator receiver domain
POPTR_0001s13930	scaffold_1	10983026	10983562
POPTR_0001s13940	scaffold_1	10985150	10986681	Rubber elongation factor protein (REF)	similar to Hypothetical protein At1g67360.; [ co-ortholog (1of2) of At1g67360, ]
POPTR_0001s13950	scaffold_1	10988695	10993860	HORMA domain
POPTR_0001s13960	scaffold_1	10998008	11002709	Microtubule associated protein (MAP65/ASE1 family)
POPTR_0001s13970	scaffold_1	11001507	11002709	Core histone H2A/H2B/H3/H4
POPTR_0001s13980	scaffold_1	11005302	11009260	Plant specific mitochondrial import receptor subunit TOM20	similar to mitochondrial import receptor subunit TOM20-2 (TOM20-2); similar to mitochondrial import receptor subunit TOM20-2 SP:P82873 from (Arabidopsis thaliana); similar to Form of TOM20; similar to which is a component of the TOM complex; similar to in
POPTR_0001s13990	scaffold_1	11021978	11025399	Cytochrome P450
POPTR_0001s14000	scaffold_1	11030923	11034704	NLI interacting factor-like phosphatase
POPTR_0001s14010	scaffold_1	11038121	11040718	Multicopper oxidase	similar to laccase; putative; similar to diphenol oxidase; putative; similar to laccase LAC2-4; similar to Liriodendron tulipifera; similar to EMBL:LTU73106 (GI:1621467); [ ortholog of At5g60020,]
POPTR_0001s14030	scaffold_1	11041598	11044839	GRIM-19 protein	similar to expressed protein in Arabidopsis thaliana; [ co-ortholog (1of2) of At1g04630, At2g33220, ]
POPTR_0001s14040	scaffold_1	11048450	11053022	TCP-1/cpn60 chaperonin family	similar to Chaperonin CPN60-2; similar to mitochondrial precursor (HSP60-2). [ORG:Cucurbita maxima]; [ co-ortholog (1of2) of CAA50218, CAA50217, At2g33210, Q05045, At3g23990, Q05046, ]
POPTR_0001s14050	scaffold_1	11054468	11054698
POPTR_0001s14060	scaffold_1	11057819	11060245	Protein of unknown function (DUF295)
POPTR_0001s14070	scaffold_1	11063215	11063924	Dirigent-like protein
POPTR_0001s14080	scaffold_1	11064911	11066456	Dirigent-like protein
POPTR_0001s14090	scaffold_1	11066525	11068009	Hydroxyethylthiazole kinase family	hydroxyethylthiazole kinase family protein; [ co-ortholog (2of2) of At3g24030, ]
POPTR_0001s14100	scaffold_1	11071173	11074870	Core-2/I-Branching enzyme	glycosyltransferase family 14 protein; core-2/1-branching enzyme family protein; [ ortholog of At3g24040,]
POPTR_0001s14110	scaffold_1	11075261	11076472
POPTR_0001s14120	scaffold_1	11077229	11082781	Uncharacterized protein family UPF0016
POPTR_0001s14130	scaffold_1	11087168	11089314	GATA zinc finger
POPTR_0001s14140	scaffold_1	11101546	11106158	Leucine rich repeat N-terminal domain	similar to leucine-rich repeat transmembrane protein kinase; putative; similar to receptor protein kinase (Pinus sylvestris) gi|12054894|emb|CAC20842|; similar to leucine rich repeat (LRR) domain containing protein; similar to protein kinase domain contai
POPTR_0001s14150	scaffold_1	11108217	11108639	Plant self-incompatibility protein S1
POPTR_0001s14160	scaffold_1	11112578	11112979	Plant self-incompatibility protein S1
POPTR_0001s14170	scaffold_1	11125647	11126234	Plant self-incompatibility protein S1	similar to self-incompatibility protein-related; similar to low similarity to S3 self-incompatibility protein (Papaver rhoeas) GI:1107841; [ co-ortholog (2of2) of At3g24060, ]
POPTR_0001s14180	scaffold_1	11133109	11138143
POPTR_0001s14190	scaffold_1	11148744	11149384
POPTR_0001s14200	scaffold_1	11151244	11151666
POPTR_0001s14210	scaffold_1	11157912	11158768		similar to expressed protein in Arabidopsis thaliana; similar to expression supported by MPSS; [ co-ortholog (2of2) of At1g04670, ]
POPTR_0001s14220	scaffold_1	11161613	11165154	Leucine rich repeat N-terminal domain	similar to leucine-rich repeat transmembrane protein kinase; putative; [ co-ortholog (2of2) of At3g24240, ]
POPTR_0001s14230	scaffold_1	11171179	11174733	Ham1 family	similar to inosine triphosphate pyrophosphatase; putative; HAM1 family protein; similar to inosine triphosphate pyrophosphatase (GI:13398328) (Homo sapiens); [ co-ortholog (1of2) of At4g13720, ]
POPTR_0001s14240	scaffold_1	11177074	11182374	Pectate lyase	similar to pectate lyase. [ORG:Fragaria x ananassa]; [ co-ortholog (1of2) of AAK66161, At1g04680, ]
POPTR_0001s14250	scaffold_1	11203177	11203605
POPTR_0001s14260	scaffold_1	11209181	11212676	Aldo/keto reductase family	similar to POTASSIUM CHANNEL BETA SUBUNIT; similar to POTASSIUM CHANNEL BETA SUBUNIT HOMOLOG; [ ortholog of At1g04690,]
POPTR_0001s14270	scaffold_1	11216164	11221199	PB1 domain
POPTR_0001s14280	scaffold_1	11230896	11236060	Thiolase, N-terminal domain
POPTR_0001s14290	scaffold_1	11238666	11243134	Thiolase, N-terminal domain
POPTR_0001s14300	scaffold_1	11244563	11250058	Dehydratase family	similar to dehydratase family; [ co-ortholog (2of2) of At3g23940, ]
POPTR_0001s14310	scaffold_1	11253694	11256265	Chalcone and stilbene synthases, N-terminal domain	similar to naregenin-chalcone synthase. [ORG:Medicago sativa]; [ co-ortholog (3of6) of CAA38456, S49203, 1JWX_A, CAA00091, Q9ZRR8, P51081, CAA44186, AAL09179, S33610, AAL09175, 1D6I_A, AAF71254, 1I88_A, CAA10641, CAA44933, S35166, AAM00232, BAA01075, P300
POPTR_0001s14320	scaffold_1	11261944	11263645	Chalcone and stilbene synthases, N-terminal domain	similar to naregenin-chalcone synthase. [ORG:Medicago sativa]; [ co-ortholog (2of6) of CAA38456, S49203, 1JWX_A, CAA00091, Q9ZRR8, P51081, CAA44186, AAL09179, S33610, AAL09175, 1D6I_A, AAF71254, 1I88_A, CAA10641, CAA44933, S35166, AAM00232, BAA01075, P300
POPTR_0001s14330	scaffold_1	11271055	11272668	Ankyrin repeat
POPTR_0001s14340	scaffold_1	11274406	11275753
POPTR_0001s14350	scaffold_1	11276290	11279352
POPTR_0001s14360	scaffold_1	11280830	11286232		monooxygenase family protein; similar to low similarity to VisC (Escherichia coli)(GI:216629); [ ortholog of At3g24200,]
POPTR_0001s14370	scaffold_1	11286679	11287057
POPTR_0001s14380	scaffold_1	11287320	11288770	Response regulator receiver domain
POPTR_0001s14390	scaffold_1	11290366	11291784	Response regulator receiver domain
POPTR_0001s14400	scaffold_1	11293954	11295180	Response regulator receiver domain
POPTR_0001s14410	scaffold_1	11295418	11305423	ABC1 family
POPTR_0001s14420	scaffold_1	11309936	11312524	Tetratricopeptide repeat
POPTR_0001s14430	scaffold_1	11312603	11315518	Synaptobrevin
POPTR_0001s14440	scaffold_1	11314151	11314412
POPTR_0001s14450	scaffold_1	11320991	11334164	ATPase family associated with various cellular activities (AAA)
POPTR_0001s14460	scaffold_1	11335377	11340138	Cellulose synthase	cellulose synthase family protein; similar to gi:2827143 from Arabidopsis thaliana (Ath-B); similar to cellulose synthase; [ co-ortholog (2of2) of At2g33100, ]
POPTR_0001s14470	scaffold_1	11348297	11351515	F-box domain
POPTR_0001s14480	scaffold_1	11360152	11370118	Pyridine nucleotide-disulphide oxidoreductase	similar to probable glutathione-disulfide reductase (EC 1.8.1.7) - garden pea. [ORG:Pisum sativum]; [ co-ortholog (1of2) of CAB66332, Q43621, At3g24170, CAA66924, T06442, ]
POPTR_0001s14490	scaffold_1	11369428	11373148	Putative peptidoglycan binding domain	similar to peptidoglycan-binding domain-containing protein; similar to spore cortex-lytic enzyme prepeptide (GI:1644192) (Bacillus cereus); [ ortholog of At4g13670,]
POPTR_0001s14500	scaffold_1	11374545	11379085		similar to PUTATIVE TYPE 1 MEMBRANE PROTEIN; [ co-ortholog (1of2) of At3g24160, ]
POPTR_0001s14510	scaffold_1	11385962	11386988
POPTR_0001s14520	scaffold_1	11394378	11396258
POPTR_0001s14540	scaffold_1	11403662	11404877
POPTR_0001s14550	scaffold_1	11405139	11405804
POPTR_0001s14560	scaffold_1	11416411	11425627	LisH
POPTR_0001s14570	scaffold_1	11422645	11423121
POPTR_0001s14590	scaffold_1	11431474	11434973	Zinc finger, C3HC4 type (RING finger)
POPTR_0001s14600	scaffold_1	11448486	11454245	Prenyltransferase and squalene oxidase repeat
POPTR_0001s14610	scaffold_1	11458206	11463971	Prenyltransferase and squalene oxidase repeat
POPTR_0001s14620	scaffold_1	11468327	11475346	ABC transporter
POPTR_0001s14630	scaffold_1	11479436	11486559	ABC transporter
POPTR_0001s14640	scaffold_1	11498895	11502275	ABC-2 type transporter
POPTR_0001s14650	scaffold_1	11505508	11513179	ABC transporter
POPTR_0001s14655	scaffold_1	11521472	11523708
POPTR_0001s14660	scaffold_1	11544489	11552017	ABC transporter
POPTR_0001s14670	scaffold_1	11560972	11561508
POPTR_0001s14680	scaffold_1	11563893	11567731	Protein kinase domain
POPTR_0001s14690	scaffold_1	11569890	11570509
POPTR_0001s14700	scaffold_1	11576416	11582683	Cation transporter/ATPase, N-terminus	similar to H+-ATPase. [ORG:Medicago truncatula]; [ co-ortholog (3of5) of CAB85494, T52413, CAB85495, ]
POPTR_0001s14710	scaffold_1	11584485	11586840	hAT family dimerisation domain
POPTR_0001s14720	scaffold_1	11591730	11592577	AP2 domain
POPTR_0001s14730	scaffold_1	11596214	11602014	WD domain, G-beta repeat	transducin family protein; WD-40 repeat family protein; similar to mRNA-associated protein mrnp 41 (SP:P78406) (Homo sapiens); similar to mitotic checkpoint protein GI:9294423 from (Arabidopsis thaliana); [ co-ortholog (2of2) of At1g80670, At1g15850, ]
POPTR_0001s14740	scaffold_1	11611288	11615975	Domain of unknown function (DUF298)
POPTR_0001s14750	scaffold_1	11616987	11619025	PPPDE putative peptidase domain
POPTR_0001s14760	scaffold_1	11625324	11627503
POPTR_0001s14770	scaffold_1	11628169	11630338	Mitochondrial glycoprotein	mitochondrial glycoprotein family protein; MAM33 family protein; similar to SUAPRGA1 (Emericella nidulans) GI:6562379; [ ortholog of At1g15870,At1g80720,]
POPTR_0001s14780	scaffold_1	11632788	11633869	Zinc-finger double-stranded RNA-binding
POPTR_0001s14790	scaffold_1	11641849	11645446	Ribosomal L30 N-terminal domain	similar to 60S ribosomal protein L7 (RPL7A); similar to ribosomal protein L7 GB:AAA03081 GI:307388 from (Homo sapiens); [ co-ortholog (1of2) of At1g80750, ]
POPTR_0001s14800	scaffold_1	11645301	11647323
POPTR_0001s14810	scaffold_1	11647367	11654727	PPR repeat	similar to pentatricopeptide (PPR) repeat-containing protein; [ ortholog of At1g76280,]
POPTR_0001s14820	scaffold_1	11657402	11662108	Snare region anchored in the vesicle membrane C-terminus	similar to Golgi SNARE 11 protein (AtGOS11) (Golgi SNAP receptor complex member 1-1).; [ co-ortholog (1of2) of At1g15880, ]
POPTR_0001s14830	scaffold_1	11662195	11662672
POPTR_0001s14840	scaffold_1	11663151	11664026
POPTR_0001s14850	scaffold_1	11665838	11668761	Major intrinsic protein	similar to Probable aquaporin NIP6.1 (NOD26-like intrinsic protein 6.1).; [ co-ortholog (1of2) of At1g80760, ]
POPTR_0001s14860	scaffold_1	11675959	11676783	CAF1 family ribonuclease
POPTR_0001s14870	scaffold_1	11678756	11680620	Ribosomal protein L7Ae/L30e/S12e/Gadd45 family
POPTR_0001s14880	scaffold_1	11687724	11697890		similar to expressed protein in Arabidopsis thaliana; similar to androgen-induced prostate proliferative shutoff associated protein (GI:4559410) (Homo sapiens); [ co-ortholog (2of2) of At1g80810, At1g15940, ]
POPTR_0001s14890	scaffold_1	11703969	11706534	NAD dependent epimerase/dehydratase family
POPTR_0001s14900	scaffold_1	11733419	11733973
POPTR_0001s14910	scaffold_1	11738342	11740892	NAD dependent epimerase/dehydratase family
POPTR_0001s14920	scaffold_1	11755391	11758573	Plant protein of unknown function
POPTR_0001s14930	scaffold_1	11766758	11767034
POPTR_0001s14940	scaffold_1	11771142	11772439
POPTR_0001s14950	scaffold_1	11789572	11791872
POPTR_0001s14970	scaffold_1	11803723	11806367	NAD dependent epimerase/dehydratase family
POPTR_0001s14980	scaffold_1	11819715	11820349
POPTR_0001s14990	scaffold_1	11823004	11823470
POPTR_0001s15000	scaffold_1	11828207	11831055	K+ potassium transporter
POPTR_0001s15010	scaffold_1	11833485	11834915
POPTR_0001s15020	scaffold_1	11860343	11860786
POPTR_0001s15030	scaffold_1	11862911	11865977	bZIP transcription factor
POPTR_0001s15040	scaffold_1	11883599	11887869	ERCC4 domain
POPTR_0001s15050	scaffold_1	11890605	11893635	Class-II DAHP synthetase family
POPTR_0001s15060	scaffold_1	11901778	11902854
POPTR_0001s15070	scaffold_1	11904525	11906119	Alcohol dehydrogenase transcription factor Myb/SANT-like
POPTR_0001s15080	scaffold_1	11911079	11913795	Amino acid permease
POPTR_0001s15090	scaffold_1	11931769	11935992
POPTR_0001s15100	scaffold_1	11944933	11945826
POPTR_0001s15110	scaffold_1	11947907	11970634	SpoU rRNA Methylase family
POPTR_0001s15120	scaffold_1	11971238	11975183	Peptidase inhibitor I9
POPTR_0001s15130	scaffold_1	11978276	11980091
POPTR_0001s15140	scaffold_1	11979667	11982113		similar to lil3 protein; putative; similar to Lil3 protein (Arabidopsis thaliana) gi|4741966|gb|AAD28780|; [ co-ortholog (2of2) of At4g17600, At5g47110, ]
POPTR_0001s15145	scaffold_1	11989448	11989840
POPTR_0001s15150	scaffold_1	11993165	11994482	Rare lipoprotein A (RlpA)-like double-psi beta-barrel	similar to Expansin-related protein 1 precursor (AtEXPR1) (At-EXPR1) (Ath- ExpBeta-3.1).; [ co-ortholog (2of2) of At4g17030, ]
POPTR_0001s15160	scaffold_1	11997090	11998568
POPTR_0001s15170	scaffold_1	12000075	12006774	GATA zinc finger	zinc finger (GATA type) family protein; [ co-ortholog (1of2) of At4g17570, At5g47140, ]
POPTR_0001s15180	scaffold_1	12028575	12030577	Uncharacterised protein family UPF0005	similar to Bax inhibitor-1 (BI-1) (AtBI-1).; [ ortholog of At5g47130,At5g47120,At4g17580,]
POPTR_0001s15190	scaffold_1	12036441	12039346	Protein kinase domain	protein kinase family protein; similar to protein kinase domain containing protein; [ co-ortholog (1of3) of At4g16970, ]
POPTR_0001s15200	scaffold_1	12044078	12048338	MSP (Major sperm protein) domain
POPTR_0001s15210	scaffold_1	12054472	12056976
POPTR_0001s15220	scaffold_1	12058194	12061205	MSP (Major sperm protein) domain
POPTR_0001s15230	scaffold_1	12068261	12070371	Ribosomal protein L19	ribosomal protein L19 family protein; similar to plastid ribosomal protein L19 precursor (Spinacia oleracea) gi|7582403|gb|AAF64312|; [ ortholog of At5g47190,At4g17560,]
POPTR_0001s15240	scaffold_1	12072485	12076090	Major Facilitator Superfamily
POPTR_0001s15250	scaffold_1	12084550	12085996
POPTR_0001s15260	scaffold_1	12095670	12098786		monooxygenase family protein; similar to CTF2B (GI:4164578)(Plant Physiol. 119; similar to 364 (1999); similar to PGR99-008); [ co-ortholog (1of2) of At2g35660, At2g29720, ]
POPTR_0001s15270	scaffold_1	12106312	12107722
POPTR_0001s15280	scaffold_1	12110874	12113458	Ras family	similar to GTP-binding protein. [ORG:Pisum sativum]; [ co-ortholog (1of9) of CAA90079, CAA98174, S57471, S57478, CAA90082, S57474, BAA02118, S57462, CAA98173, CAA98162, 2115367A, CAA82707, CAA90081, CAA98159, 2001457K, CAA98161, CAA98172, CAA98164, BAA764
POPTR_0001s15285	scaffold_1	12115442	12116715	PPR repeat
POPTR_0001s15290	scaffold_1	12116950	12120983	Stm1	similar to nuclear RNA-binding protein; putative; similar to nuclear RNA binding protein GI:6492264 from (Arabidopsis thaliana); [ co-ortholog (2of2) of At4g17520, At5g47210, ]
POPTR_0001s15300	scaffold_1	12131968	12133552	Lipase (class 3)
POPTR_0001s15310	scaffold_1	12148610	12151550	PHD-finger
POPTR_0001s15320	scaffold_1	12158566	12162012	Enoyl-CoA hydratase/isomerase family
POPTR_0001s15330	scaffold_1	12166358	12169724	Carbamoyl-phosphate synthase small chain, CPSase domain
POPTR_0001s15340	scaffold_1	12172084	12173830
POPTR_0001s15350	scaffold_1	12175179	12175718
POPTR_0001s15360	scaffold_1	12181607	12183937	D-mannose binding lectin
POPTR_0001s15370	scaffold_1	12187818	12190353
POPTR_0001s15380	scaffold_1	12206111	12207303
POPTR_0001s15390	scaffold_1	12210536	12211618	AP2 domain
POPTR_0001s15400	scaffold_1	12224379	12225678	AP2 domain	similar to Ethylene responsive element binding factor 5 (AtERF5).; [ co-ortholog (1of2) of At5g47230, At4g17490, ]
POPTR_0001s15410	scaffold_1	12248952	12252996	NUDIX domain
POPTR_0001s15420	scaffold_1	12260371	12262949	PPPDE putative peptidase domain
POPTR_0001s15430	scaffold_1	12264176	12265892
POPTR_0001s15440	scaffold_1	12271278	12279083	Palmitoyl protein thioesterase
POPTR_0001s15460	scaffold_1	12279641	12283088	Dual specificity phosphatase, catalytic domain	dual specificity protein phosphatase family protein; similar to catalytic domain; [ co-ortholog (2of2) of At2g35680, ]
POPTR_0001s15470	scaffold_1	12289357	12290787	PPR repeat
POPTR_0001s15480	scaffold_1	12295768	12297902
POPTR_0001s15490	scaffold_1	12306114	12308417	HD-ZIP protein N terminus	similar to homeobox-leucine zipper protein. [ORG:Glycine max]; [ co-ortholog (1of2) of AAA74017, CAA63222, At4g17460, T06438, T07614, At5g47370, At4g16780, ]
POPTR_0001s15500	scaffold_1	12330755	12338283		similar to expressed protein in Arabidopsis thaliana; similar to a novel protein with a RING finger motif near the amino terminus; similar to cold regulated; [ co-ortholog (1of2) of At2g39810, ]
POPTR_0001s15510	scaffold_1	12346639	12349564	Zinc knuckle	similar to syringolide-induced protein 1-3-1B. [ORG:Glycine max]; [ co-ortholog (2of9) of BAB86893, BAB86892, ]
POPTR_0001s15520	scaffold_1	12350544	12352346
POPTR_0001s15530	scaffold_1	12367283	12374608	Acyl-CoA dehydrogenase, middle domain	similar to acyl-CoA oxidase. [ORG:Glycine max]; [ co-ortholog (1of2) of AAL01888, AAL01887, At2g35690, At4g16760, ]
POPTR_0001s15540	scaffold_1	12380638	12381888	Ataxin-2 C-terminal region
POPTR_0001s15550	scaffold_1	12390334	12391092	AP2 domain
POPTR_0001s15560	scaffold_1	12412707	12417005
POPTR_0001s15570	scaffold_1	12423120	12427240	Protein of unknown function DUF124	similar to expressed protein in Arabidopsis thaliana; [ co-ortholog (1of2) of At5g47420, At4g17420, ]
POPTR_0001s15580	scaffold_1	12437560	12443844	DWNN domain
POPTR_0001s15590	scaffold_1	12449318	12451862	Ribosomal L15	similar to 60S ribosomal protein L15. [ORG:Quercus suber]; [ co-ortholog (4of4) of O82712, ]
POPTR_0001s15600	scaffold_1	12452164	12454303
POPTR_0001s15610	scaffold_1	12456322	12464041	MutS domain III
POPTR_0001s15620	scaffold_1	12465107	12466390
POPTR_0001s15630	scaffold_1	12472354	12473855		similar to hypothetical protein; [ co-ortholog (1of3) of At2g01410, ]
POPTR_0001s15640	scaffold_1	12476627	12477989
POPTR_0001s15650	scaffold_1	12478590	12482380	Formyl transferase
POPTR_0001s15660	scaffold_1	12481915	12484908	Plant protein of unknown function (DUF828)	similar to expressed protein in Arabidopsis thaliana; similar to strong similarity to unknown protein (pir||G71442); [ co-ortholog (2of2) of At5g47440, At4g17350, ]
POPTR_0001s15665	scaffold_1	12490864	12496635	Zinc knuckle
POPTR_0001s15680	scaffold_1	12504446	12511300
POPTR_0001s15700	scaffold_1	12514892	12516210	Major intrinsic protein	similar to Probable aquaporin TIP2.3 (Tonoplast intrinsic protein 2.3).; [ co-ortholog (1of2) of At4g17340, At5g47450, ]
POPTR_0001s15710	scaffold_1	12527698	12528579	AP2 domain
POPTR_0001s15720	scaffold_1	12538978	12542490
POPTR_0001s15730	scaffold_1	12542559	12545022
POPTR_0001s15740	scaffold_1	12548540	12561004	Agenet domain
POPTR_0001s15750	scaffold_1	12561403	12566311	GDP-fucose protein O-fucosyltransferase
POPTR_0001s15760	scaffold_1	12584314	12585411	Putative peptidoglycan binding domain	similar to senescence-specific protein. [ORG:Cucumis sativus]; [ co-ortholog (10of13) of T10191, CAB76364, AAA99948, ]
POPTR_0001s15770	scaffold_1	12595707	12596154
POPTR_0001s15780	scaffold_1	12602047	12605585	EamA-like transporter family
POPTR_0001s15790	scaffold_1	12613068	12614115	Zinc finger, C2H2 type
POPTR_0001s15800	scaffold_1	12632318	12640075
POPTR_0001s15810	scaffold_1	12643181	12646804	Pex19 protein family	peroxisomal protein PEX19 family protein; [ co-ortholog (2of2) of At5g17550, At3g03490, ]
POPTR_0001s15820	scaffold_1	12652435	12653995
POPTR_0001s15830	scaffold_1	12667841	12668615
POPTR_0001s15840	scaffold_1	12675129	12682781	DnaJ domain	similar to DNAJ heat shock N-terminal domain-containing protein; similar to low similarity to SP|O54946 DnaJ homolog subfamily B member 6 (Heat shock protein J2) Mus musculus; [ co-ortholog (1of3) of At2g35720, ]
POPTR_0001s15850	scaffold_1	12689335	12690111	Protease inhibitor/seed storage/LTP family	similar to HyPRP. [ORG:Fragaria x ananassa]; [ co-ortholog (2of3) of AAC49369, AAL26908, S70586, BAA11854, At1g12090, BAA11855, AAD37833, AAM75351, At1g62510, CAB96990, AAD37834, AAS76505, T09546, ]
POPTR_0001s15860	scaffold_1	12699754	12701499		similar to protein arginine N-methyltransferase-related; weakly similar to protein arginine N-methyltransferase 2 (EC 2.1.1.-) (Swiss-Prot:P55345) (Homo sapiens); [ co-ortholog (2of2) of At4g16570, ]
POPTR_0001s15870	scaffold_1	12713997	12715993
POPTR_0001s15880	scaffold_1	12723285	12726242	CRAL/TRIO, N-terminus
POPTR_0001s15890	scaffold_1	12729157	12730089	VQ motif
POPTR_0001s15900	scaffold_1	12733867	12741047	Heavy-metal-associated domain	similar to Copper-transporting ATPase RAN1 (EC 3.6.3.4) (Responsive-to-antagonist 1).; [ co-ortholog (1of2) of At5g44790, ]
POPTR_0001s15910	scaffold_1	12754734	12759038	Thioredoxin
POPTR_0001s15920	scaffold_1	12772169	12775718	B-box zinc finger	similar to zinc-binding protein. [ORG:Pisum sativum]; [ co-ortholog (1of4) of BAB69816, ]
POPTR_0001s15930	scaffold_1	12783314	12784109	Zinc finger, C3HC4 type (RING finger)
POPTR_0001s15940	scaffold_1	12785498	12790684	Cytidylyltransferase
POPTR_0001s15960	scaffold_1	12793872	12794698
POPTR_0001s15970	scaffold_1	12795882	12799969	UreD urease accessory protein
POPTR_0001s15980	scaffold_1	12800725	12806587	UTP--glucose-1-phosphate uridylyltransferase
POPTR_0001s15990	scaffold_1	12824561	12826833		similar to QUARTET 3; [ co-ortholog (2of4) of At4g20050, ]
POPTR_0001s16000	scaffold_1	12836524	12837344
POPTR_0001s16010	scaffold_1	12840274	12844464	Peptidase family M20/M25/M40	peptidase M20/M25/M40 family protein; similar to hydantoin utilization protein C (Pseudomonas sp.) SWISS-PROT:Q01264; [ ortholog of At4g20070,]
POPTR_0001s16020	scaffold_1	12844992	12845364
POPTR_0001s16030	scaffold_1	12846294	12851269	Lectin C-type domain
POPTR_0001s16050	scaffold_1	12853800	12862513	ZIP Zinc transporter	similar to zinc transporter protein ZIP1. [ORG:Glycine max]; [ co-ortholog (1of4) of AAK37761, AAR08414, ]
POPTR_0001s16060	scaffold_1	12873592	12875834	VMA21-like domain
POPTR_0001s16070	scaffold_1	12876557	12878495	Phosphatidylinositol N-acetylglucosaminyltransferase	phosphatidylinositolglycan synthase family protein; similar to SP|Q92535|Phosphatidylinositol glycan-biosynthesis ; similar to class C protein (PIG-C) {Homo sapiens}; similar to Encodes a putative phosphatidylinositol-glycan synthase subunit C gene. It is
POPTR_0001s16080	scaffold_1	12884464	12889594	Zinc finger, C2H2 type	zinc finger (C2H2 type) family protein; similar to C2H2 type; [ co-ortholog (1of2) of At1g30970, ]
POPTR_0001s16090	scaffold_1	12897295	12904886	GTPase of unknown function	similar to GTP-binding protein ERG.; [ ortholog of At1g30960,]
POPTR_0001s16100	scaffold_1	12906284	12907618	F-box domain	similar to UNUSUAL FLORAL ORGANS protein.; [ co-ortholog (1of2) of At1g30950, ]
POPTR_0001s16110	scaffold_1	12931373	12935236	Leucine Rich Repeat
POPTR_0001s16120	scaffold_1	12940801	12946302	Calcineurin-like phosphoesterase
POPTR_0001s16130	scaffold_1	12952302	12952493	DVL family
POPTR_0001s16140	scaffold_1	12957723	12958284
POPTR_0001s16150	scaffold_1	12963807	12971224	Cation transporter/ATPase, N-terminus	similar to putative plasma membrane H+ ATPase. [ORG:Prunus persica]; [ ortholog of CAB69825,At1g17260,]
POPTR_0001s16160	scaffold_1	12973162	12976102	Lipase (class 3)	lipase class 3 family protein; similar to low similarity to Chain A; similar to Lipase Ii From Rhizopus Niveus GI:1942798; [ co-ortholog (2of2) of At3g14360, ]
POPTR_0001s16170	scaffold_1	12987978	12996333	Leucine rich repeat N-terminal domain	similar to leucine-rich repeat transmembrane protein kinase; putative; similar to GI:3360289 from (Zea mays) (Plant Mol. Biol. 37 (5); similar to 749-761 (1998)); [ co-ortholog (1of2) of At1g53730, ]
POPTR_0001s16180	scaffold_1	12996908	13001276	ATPase family associated with various cellular activities (AAA)	similar to 26S protease regulatory subunit 7 (26S proteasome subunit 7) (26S proteasome AAA-ATPase subunit RPT1a) (Regulatory particle triple-A ATPase subunit 1a).; [ ortholog of At1g53780,At1g53750,]
POPTR_0001s16190	scaffold_1	13011359	13015009	Uncharacterised conserved protein (DUF2343)	similar to expressed protein in Arabidopsis thaliana; [ ortholog of At1g53760,]
POPTR_0001s16200	scaffold_1	13017378	13022562	NUMOD3 motif	similar to expressed protein in Arabidopsis thaliana; [ co-ortholog (2of2) of At1g53800, ]
POPTR_0001s16210	scaffold_1	13026903	13028535	Zinc finger, C3HC4 type (RING finger)	zinc finger (C3HC4-type RING finger) family protein; similar to RING-H2 zinc finger protein (ATL3) GB:AF132013 (Arabidopsis thaliana); similar to RING-H2 zinc finger protein ATL3 (ATL3) mRNA; [ co-ortholog (1of2) of At1g72310, ]
POPTR_0001s16220	scaffold_1	13029659	13031139
POPTR_0001s16230	scaffold_1	13032423	13037706	Ubiquitin-conjugating enzyme	similar to ubiquitin-conjugating enzyme; putative; similar to ubiquitin conjugating enzyme 6 from (Homo sapiens) GI:14029267; similar to (Mus musculus) GI:14029263; [ co-ortholog (1of2) of At1g17280, At5g50430, ]
POPTR_0001s16240	scaffold_1	13049444	13049843
POPTR_0001s16250	scaffold_1	13065437	13070917	Plant invertase/pectin methylesterase inhibitor	similar to pectinesterase. [ORG:Fragaria x ananassa]; [ co-ortholog (2of5) of At1g53830, AAQ21126, At3g14310, ]
POPTR_0001s16270	scaffold_1	13080143	13082446	Plant invertase/pectin methylesterase inhibitor	similar to putative pectin methylesterase LuPME5. [ORG:Linum usitatissimum]; [ co-ortholog (3of15) of CAC18726, AAK69696, AAB32924, CAC18727, AAB32926, CAC18725, AAB32929, AAB32927, ]
POPTR_0001s16280	scaffold_1	13086593	13088702	Plant invertase/pectin methylesterase inhibitor
POPTR_0001s16291	scaffold_1	13091735	13094500	Plant invertase/pectin methylesterase inhibitor
POPTR_0001s16300	scaffold_1	13097999	13102929	Aminotransferase class I and II	similar to ALANINE AMINOTRANSFERAS; [ ortholog of At1g17290,]
POPTR_0001s16310	scaffold_1	13104274	13108534	Proteasome subunit A N-terminal signature	similar to Proteasome subunit alpha type 5-1 (EC 3.4.25.1) (20S proteasome alpha subunit E1).; [ co-ortholog (1of2) of At3g14290, At1g53850, ]
POPTR_0001s16320	scaffold_1	13126490	13129784	Remorin, C-terminal region	remorin family protein; similar to C-terminal region; [ ortholog of At1g53860,]
POPTR_0001s16330	scaffold_1	13133189	13134341		similar to expressed protein in Arabidopsis thaliana; [ co-ortholog (2of2) of At3g14280, ]
POPTR_0001s16340	scaffold_1	13134369	13134867
POPTR_0001s16350	scaffold_1	13134980	13143795	FYVE zinc finger	phosphatidylinositol-4-phosphate 5-kinase family protein; similar to SP|Q9Z1T6|FYVE finger containing-phosphoinositide kinase EC (2 7.1.68.1) (phosphatidylinositol- 4-phosphate-kinase PIP5K) (PtdIns) (4(P)5-kinase-{Mus) {musculus} ; [ co-ortholog (1of4) o
POPTR_0001s16360	scaffold_1	13148104	13151028	Initiation factor 2 subunit family	eukaryotic translation initiation factor 2B family protein; eIF-2B family protein; similar to SP|Q64270|Translation initiation factor eIF 2B-alpha subunit {Rattus {norvegicus} ; [ co-ortholog (1of2) of At1g53880, At1g53900, ]
POPTR_0001s16370	scaffold_1	13161008	13161967	Protein of unknown function (DUF581)
POPTR_0001s16380	scaffold_1	13163152	13163373		similar to expressed protein in Arabidopsis thaliana; similar to expression supported by MPSS; [ co-ortholog (4of4) of At2g47220, At3g62300, At1g03300, At1g26540, At2g47230, At2g46840, At1g11420, ]
POPTR_0001s16390	scaffold_1	13169416	13172254	Peptidase inhibitor I9	subtilase family protein; similar to SBT1 GI:1771160 from (Lycopersicon esculentum); [ ortholog of At3g14240,]
POPTR_0001s16400	scaffold_1	13185669	13188435	AP2 domain	similar to transcription factor EREBP-like protein. [ORG:Cicer arietinum]; [ co-ortholog (2of2) of AAQ10777, CAD56217, At3g14230, At1g53910, CAE54591, CAD21849, ]
POPTR_0001s16410	scaffold_1	13195242	13196881	Late embryogenesis abundant protein
POPTR_0001s16420	scaffold_1	13215850	13225507	SacI homology domain
POPTR_0001s16430	scaffold_1	13225596	13228072	Ribosomal protein S2
POPTR_0001s16440	scaffold_1	13229258	13236254	CBF/Mak21 family	similar to CCAAT-box-binding transcription factor-related; similar to CCAAT-box-binding transcription factor (CCAAT-binding factor) (CBF) (Swiss-Prot:Q03701) (Homo sapiens); similar to GB:P53569 (Mus musculus); [ ortholog of At1g72440,]
POPTR_0001s16450	scaffold_1	13236616	13236990	Hsp20/alpha crystallin family
POPTR_0001s16460	scaffold_1	13242043	13242627	Auxin responsive protein	similar to auxin-responsive protein-related; similar to auxin-induced protein TGSAUR21 (GI:10185818) Tulipa gesneriana); [ co-ortholog (2of2) of At1g72430, At1g17345, At5g20820, ]
POPTR_0001s16470	scaffold_1	13254038	13254449
POPTR_0001s16480	scaffold_1	13269304	13270435
POPTR_0001s16490	scaffold_1	13290244	13291049
POPTR_0001s16500	scaffold_1	13293111	13298289	DnaJ domain
POPTR_0001s16520	scaffold_1	13303817	13306129	Dormancy/auxin associated protein
POPTR_0001s16530	scaffold_1	13312198	13314087
POPTR_0001s16540	scaffold_1	13316113	13316904
POPTR_0001s16550	scaffold_1	13318956	13325518
POPTR_0001s16560	scaffold_1	13327039	13332805	ABC transporter transmembrane region
POPTR_0001s16570	scaffold_1	13334080	13335999	Plant protein of unknown function (DUF936)
POPTR_0001s16580	scaffold_1	13345084	13347139	bZIP transcription factor
POPTR_0001s16590	scaffold_1	13351697	13356055	Synaptobrevin	similar to 25.3 kDa vesicle transport protein (AtSEC22).; [ co-ortholog (2of2) of At1g11890, ]
POPTR_0001s16600	scaffold_1	13371291	13379337	Spt20 family	similar to expressed protein in Arabidopsis thaliana; [ co-ortholog (3of3) of At1g72390, ]
POPTR_0001s16610	scaffold_1	13381382	13394566		similar to expressed protein in Arabidopsis thaliana; similar to Nuclear pore complex protein Nup107 (Nucleoporin Nup107) (107 kDa nucleoporin) (p105) (Swiss-Prot:P52590) (Rattus norvegicus); similar to expressed protein in Arabidopsis thaliana; similar t
POPTR_0001s16620	scaffold_1	13402423	13405506	Tetratricopeptide repeat
POPTR_0001s16630	scaffold_1	13405680	13411157	RNA recognition motif. (a.k.a. RRM, RBD, or RNP domain)	similar to oligouridylate-binding protein; putative; similar to oligouridylate binding protein (Nicotiana plumbaginifolia) GI:6996560; [ co-ortholog (1of2) of At1g54080, At1g17370, At3g14100, ]
POPTR_0001s16640	scaffold_1	13418680	13420343	tify domain
POPTR_0001s16650	scaffold_1	13435693	13437912	Leucine rich repeat N-terminal domain
POPTR_0001s16660	scaffold_1	13442943	13445208	Exo70 exocyst complex subunit	exocyst subunit EXO70 family protein; [ co-ortholog (1of2) of At1g72470, ]
POPTR_0001s16670	scaffold_1	13447380	13451644	Lung seven transmembrane receptor
POPTR_0001s16680	scaffold_1	13455421	13458919	LSM domain	similar to small nuclear ribonucleoprotein; putative; similar to snRNP; putative; similar to Sm protein; putative; similar to U6 snRNA-associated Sm-like protein LSm1 (Small nuclear ribonuclear CaSm; similar to Cancer-associated Sm-like) (Homo sapiens) SW
POPTR_0001s16690	scaffold_1	13462961	13464994
POPTR_0001s16700	scaffold_1	13480231	13484979	von Willebrand factor type A domain
POPTR_0001s16710	scaffold_1	13497903	13499722	Protein of unknown function (DUF1677)	similar to hypothetical protein; [ co-ortholog (1of2) of At1g72510, At2g09970, ]
POPTR_0001s16720	scaffold_1	13508589	13510806
POPTR_0001s16730	scaffold_1	13513715	13520026	Aldehyde dehydrogenase family	Aldehyde dehydrogenase family 7 member a1 turgor responsive protein; [ co-ortholog (1of2) of At1g54100, P25795, ]
POPTR_0001s16740	scaffold_1	13523354	13525282	Sodium/calcium exchanger protein
POPTR_0001s16750	scaffold_1	13529366	13532112	Peptidase inhibitor I9	subtilase family protein; similar to cucumisin-like serine protease GI:3176874 from (Arabidopsis thaliana); [ ortholog of At3g14067,]
POPTR_0001s16760	scaffold_1	13534505	13536588		similar to ring box protein. [ORG:Populus tomentosa]; [ co-ortholog (2of2) of AAP57304, ]
POPTR_0001s16770	scaffold_1	13543309	13544087		similar to expressed protein in Arabidopsis thaliana; [ co-ortholog (1of2) of At1g54120, At3g14060, ]
POPTR_0001s16780	scaffold_1	13576191	13582156	PLAT/LH2 domain	similar to lipoxygenase; putative; similar to lipoxygenase gi:1495804 (Solanum tuberosum); similar to gi:1654140 (Lycopersicon esculentum); [ co-ortholog (1of2) of At1g72520, At1g17420, ]
POPTR_0001s16790	scaffold_1	13587079	13589399	Cytochrome P450	similar to unnamed protein product. [ORG:Euphorbia lagascae]; [ co-ortholog (3of5) of CAC09648, ]
POPTR_0001s16800	scaffold_1	13598000	13599958	Cytochrome P450
POPTR_0001s16810	scaffold_1	13612928	13614977	Protein kinase domain
POPTR_0001s16820	scaffold_1	13623100	13629978	Exportin 1-like protein	similar to PAUSED; [ co-ortholog (2of2) of At1g72560, ]
POPTR_0001s16825	scaffold_1	13637991	13640388
POPTR_0001s16830	scaffold_1	13650359	13654717	HD domain	similar to RELA/SPOT HOMOLOG 3; [ co-ortholog (2of4) of At1g54130, At3g14050, ]
POPTR_0001s16840	scaffold_1	13656187	13658310	Transcription initiation factor IID, 31kD subunit	similar to TATA BINDING PROTEIN ASSOCIATED FACTOR 21KDA SUBUNIT; [ co-ortholog (1of2) of At1g54140, ]
POPTR_0001s16850	scaffold_1	13660281	13661160
POPTR_0001s16860	scaffold_1	13669511	13669711
POPTR_0001s16870	scaffold_1	13675903	13677415	alpha/beta hydrolase fold	similar to hydrolase; alpha/beta fold family protein; similar to low similarity to BioH (Kurthia sp. 538-KA26) GI:13366133; similar to 2-hydroxy-6-ketonona-2; similar to 4-dienedioic acid hydrolase (Escherichia coli) GI:1702883; similar to alpha/beta fold
POPTR_0001s16880	scaffold_1	13677870	13680540	E3 Ubiquitin ligase	zinc finger (C3HC4-type RING finger) family protein; similar to C3HC4 type (RING finger); [ co-ortholog (2of2) of At1g54150, ]
POPTR_0001s16890	scaffold_1	13681056	13682726	GRAS family transcription factor
POPTR_0001s16900	scaffold_1	13683971	13684984
POPTR_0001s16910	scaffold_1	13688590	13689906	Cupin	similar to germin-like protein. [ORG:Linum usitatissimum]; [ co-ortholog (3of3) of AAK28807, ]
POPTR_0001s16920	scaffold_1	13708542	13709750	QLQ	similar to expressed protein in Arabidopsis thaliana; [ ortholog of At3g13960,At2g06200,]
POPTR_0001s16930	scaffold_1	13724225	13725008
POPTR_0001s16940	scaffold_1	13744480	13744800
POPTR_0001s16950	scaffold_1	13749460	13749636
POPTR_0001s16960	scaffold_1	13770610	13773745	AP2 domain	similar to ovule development protein; putative; similar to ovule development protein AINTEGUMENTA (GI:1209099) (Arabidopsis thaliana); similar to contains non-consensus TA acceptor splice site at exon 4; [ co-ortholog (1of2) of At1g72570, ]
POPTR_0001s16970	scaffold_1	13791230	13792321	Myb-like DNA-binding domain
POPTR_0001s16980	scaffold_1	13799234	13802068	Ubiquitin-like autophagy protein Apg12
POPTR_0001s16990	scaffold_1	13807990	13808910
POPTR_0001s17000	scaffold_1	13809903	13817254	Transcription initiation factor TFIID subunit A	transcription initiation factor IID (TFIID) subunit A family protein; similar to SP|Q16514|Transcription initiation factor TFIID 20 15/kDa subunits TAFII (20-TAFII/15-{Homo) {sapiens} ; [ co-ortholog (2of2) of At1g17440, ]
POPTR_0001s17005	scaffold_1	13833054	13833664
POPTR_0001s17010	scaffold_1	13833971	13835998	Protein of unknown function (DUF1313)	similar to expressed protein in Arabidopsis thaliana; [ co-ortholog (1of3) of At1g72630, At1g17455, ]
POPTR_0001s17020	scaffold_1	13850331	13857934	Myb-like DNA-binding domain	similar to myb family transcription factor; [ co-ortholog (1of2) of At1g72650, At1g17460, ]
POPTR_0001s17030	scaffold_1	13858721	13863960	GTPase of unknown function	similar to developmentally regulated GTP binding protein. [ORG:Pisum sativum]; [ co-ortholog (2of2) of AAB67829, At1g17470, At1g72660, ]
POPTR_0001s17040	scaffold_1	13874812	13876688	Snf7
POPTR_0001s17050	scaffold_1	13900135	13901777		similar to expressed protein in Arabidopsis thaliana; similar to hypothetical proteins - Arabidopsis thaliana; similar to expression supported by MPSS; [ co-ortholog (1of2) of At1g54200, At3g13980, At3g42800, ]
POPTR_0001s17060	scaffold_1	13906223	13906740
POPTR_0001s17070	scaffold_1	13915438	13924742	Protein of unknown function (DUF1296)	hydroxyproline-rich glycoprotein family protein; [ co-ortholog (1of2) of At3g13990, ]
POPTR_0001s17080	scaffold_1	13937797	13943175	Disease resistance/zinc finger/chromosome condensation-like region
POPTR_0001s17100	scaffold_1	13966323	13971856	Lecithin:cholesterol acyltransferase	lecithin:cholesterol acyltransferase family protein; LACT family protein; similar to SP|P40345|Phospholipid diacylglycerol:acyltransferase EC (2 3.1.158.PDAT) ({Saccharomyces) {cerevisiae} ; [ co-ortholog (2of2) of At5g13640, ]
POPTR_0001s17110	scaffold_1	13976599	13983632	LsmAD domain
POPTR_0001s17120	scaffold_1	13990311	13995170	Peptidase S24-like	similar to signal peptidase; putative; similar to SP|P13679|Microsomal signal peptidase 21 kDa subunit EC (3 4.{Canis.-.-) {familiaris} ; [ co-ortholog (2of2) of At3g15710, At1g52600, ]
POPTR_0001s17130	scaffold_1	13999761	14000920
POPTR_0001s17140	scaffold_1	14002390	14003142
POPTR_0001s17150	scaffold_1	14004090	14005059
POPTR_0001s17160	scaffold_1	14008294	14010000	Glyoxalase/Bleomycin resistance protein/Dioxygenase superfamily
POPTR_0001s17165	scaffold_1	14011330	14011668
POPTR_0001s17170	scaffold_1	14015854	14019283	Polypeptide deformylase	similar to PEPTIDE DEFORMYLASE 1A; [ ortholog of At1g15390,]
POPTR_0001s17180	scaffold_1	14029621	14034842	Glycosyl hydrolases family 28
POPTR_0001s17190	scaffold_1	14041882	14043003		similar to expressed protein in Arabidopsis thaliana; [ co-ortholog (2of2) of At1g15400, At1g80180, ]
POPTR_0001s17200	scaffold_1	14049214	14049650
POPTR_0001s17210	scaffold_1	14051551	14055425	Armadillo/beta-catenin-like repeat
POPTR_0001s17220	scaffold_1	14062460	14067081	Phosphatidylserine decarboxylase
POPTR_0001s17230	scaffold_1	14068988	14071796	EF hand
POPTR_0001s17240	scaffold_1	14072154	14072807
POPTR_0001s17250	scaffold_1	14074163	14075789
POPTR_0001s17260	scaffold_1	14078875	14080747
POPTR_0001s17270	scaffold_1	14086208	14092583
POPTR_0001s17280	scaffold_1	14100201	14101618	Zn-finger in Ran binding protein and others	zinc finger (Ran-binding) family protein; [ co-ortholog (1of2) of At3g15680, ]
POPTR_0001s17290	scaffold_1	14117024	14123507	Mov34/MPN/PAD-1 family
POPTR_0001s17300	scaffold_1	14129877	14130994		similar to late embryogenesis abundant protein-related; similar to LEA protein-related; similar to low similarity to late embryogenesis abundant proteins from (Brassica napus) SP|P13934; similar to (Cicer arietinum) GI:2909420; [ ortholog of At1g52680,]
POPTR_0001s17310	scaffold_1	14132760	14133652	Late embryogenesis abundant protein	similar to seed maturation protein PM30. [ORG:Glycine max]; [ ortholog of O49817,At3g15670,CAC39110,CAA12027,CAC39160,AAD30864,At1g52690,CAA12026,O49816,]
POPTR_0001s17320	scaffold_1	14135494	14138968	Ubiquitin-2 like Rad60 SUMO-like
POPTR_0001s17330	scaffold_1	14142214	14143167	Protein of unknown function (DUF1644)
POPTR_0001s17340	scaffold_1	14144435	14149394	WD domain, G-beta repeat	transducin family protein; WD-40 repeat family protein; similar to Strong similarity to gb X95263 Periodic tryptophan protein 2 gene (PWP2) from Homo sapiens and contains 6 WD40; similar to G-beta repeat domains; transducin family protein; WD-40 repeat fa
POPTR_0001s17350	scaffold_1	14156352	14161431	Tesmin/TSO1-like CXC domain	similar to cysteine-rich polycomb-like protein. [ORG:Glycine max]; [ co-ortholog (16of22) of CAF02297, CAF02298, CAA09028, ]
POPTR_0001s17360	scaffold_1	14162019	14165766	Phospholipase/Carboxylesterase	phospholipase/carboxylesterase family protein; similar to supported by full length cDNA gi:26450919 from (Arabidopsis thaliana); [ co-ortholog (1of2) of At3g15650, At1g52700, At1g51300, At1g52695, ]
POPTR_0001s17370	scaffold_1	14172858	14176861	Cytochrome c oxidase subunit Vb	similar to cytochrome c oxidase-related; similar to SP|P00428|Cytochrome c oxidase polypeptide Vb EC (1 9.3.1.6) (Bovine) ({Bos) {taurus} ; [ ortholog of At3g15640,At1g52710,]
POPTR_0001s17380	scaffold_1	14184320	14187008	Agenet domain
POPTR_0001s17390	scaffold_1	14188356	14188670
POPTR_0001s17400	scaffold_1	14190002	14205635	Peroxisome biogenesis factor 1, N-terminal
POPTR_0001s17410	scaffold_1	14204930	14205635
POPTR_0001s17420	scaffold_1	14210957	14211753
POPTR_0001s17430	scaffold_1	14226810	14228745	Protein of unknown function, DUF642	similar to hypothetical protein. [ORG:Cicer arietinum]; [ co-ortholog (4of7) of CAA06490, ]
POPTR_0001s17440	scaffold_1	14229582	14233331		anion exchange family protein; [ co-ortholog (1of2) of At1g15460, At1g74810, ]
POPTR_0001s17450	scaffold_1	14240192	14244757	WD domain, G-beta repeat	transducin family protein; WD-40 repeat family protein; similar to UNR-interacting protein (WD-40 repeat protein PT-WD) (SP:Q9Y3F4) (Homo sapiens); transducin family protein; WD-40 repeat family protein; similar to contains 7 WD; [ ortholog of At1g52730,]
POPTR_0001s17460	scaffold_1	14249507	14253509
POPTR_0001s17470	scaffold_1	14257095	14257566
POPTR_0001s17480	scaffold_1	14264509	14269801	alpha/beta hydrolase fold	similar to hydrolase; alpha/beta fold family protein; similar to alpha/beta fold family; [ co-ortholog (2of3) of At1g52750, At1g15490, At1g80280, ]
POPTR_0001s17490	scaffold_1	14284257	14284667
POPTR_0001s17500	scaffold_1	14289764	14291943	Putative lysophospholipase	esterase/lipase/thioesterase family protein; similar to low similarity to monoglyceride lipase from (Homo sapiens) GI:14594904; similar to (Mus musculus) GI:2632162; [ co-ortholog (2of2) of At1g52760, ]
POPTR_0001s17510	scaffold_1	14303836	14304126
POPTR_0001s17520	scaffold_1	14308031	14312368	TLC ATP/ADP transporter	similar to Chloroplast ADP; similar to ATP carrier protein 2; similar to chloroplast precursor (ADP/ATP translocase 2) (Adenine nucleotide translocase 2).; [ co-ortholog (2of2) of At1g80300, At1g15500, ]
POPTR_0001s17530	scaffold_1	14322601	14324903
POPTR_0001s17540	scaffold_1	14326099	14328670	NPH3 family
POPTR_0001s17550	scaffold_1	14330476	14333717
POPTR_0001s17560	scaffold_1	14338800	14342702	Protein of unknown function (DUF2921)	similar to expressed protein in Arabidopsis thaliana; [ ortholog of At1g52780,]
POPTR_0001s17570	scaffold_1	14349950	14357651	ABC transporter	ABC transporter family protein; similar to ABC1 protein GI:14331118 from (Nicotiana plumbaginifolia); [ ortholog of At1g15520,]
POPTR_0001s17580	scaffold_1	14382142	14383463	2OG-Fe(II) oxygenase superfamily
POPTR_0001s17610	scaffold_1	14416374	14417695	2OG-Fe(II) oxygenase superfamily
POPTR_0001s17620	scaffold_1	14431493	14432754	2OG-Fe(II) oxygenase superfamily	similar to oxidoreductase; 2OG-Fe(2) oxygenase family protein; similar to GS-AOP loci (GI:16118889; similar to GI:16118887; similar to GI:16118891; similar to GI:16118893); [ ortholog of At1g52790,]
POPTR_0001s17630	scaffold_1	14435684	14436919	2OG-Fe(II) oxygenase superfamily
POPTR_0001s17640	scaffold_1	14452136	14454159	2OG-Fe(II) oxygenase superfamily	similar to 2-oxoglutarate-dependent dioxygenase-related; similar to AOP1.2 (Arabidopsis thaliana) GI:16118887; [ ortholog of At4g03070,At1g52820,At1g52810,]
POPTR_0001s17650	scaffold_1	14459228	14460831
POPTR_0001s17660	scaffold_1	14468180	14468713
POPTR_0001s17670	scaffold_1	14482984	14484278	2OG-Fe(II) oxygenase superfamily

## Sheet: BM-2
Gene_Name	Chromosome_Name	Gene_Start	Gene_End	PFAM_Description
POPTR_0002s05370	scaffold_2	3503308	3505714	Cyclin
POPTR_0002s05380	scaffold_2	3510944	3512575	Leucine Rich Repeat
POPTR_0002s05390	scaffold_2	3513618	3516443
POPTR_0002s05400	scaffold_2	3518199	3520055
POPTR_0002s05410	scaffold_2	3522236	3523436
POPTR_0002s05420	scaffold_2	3525544	3531968	Dynamin family
POPTR_0002s05430	scaffold_2	3541658	3542845	Protein of unknown function (DUF3049)
POPTR_0002s05440	scaffold_2	3557699	3558388
POPTR_0002s05450	scaffold_2	3558687	3561884
POPTR_0002s05470	scaffold_2	3568309	3572336
POPTR_0002s05480	scaffold_2	3573849	3575028
POPTR_0002s05490	scaffold_2	3575377	3581317	eubacterial secY protein
POPTR_0002s05500	scaffold_2	3582384	3587533	DEAD_2
POPTR_0002s05510	scaffold_2	3589238	3595209	Helix-loop-helix DNA-binding domain
POPTR_0002s05520	scaffold_2	3608894	3609121
POPTR_0002s05530	scaffold_2	3610359	3612872	Aluminium activated malate transporter
POPTR_0002s05540	scaffold_2	3618844	3623833	Arabidopsis proteins of unknown function
POPTR_0002s05550	scaffold_2	3634888	3636806	F-box domain
POPTR_0002s05560	scaffold_2	3643668	3644392
POPTR_0002s05570	scaffold_2	3645435	3648086	LSM domain
POPTR_0002s05580	scaffold_2	3651195	3652795
POPTR_0002s05590	scaffold_2	3660962	3669894	B3 DNA binding domain
POPTR_0002s05600	scaffold_2	3673523	3676514	MatE
POPTR_0002s05610	scaffold_2	3678501	3684168	Tetratricopeptide repeat
POPTR_0002s05620	scaffold_2	3685085	3689463	Flavin containing amine oxidoreductase
POPTR_0002s05630	scaffold_2	3699803	3703855	Helix-loop-helix DNA-binding domain
POPTR_0002s05640	scaffold_2	3707765	3710987	Aldo/keto reductase family
POPTR_0002s05650	scaffold_2	3717608	3721381	Reticulon
POPTR_0002s05660	scaffold_2	3724623	3726732	PsbP
POPTR_0002s05670	scaffold_2	3727154	3737359	WD domain, G-beta repeat
POPTR_0002s05680	scaffold_2	3738597	3739676	Domain of unknown function (DUF1605)
POPTR_0002s05690	scaffold_2	3742309	3743047
POPTR_0002s05700	scaffold_2	3747925	3751631	NB-ARC domain
POPTR_0002s05710	scaffold_2	3753259	3754984	Ribosomal protein L7Ae/L30e/S12e/Gadd45 family
POPTR_0002s05720	scaffold_2	3755905	3756859
POPTR_0002s05730	scaffold_2	3757595	3758501
POPTR_0002s05740	scaffold_2	3763633	3765126	BTB/POZ domain
POPTR_0002s05750	scaffold_2	3772356	3774160	NPR1/NIM1 like defence protein C terminal
POPTR_0002s05760	scaffold_2	3775809	3779607	TLC domain
POPTR_0002s05770	scaffold_2	3782115	3785569	Myb-like DNA-binding domain
POPTR_0002s05780	scaffold_2	3791859	3795132	Squalene/phytoene synthase
POPTR_0002s05790	scaffold_2	3793277	3793575
POPTR_0002s05800	scaffold_2	3802005	3806271
POPTR_0002s05810	scaffold_2	3807906	3810175
POPTR_0002s05820	scaffold_2	3824585	3828107	No apical meristem (NAM) protein
POPTR_0002s05830	scaffold_2	3831132	3836156	PH domain
POPTR_0002s05840	scaffold_2	3841400	3843341	Glyoxalase/Bleomycin resistance protein/Dioxygenase superfamily
POPTR_0002s05850	scaffold_2	3843347	3844181
POPTR_0002s05860	scaffold_2	3846893	3847187	Auxin responsive protein
POPTR_0002s05870	scaffold_2	3851318	3853739	Ribosomal L18ae/LX protein domain
POPTR_0002s05880	scaffold_2	3856523	3861344	Enoyl-CoA hydratase/isomerase family
POPTR_0002s05890	scaffold_2	3884171	3891479	Vps16, N-terminal region
POPTR_0002s05900	scaffold_2	3896825	3899778
POPTR_0002s05910	scaffold_2	3901146	3902390
POPTR_0002s05920	scaffold_2	3904092	3907306
POPTR_0002s05930	scaffold_2	3909713	3910579	VQ motif
POPTR_0002s05940	scaffold_2	3916551	3921014	Golgi transport complex subunit 5
POPTR_0002s05950	scaffold_2	3921625	3922162
POPTR_0002s05960	scaffold_2	3929681	3936018
POPTR_0002s05970	scaffold_2	3939331	3956407	1,3-beta-glucan synthase component
POPTR_0002s05980	scaffold_2	3959174	3961362	RWP-RK domain
POPTR_0002s05990	scaffold_2	3971624	3976408	Protein kinase domain
POPTR_0002s06000	scaffold_2	3985135	3987714	WRKY DNA -binding domain
POPTR_0002s06010	scaffold_2	4005953	4007687	Ion channel
POPTR_0002s06020	scaffold_2	4013356	4021914	Protein of unknown function (DUF1296)
POPTR_0002s06030	scaffold_2	4022482	4023282	Domain of unknown function (DUF296)
POPTR_0002s06040	scaffold_2	4023633	4025419	PPR repeat
POPTR_0002s06050	scaffold_2	4027880	4031206	X8 domain
POPTR_0002s06060	scaffold_2	4038617	4042404	Phosphoribosyl transferase domain
POPTR_0002s06070	scaffold_2	4042502	4049513	RNA recognition motif. (a.k.a. RRM, RBD, or RNP domain)
POPTR_0002s06080	scaffold_2	4068178	4075691	Protein kinase domain
POPTR_0002s06090	scaffold_2	4081736	4082514
POPTR_0002s06100	scaffold_2	4088036	4089550
POPTR_0002s06110	scaffold_2	4091740	4095113
POPTR_0002s06120	scaffold_2	4096042	4097874	Glycosyl hydrolases family 16
POPTR_0002s06130	scaffold_2	4100781	4101936	Glycosyl hydrolases family 16
POPTR_0002s06140	scaffold_2	4103720	4106351	Protein of unknown function
POPTR_0002s06150	scaffold_2	4108695	4110514	Cytochrome P450
POPTR_0002s06160	scaffold_2	4116941	4118817
POPTR_0002s06170	scaffold_2	4134157	4136135	Cytochrome P450
POPTR_0002s06180	scaffold_2	4137598	4145091	ABC1 family
POPTR_0002s06190	scaffold_2	4148986	4152225	Shikimate kinase
POPTR_0002s06200	scaffold_2	4153348	4157674	RNA recognition motif. (a.k.a. RRM, RBD, or RNP domain)
POPTR_0002s06210	scaffold_2	4159318	4162637	No apical meristem (NAM) protein
POPTR_0002s06230	scaffold_2	4169111	4173090	Fatty acid hydroxylase superfamily
POPTR_0002s06240	scaffold_2	4176594	4178730	CS domain
POPTR_0002s06250	scaffold_2	4180843	4187029	tRNA pseudouridine synthase
POPTR_0002s06260	scaffold_2	4187400	4187710
POPTR_0002s06270	scaffold_2	4188865	4195024	DAHP synthetase I family
POPTR_0002s06280	scaffold_2	4195813	4198215	YGGT family
POPTR_0002s06290	scaffold_2	4198813	4201143	Methyltransferase domain
POPTR_0002s06300	scaffold_2	4203797	4205889
POPTR_0002s06310	scaffold_2	4208322	4212755	Ras family
POPTR_0002s06320	scaffold_2	4214954	4216815	Ubiquitin-2 like Rad60 SUMO-like
POPTR_0002s06330	scaffold_2	4218600	4221408	Protein of unknown function (DUF1475)
POPTR_0002s06340	scaffold_2	4225293	4229546	RNA recognition motif. (a.k.a. RRM, RBD, or RNP domain)
POPTR_0002s06350	scaffold_2	4230004	4231112
POPTR_0002s06360	scaffold_2	4233274	4233627
POPTR_0002s06370	scaffold_2	4234967	4235885
POPTR_0002s06380	scaffold_2	4240661	4243977	Leucine rich repeat N-terminal domain
POPTR_0002s06390	scaffold_2	4249120	4253633	S1 RNA binding domain
POPTR_0002s06400	scaffold_2	4270584	4276227	Endonuclease/Exonuclease/phosphatase family
POPTR_0002s06410	scaffold_2	4279186	4279799
POPTR_0002s06420	scaffold_2	4281209	4283961	Choline kinase N terminus
POPTR_0002s06430	scaffold_2	4288617	4290838	Alliinase EGF-like domain
POPTR_0002s06440	scaffold_2	4298692	4299023	Mitochondrial carrier protein
POPTR_0002s06450	scaffold_2	4310319	4313725	Alliinase EGF-like domain
POPTR_0002s06460	scaffold_2	4314214	4317092	Zinc carboxypeptidase
POPTR_0002s06470	scaffold_2	4318046	4318504	Auxin responsive protein
POPTR_0002s06480	scaffold_2	4320510	4320962	Auxin responsive protein
POPTR_0002s06490	scaffold_2	4330792	4342561
POPTR_0002s06500	scaffold_2	4344296	4345446	Ribosomal protein S13/S18
POPTR_0002s06510	scaffold_2	4346979	4347662
POPTR_0002s06520	scaffold_2	4348472	4351692	Triose-phosphate Transporter family
POPTR_0002s06540	scaffold_2	4353026	4357563
POPTR_0002s06550	scaffold_2	4367169	4370801
POPTR_0002s06560	scaffold_2	4371403	4373440
POPTR_0002s06570	scaffold_2	4376645	4379924	Protein kinase domain
POPTR_0002s06580	scaffold_2	4382306	4382915	Domain of unknown function (DUF3511)
POPTR_0002s06590	scaffold_2	4396887	4399252	Peroxidase
POPTR_0002s06600	scaffold_2	4408435	4410008	Protein kinase domain
POPTR_0002s06610	scaffold_2	4425835	4430497	DHHC zinc finger domain
POPTR_0002s06620	scaffold_2	4437010	4439212	AP2 domain
POPTR_0002s06630	scaffold_2	4459071	4460280
POPTR_0002s06640	scaffold_2	4462840	4466507	Protein of unknown function (DUF502)
POPTR_0002s06650	scaffold_2	4467109	4467539
POPTR_0002s06660	scaffold_2	4468113	4474882	RNA recognition motif. (a.k.a. RRM, RBD, or RNP domain)
POPTR_0002s06670	scaffold_2	4484836	4488805	Alba
POPTR_0002s06680	scaffold_2	4490558	4493497	Ribosomal protein L3
POPTR_0002s06690	scaffold_2	4497411	4498019	Plant invertase/pectin methylesterase inhibitor
POPTR_0002s06700	scaffold_2	4500949	4510049	SAP domain
POPTR_0002s06710	scaffold_2	4510833	4517271	PHD-finger
POPTR_0002s06720	scaffold_2	4530836	4531105
POPTR_0002s06730	scaffold_2	4531727	4536191	Thioredoxin
POPTR_0002s06750	scaffold_2	4537485	4540859
POPTR_0002s06760	scaffold_2	4541876	4542634	Alginate lyase
POPTR_0002s06770	scaffold_2	4544464	4553365	Glycosyltransferase family 28 N-terminal domain
POPTR_0002s06785	scaffold_2	4556976	4557524
POPTR_0002s06790	scaffold_2	4563453	4565179
POPTR_0002s06800	scaffold_2	4570987	4575653	bZIP transcription factor
POPTR_0002s06810	scaffold_2	4576036	4577111
POPTR_0002s06820	scaffold_2	4579860	4581697
POPTR_0002s06830	scaffold_2	4584180	4585602	Hsp20/alpha crystallin family
POPTR_0002s06840	scaffold_2	4589187	4590936	Protein of unknown function (DUF793)
POPTR_0002s06850	scaffold_2	4601235	4608697
POPTR_0002s06860	scaffold_2	4611122	4611852
POPTR_0002s06870	scaffold_2	4621892	4622588
POPTR_0002s06880	scaffold_2	4624510	4628237	F-box domain
POPTR_0002s06890	scaffold_2	4635275	4638584	EamA-like transporter family
POPTR_0002s06900	scaffold_2	4659490	4662456
POPTR_0002s06910	scaffold_2	4668587	4669937
POPTR_0002s06920	scaffold_2	4671474	4674244
POPTR_0002s06930	scaffold_2	4683576	4685859
POPTR_0002s06940	scaffold_2	4688764	4691186	LSM domain
POPTR_0002s06950	scaffold_2	4692124	4703259
POPTR_0002s06960	scaffold_2	4704260	4709270	Fructose-1-6-bisphosphatase
POPTR_0002s06970	scaffold_2	4715399	4722081	Ubiquitin interaction motif
POPTR_0002s06980	scaffold_2	4723310	4727327	Ubiquinol-cytochrome C reductase hinge protein
POPTR_0002s06990	scaffold_2	4729219	4730359	Ubiquinol-cytochrome C reductase hinge protein
POPTR_0002s07000	scaffold_2	4730858	4731903	VIT family
POPTR_0002s07020	scaffold_2	4752004	4756953	Basic region leucine zipper
POPTR_0002s07030	scaffold_2	4761758	4764118	Cytochrome P450
POPTR_0002s07040	scaffold_2	4766259	4766851
POPTR_0002s07050	scaffold_2	4767271	4770301
POPTR_0002s07060	scaffold_2	4779803	4781153	F-box domain
POPTR_0002s07070	scaffold_2	4793473	4805531	ACT domain
POPTR_0002s07080	scaffold_2	4812337	4814139
POPTR_0002s07090	scaffold_2	4822420	4824571	RNA recognition motif. (a.k.a. RRM, RBD, or RNP domain)
POPTR_0002s07100	scaffold_2	4827127	4829836	BED zinc finger
POPTR_0002s07110	scaffold_2	4845579	4852033	Regulator of chromosome condensation (RCC1) repeat
POPTR_0002s07120	scaffold_2	4854714	4854938
POPTR_0002s07130	scaffold_2	4859514	4860958	U-box domain
POPTR_0002s07140	scaffold_2	4876584	4877813	VQ motif
POPTR_0002s07150	scaffold_2	4884773	4886065	Dof domain, zinc finger
POPTR_0002s07160	scaffold_2	4887902	4890585
POPTR_0002s07170	scaffold_2	4897952	4901785	Leucine rich repeat N-terminal domain
POPTR_0002s07180	scaffold_2	4903928	4907595	Redoxin
POPTR_0002s07190	scaffold_2	4915262	4917085	Glycolipid transfer protein (GLTP)
POPTR_0002s07200	scaffold_2	4917543	4918782
POPTR_0002s07210	scaffold_2	4919201	4921992
POPTR_0002s07220	scaffold_2	4926112	4930730	Domain of unknown function
POPTR_0002s07230	scaffold_2	4937029	4937955	Protein of unknown function (DUF506)
POPTR_0002s07240	scaffold_2	4941616	4946974	Sec1 family
POPTR_0002s07250	scaffold_2	4951110	4953104	Uncharacterised BCR, YhbC family COG0779
POPTR_0002s07260	scaffold_2	4962265	4966648	Serine carboxypeptidase
POPTR_0002s07270	scaffold_2	4969027	4972190	Arabidopsis proteins of unknown function
POPTR_0002s07280	scaffold_2	4973075	4973665
POPTR_0002s07290	scaffold_2	4980219	4983849	Alcohol dehydrogenase GroES-like domain
POPTR_0002s07300	scaffold_2	4987020	4989309	Membrane transport protein
POPTR_0002s07310	scaffold_2	4991568	4993257	Membrane transport protein
POPTR_0002s07320	scaffold_2	4999872	5002724	Exostosin family
POPTR_0002s07330	scaffold_2	5003242	5005072
POPTR_0002s07340	scaffold_2	5005253	5006979	PPR repeat
POPTR_0002s07350	scaffold_2	5018653	5020927	MtN3/saliva family
POPTR_0002s07360	scaffold_2	5025976	5028151	MtN3/saliva family
POPTR_0002s07370	scaffold_2	5039216	5041946	MtN3/saliva family
POPTR_0002s07380	scaffold_2	5055859	5063576
POPTR_0002s07390	scaffold_2	5064013	5065165	Thioredoxin
POPTR_0002s07400	scaffold_2	5066140	5067497	Protein kinase domain
POPTR_0002s07410	scaffold_2	5068676	5071437	Shwachman-Bodian-Diamond syndrome (SBDS) protein
POPTR_0002s07420	scaffold_2	5072188	5074401
POPTR_0002s07430	scaffold_2	5075296	5077237	GRAS family transcription factor
POPTR_0002s07440	scaffold_2	5093943	5095520	Myb-like DNA-binding domain
POPTR_0002s07450	scaffold_2	5100070	5101629
POPTR_0002s07460	scaffold_2	5104456	5105416	Plastocyanin-like domain
POPTR_0002s07470	scaffold_2	5106958	5107266
POPTR_0002s07480	scaffold_2	5109705	5110961
POPTR_0002s07490	scaffold_2	5116947	5117366	BED zinc finger
POPTR_0002s07500	scaffold_2	5121850	5122871
POPTR_0002s07510	scaffold_2	5127785	5130391	Ras family
POPTR_0002s07520	scaffold_2	5134091	5137974	Protein phosphatase 2C
POPTR_0002s07530	scaffold_2	5140676	5144377	DnaJ domain
POPTR_0002s07540	scaffold_2	5145210	5148188	F-box domain
POPTR_0002s07550	scaffold_2	5150959	5157319	ACT domain
POPTR_0002s07560	scaffold_2	5169595	5174813	Dehydrogenase E1 component
POPTR_0002s07570	scaffold_2	5178856	5181481	PPR repeat
POPTR_0002s07580	scaffold_2	5183420	5185465	PPR repeat
POPTR_0002s07590	scaffold_2	5187128	5189641	PPR repeat
POPTR_0002s07600	scaffold_2	5195753	5196970
POPTR_0002s07610	scaffold_2	5200598	5206576	VHS domain
POPTR_0002s07620	scaffold_2	5210364	5210772
POPTR_0002s07630	scaffold_2	5213700	5215876
POPTR_0002s07640	scaffold_2	5219502	5224626	Putative methyltransferase
POPTR_0002s07650	scaffold_2	5229691	5233197	EGF-like domain
POPTR_0002s07660	scaffold_2	5237454	5240768	EGF-like domain
POPTR_0002s07670	scaffold_2	5253409	5256765	EGF-like domain
POPTR_0002s07680	scaffold_2	5258267	5259473
POPTR_0002s07690	scaffold_2	5268310	5268697
POPTR_0002s07700	scaffold_2	5281032	5281556
POPTR_0002s07710	scaffold_2	5286062	5286629
POPTR_0002s07720	scaffold_2	5293946	5296902	Tetratricopeptide repeat
POPTR_0002s07730	scaffold_2	5297339	5299398	Dimerisation domain
POPTR_0002s07740	scaffold_2	5300095	5304335	C1-like domain
POPTR_0002s07750	scaffold_2	5309165	5311157	BTB/POZ domain
POPTR_0002s07760	scaffold_2	5311383	5316029	Putative methyltransferase
POPTR_0002s07770	scaffold_2	5321731	5325658	haloacid dehalogenase-like hydrolase
POPTR_0002s07780	scaffold_2	5333665	5334395	EF hand
POPTR_0002s07790	scaffold_2	5335451	5342056
POPTR_0002s07800	scaffold_2	5346649	5350197
POPTR_0002s07810	scaffold_2	5352353	5361959	Zinc finger C-x8-C-x5-C-x3-H type (and similar)
POPTR_0002s07820	scaffold_2	5363519	5367447	Universal stress protein family
POPTR_0002s07830	scaffold_2	5377315	5388022	SecA DEAD-like domain
POPTR_0002s07840	scaffold_2	5388957	5391218
POPTR_0002s07850	scaffold_2	5392811	5393593
POPTR_0002s07860	scaffold_2	5394516	5397090
POPTR_0002s07870	scaffold_2	5402037	5404497
POPTR_0002s07880	scaffold_2	5414072	5415875	2OG-Fe(II) oxygenase superfamily
POPTR_0002s07890	scaffold_2	5416848	5423627	ATP-NAD kinase
POPTR_0002s07900	scaffold_2	5429507	5436770
POPTR_0002s07910	scaffold_2	5441801	5444813
POPTR_0002s07920	scaffold_2	5450756	5453302	SRF-type transcription factor (DNA-binding and dimerisation domain)
POPTR_0002s07930	scaffold_2	5458482	5476379	CW-type Zinc Finger
POPTR_0002s07940	scaffold_2	5483001	5488142
POPTR_0002s07950	scaffold_2	5488538	5489127
POPTR_0002s07960	scaffold_2	5494188	5496695	Transmembrane amino acid transporter protein
POPTR_0002s07970	scaffold_2	5510895	5513059	Transmembrane amino acid transporter protein
POPTR_0002s07980	scaffold_2	5521511	5525817	Peptidase S24-like
POPTR_0002s08000	scaffold_2	5529186	5531390	Transmembrane amino acid transporter protein
POPTR_0002s08010	scaffold_2	5544078	5546508	WD40-like Beta Propeller Repeat
POPTR_0002s08020	scaffold_2	5546571	5550705	Cyclin, N-terminal domain
POPTR_0002s08030	scaffold_2	5554444	5557940	ATPase family associated with various cellular activities (AAA)
POPTR_0002s08040	scaffold_2	5561976	5563896	Transmembrane amino acid transporter protein
POPTR_0002s08050	scaffold_2	5567936	5568930
POPTR_0002s08060	scaffold_2	5573096	5577482	ATPase family associated with various cellular activities (AAA)
POPTR_0002s08070	scaffold_2	5579253	5579897
POPTR_0002s08080	scaffold_2	5581295	5582641	PPR repeat
POPTR_0002s08090	scaffold_2	5587622	5591675	Natural resistance-associated macrophage protein
POPTR_0002s08100	scaffold_2	5593048	5597157	Natural resistance-associated macrophage protein
POPTR_0002s08110	scaffold_2	5598435	5604598	SWIRM domain
POPTR_0002s08115	scaffold_2	5607812	5611199	BED zinc finger
POPTR_0002s08120	scaffold_2	5613641	5619674	Glycosyl hydrolases family 35
POPTR_0002s08130	scaffold_2	5621718	5625126	Proteasome subunit
POPTR_0002s08140	scaffold_2	5628664	5629488	PHD-finger
POPTR_0002s08150	scaffold_2	5645165	5646959	No apical meristem (NAM) protein
POPTR_0002s08160	scaffold_2	5649646	5652291	Armadillo/beta-catenin-like repeat
POPTR_0002s08170	scaffold_2	5653472	5657125	ATPase family associated with various cellular activities (AAA)
POPTR_0002s08180	scaffold_2	5666674	5677991	Kinesin motor domain
POPTR_0002s08190	scaffold_2	5678622	5682052
POPTR_0002s08200	scaffold_2	5684349	5685237
POPTR_0002s08210	scaffold_2	5686086	5694560	Ubiquitin carboxyl-terminal hydrolase
POPTR_0002s08220	scaffold_2	5699868	5701528	DnaJ C terminal region
POPTR_0002s08230	scaffold_2	5702072	5707699	Aldehyde dehydrogenase family
POPTR_0002s08240	scaffold_2	5719526	5723456	Peroxidase
POPTR_0002s08250	scaffold_2	5737676	5741927	Protein of unknown function (DUF630)
POPTR_0002s08260	scaffold_2	5747245	5751684	Thioredoxin
POPTR_0002s08270	scaffold_2	5754692	5757437	Response regulator receiver domain
POPTR_0002s08280	scaffold_2	5776199	5781249	Delta-aminolevulinic acid dehydratase
POPTR_0002s08300	scaffold_2	5782016	5787172	Peptidase family M20/M25/M40
POPTR_0002s08310	scaffold_2	5802537	5806196	F-box domain
POPTR_0002s08320	scaffold_2	5806795	5807500
POPTR_0002s08330	scaffold_2	5808194	5810262	ATP synthase subunit C
POPTR_0002s08340	scaffold_2	5816014	5818690	BTB/POZ domain
POPTR_0002s08350	scaffold_2	5819427	5823451
POPTR_0002s08360	scaffold_2	5825599	5826247	Zinc finger, C3HC4 type (RING finger)
POPTR_0002s08370	scaffold_2	5832539	5834001
POPTR_0002s08380	scaffold_2	5834118	5837379	Rieske [2Fe-2S] domain
POPTR_0002s08390	scaffold_2	5843378	5845163	TLC domain
POPTR_0002s08400	scaffold_2	5846856	5851234	Plant protein of unknown function (DUF869)
POPTR_0002s08410	scaffold_2	5859708	5861747
POPTR_0002s08420	scaffold_2	5864050	5865820
POPTR_0002s08430	scaffold_2	5876454	5879074	GDSL-like Lipase/Acylhydrolase
POPTR_0002s08440	scaffold_2	5882420	5884531
POPTR_0002s08450	scaffold_2	5891443	5898014	AMP-binding enzyme
POPTR_0002s08460	scaffold_2	5902694	5903855
POPTR_0002s08470	scaffold_2	5905543	5924159	HEAT repeat
POPTR_0002s08480	scaffold_2	5925899	5927375
POPTR_0002s08490	scaffold_2	5931884	5936153	EamA-like transporter family
POPTR_0002s08500	scaffold_2	5936507	5938080	Universal stress protein family
POPTR_0002s08510	scaffold_2	5946150	5952977
POPTR_0002s08520	scaffold_2	5957674	5958672
POPTR_0002s08530	scaffold_2	5962851	5965495	LysM domain
POPTR_0002s08540	scaffold_2	5968227	5970911
POPTR_0002s08550	scaffold_2	5974339	5978472	Histone chaperone domain CHZ
POPTR_0002s08560	scaffold_2	5980304	5983087	EamA-like transporter family
POPTR_0002s08570	scaffold_2	5994856	5995494	Glutaredoxin-like domain (DUF836)
POPTR_0002s08580	scaffold_2	5999626	6002644	emp24/gp25L/p24 family/GOLD
POPTR_0002s08590	scaffold_2	6005331	6008621	Peptidase family M20/M25/M40
POPTR_0002s08600	scaffold_2	6011550	6015558	Peptidase family M20/M25/M40
POPTR_0002s08610	scaffold_2	6023692	6024520	AP2 domain
POPTR_0002s08620	scaffold_2	6032798	6035366	YbaK / prolyl-tRNA synthetases associated domain
POPTR_0002s08630	scaffold_2	6036662	6037762	Zinc finger, C3HC4 type (RING finger)
POPTR_0002s08640	scaffold_2	6048881	6051297	MORN repeat
POPTR_0002s08650	scaffold_2	6058988	6061566	Aminotransferase class I and II
POPTR_0002s08660	scaffold_2	6071049	6072615	GRAS family transcription factor
POPTR_0002s08670	scaffold_2	6080896	6081826
POPTR_0002s08680	scaffold_2	6082002	6083327
POPTR_0002s08690	scaffold_2	6086898	6092391	RNB domain
POPTR_0002s08700	scaffold_2	6106082	6109725	D-mannose binding lectin
POPTR_0002s08710	scaffold_2	6115236	6117457	Protein of unknown function (DUF2763)
POPTR_0002s08720	scaffold_2	6120846	6122534	2OG-Fe(II) oxygenase superfamily
POPTR_0002s08730	scaffold_2	6124704	6128488	CrcB-like protein
POPTR_0002s08740	scaffold_2	6134549	6135103	Cold-shock' DNA-binding domain
POPTR_0002s08750	scaffold_2	6142502	6145503	Transmembrane amino acid transporter protein
POPTR_0002s08760	scaffold_2	6151009	6152761	Thaumatin family
POPTR_0002s08770	scaffold_2	6158925	6159261	Ubiquitin fold modifier 1 protein
POPTR_0002s08780	scaffold_2	6164285	6164356
POPTR_0002s08790	scaffold_2	6177076	6182986	GDP-fucose protein O-fucosyltransferase
POPTR_0002s08800	scaffold_2	6184650	6186725	PPR repeat
POPTR_0002s08810	scaffold_2	6192476	6194202	Zinc finger, C2H2 type
POPTR_0002s08820	scaffold_2	6200370	6204920	Protein kinase domain
POPTR_0002s08830	scaffold_2	6205968	6211687	Biotin/lipoate A/B protein ligase family
POPTR_0002s08840	scaffold_2	6212429	6212635
POPTR_0002s08850	scaffold_2	6226363	6227260
POPTR_0002s08870	scaffold_2	6228720	6238082	PH domain
POPTR_0002s08880	scaffold_2	6249555	6254219	MORN repeat
POPTR_0002s08890	scaffold_2	6280088	6282287	RNA recognition motif 2
POPTR_0002s08900	scaffold_2	6285325	6286771	Ribosomal protein S13/S18
POPTR_0002s08910	scaffold_2	6288115	6288587	Ribosomal protein S13/S18
POPTR_0002s08920	scaffold_2	6292736	6293572	EF hand

## Sheet: BM-3
Gene_Name	Chromosome_Name	Gene_Start	Gene_End	PFAM_Description
POPTR_0005s23180	scaffold_5	22011704	22017633
POPTR_0005s23190	scaffold_5	22027982	22033757	Terpene synthase, N-terminal domain
POPTR_0005s23200	scaffold_5	22037633	22040944	Acetyltransferase (GNAT) family
POPTR_0005s23210	scaffold_5	22044095	22050094
POPTR_0005s23220	scaffold_5	22053690	22056035	pre-mRNA processing factor 4 (PRP4) like
POPTR_0005s23230	scaffold_5	22060122	22062102
POPTR_0005s23240	scaffold_5	22065504	22067374	Plant protein of unknown function (DUF868)
POPTR_0005s23250	scaffold_5	22075445	22078877	Ras-induced vulval development antagonist
POPTR_0005s23260	scaffold_5	22084569	22085544
POPTR_0005s23270	scaffold_5	22094000	22102395	AT hook motif
POPTR_0005s23280	scaffold_5	22103694	22105141	Ribosomal protein S13/S18
POPTR_0005s23290	scaffold_5	22108535	22109382	Protein of unknown function, DUF623
POPTR_0005s23300	scaffold_5	22122225	22125174
POPTR_0005s23310	scaffold_5	22129118	22130439	Protein of unknown function (DUF581)
POPTR_0005s23320	scaffold_5	22142561	22145785	WD domain, G-beta repeat
POPTR_0005s23330	scaffold_5	22147303	22149266	F-box domain
POPTR_0005s23340	scaffold_5	22153447	22154430	Protease inhibitor/seed storage/LTP family
POPTR_0005s23350	scaffold_5	22157824	22158810	Protease inhibitor/seed storage/LTP family
POPTR_0005s23360	scaffold_5	22164962	22166160	Protease inhibitor/seed storage/LTP family
POPTR_0005s23370	scaffold_5	22166159	22166768
POPTR_0005s23380	scaffold_5	22169181	22169420	Pollen allergen ole e 6
POPTR_0005s23390	scaffold_5	22169587	22174247	Cupin
POPTR_0005s23410	scaffold_5	22176018	22178636	PPR repeat
POPTR_0005s23420	scaffold_5	22181184	22184211	Protein of unknown function (DUF581)
POPTR_0005s23430	scaffold_5	22194670	22195659
POPTR_0005s23440	scaffold_5	22195857	22198878	Endonuclease/Exonuclease/phosphatase family
POPTR_0005s23450	scaffold_5	22210153	22212610
POPTR_0005s23460	scaffold_5	22212758	22213365	OB-fold nucleic acid binding domain
POPTR_0005s23470	scaffold_5	22213440	22214718
POPTR_0005s23480	scaffold_5	22215234	22219509	Homocysteine S-methyltransferase
POPTR_0005s23490	scaffold_5	22220340	22224804	Protein tyrosine kinase
POPTR_0005s23500	scaffold_5	22229788	22237990	Carbamoyl-phosphate synthase L chain, N-terminal domain
POPTR_0005s23510	scaffold_5	22247664	22255950	KIP1-like protein
POPTR_0005s23520	scaffold_5	22256127	22256702
POPTR_0005s23530	scaffold_5	22262660	22267159	Sulfate transporter family
POPTR_0005s23540	scaffold_5	22271219	22271618
POPTR_0005s23550	scaffold_5	22290892	22294940	Plant protein of unknown function (DUF828)
POPTR_0005s23560	scaffold_5	22295284	22296521	Uncharacterised protein family UPF0005
POPTR_0005s23570	scaffold_5	22298171	22299784	Uncharacterised protein family UPF0005
POPTR_0005s23580	scaffold_5	22304600	22305209
POPTR_0005s23590	scaffold_5	22312397	22313955	Chlorophyllase
POPTR_0005s23600	scaffold_5	22320891	22325261	tify domain
POPTR_0005s23610	scaffold_5	22329008	22334739	Tetratricopeptide repeat
POPTR_0005s23620	scaffold_5	22337386	22338810	Protein phosphatase 2C
POPTR_0005s23630	scaffold_5	22339900	22350901	Protein phosphatase 2C
POPTR_0005s23640	scaffold_5	22360375	22363013	HSF-type DNA-binding
POPTR_0005s23650	scaffold_5	22370591	22371434
POPTR_0005s23660	scaffold_5	22380555	22385062	Zinc-finger double-stranded RNA-binding
POPTR_0005s23670	scaffold_5	22389928	22396448
POPTR_0005s23680	scaffold_5	22419871	22437119	Beige/BEACH domain
POPTR_0005s23690	scaffold_5	22437993	22440449	PPR repeat
POPTR_0005s23700	scaffold_5	22447037	22447219
POPTR_0005s23710	scaffold_5	22463559	22467046	Cation transporter/ATPase, N-terminus
POPTR_0005s23720	scaffold_5	22478961	22480133	EF hand
POPTR_0005s23730	scaffold_5	22485958	22492215	Cyclophilin type peptidyl-prolyl cis-trans isomerase/CLD
POPTR_0005s23740	scaffold_5	22494731	22498065	Methyltransferase domain
POPTR_0005s23750	scaffold_5	22503545	22505866	Ammonium Transporter Family
POPTR_0005s23760	scaffold_5	22507220	22509247
POPTR_0005s23770	scaffold_5	22510092	22512668	Agenet domain
POPTR_0005s23780	scaffold_5	22524453	22528739
POPTR_0005s23790	scaffold_5	22535256	22536002
POPTR_0005s23800	scaffold_5	22541724	22542601
POPTR_0005s23810	scaffold_5	22543545	22545234	Core histone H2A/H2B/H3/H4
POPTR_0005s23820	scaffold_5	22546846	22549734
POPTR_0005s23830	scaffold_5	22561108	22563047	Protein of unknown function (DUF506)
POPTR_0005s23840	scaffold_5	22575860	22577858	FAE1/Type III polyketide synthase-like protein
POPTR_0005s23850	scaffold_5	22580071	22580844
POPTR_0005s23860	scaffold_5	22581476	22581930
POPTR_0005s23870	scaffold_5	22588756	22589094
POPTR_0005s23880	scaffold_5	22590719	22600435	Guanylate-binding protein, N-terminal domain
POPTR_0005s23890	scaffold_5	22600857	22607377	Acetyltransferase (GNAT) family
POPTR_0005s23900	scaffold_5	22608005	22611531	bZIP transcription factor
POPTR_0005s23910	scaffold_5	22612332	22615222	ATP synthase (F/14-kDa) subunit
POPTR_0005s23920	scaffold_5	22616183	22619320	Tryptophan synthase alpha chain
POPTR_0005s23930	scaffold_5	22626607	22632210	Helix-loop-helix DNA-binding domain
POPTR_0005s23940	scaffold_5	22630441	22630873
POPTR_0005s23950	scaffold_5	22633336	22638094	Respiratory-chain NADH dehydrogenase 24 Kd subunit
POPTR_0005s23960	scaffold_5	22640114	22642135	Single-strand binding protein family
POPTR_0005s23970	scaffold_5	22643699	22644898	AUX/IAA family
POPTR_0005s23980	scaffold_5	22654046	22657629	AUX/IAA family
POPTR_0005s23990	scaffold_5	22660444	22665283	F-box domain
POPTR_0005s24000	scaffold_5	22676021	22679928	Lipase (class 3)
POPTR_0005s24010	scaffold_5	22681791	22683548	WD domain, G-beta repeat
POPTR_0005s24020	scaffold_5	22687727	22690640
POPTR_0005s24030	scaffold_5	22691001	22691970	Photosystem II reaction centre W protein (PsbW)
POPTR_0005s24040	scaffold_5	22692907	22697360	Glycosyl transferase family 8
POPTR_0005s24050	scaffold_5	22711579	22716519	Zinc finger, C3HC4 type (RING finger)
POPTR_0005s24060	scaffold_5	22719376	22720550	PRA1 family protein
POPTR_0005s24070	scaffold_5	22721514	22724434	Ankyrin repeat
POPTR_0005s24080	scaffold_5	22725438	22728040	Transmembrane amino acid transporter protein
POPTR_0005s24090	scaffold_5	22734317	22735496
POPTR_0005s24100	scaffold_5	22744409	22746663	Plant zinc cluster domain
POPTR_0005s24110	scaffold_5	22751232	22751759	AP2 domain
POPTR_0005s24120	scaffold_5	22755220	22758065	Ribosomal protein S19
POPTR_0005s24130	scaffold_5	22767258	22768646	linker histone H1 and H5 family
POPTR_0005s24140	scaffold_5	22773814	22777484	Zeta toxin
POPTR_0005s24150	scaffold_5	22778554	22779845	PPR repeat
POPTR_0005s24160	scaffold_5	22783645	22785376
POPTR_0005s24170	scaffold_5	22791854	22795814	pfkB family carbohydrate kinase
POPTR_0005s24180	scaffold_5	22796193	22800584	CobQ/CobB/MinD/ParA nucleotide binding domain
POPTR_0005s24190	scaffold_5	22803664	22807485	Protein of unknown function, DUF593
POPTR_0005s24200	scaffold_5	22811974	22813915	Cytochrome P450
POPTR_0005s24210	scaffold_5	22814133	22814670
POPTR_0005s24220	scaffold_5	22835967	22837828	Cytochrome P450
POPTR_0005s24230	scaffold_5	22848332	22849074	Potato inhibitor I family
POPTR_0005s24240	scaffold_5	22872275	22874756	Helix-loop-helix DNA-binding domain
POPTR_0005s24250	scaffold_5	22875591	22876135
POPTR_0005s24270	scaffold_5	22877797	22882153	F-box domain
POPTR_0005s24280	scaffold_5	22885202	22885792	Zinc-finger double-stranded RNA-binding
POPTR_0005s24290	scaffold_5	22891506	22892522	Zinc-finger double-stranded RNA-binding
POPTR_0005s24300	scaffold_5	22899384	22903253	SNARE domain
POPTR_0005s24310	scaffold_5	22906731	22909320	PBS lyase HEAT-like repeat
POPTR_0005s24320	scaffold_5	22912552	22913843	Protein of unknown function DUF260
POPTR_0005s24330	scaffold_5	22921711	22926131	Lipase (class 3)
POPTR_0005s24340	scaffold_5	22926283	22926599
POPTR_0005s24350	scaffold_5	22930374	22933287	HR-like lesion-inducing
POPTR_0005s24360	scaffold_5	22935535	22937209	2OG-Fe(II) oxygenase superfamily
POPTR_0005s24370	scaffold_5	22941078	22941617
POPTR_0005s24380	scaffold_5	22942504	22943361
POPTR_0005s24390	scaffold_5	22943687	22950368
POPTR_0005s24400	scaffold_5	22957390	22959611	EamA-like transporter family
POPTR_0005s24410	scaffold_5	22959972	22962944	DNA replication factor CDT1 like
POPTR_0005s24420	scaffold_5	22968304	22974435	Autophagy protein Apg9
POPTR_0005s24430	scaffold_5	22975382	22978454	Tetratricopeptide repeat
POPTR_0005s24440	scaffold_5	22982624	22984029	2OG-Fe(II) oxygenase superfamily
POPTR_0005s24450	scaffold_5	22987698	22988280	AP2 domain
POPTR_0005s24460	scaffold_5	22997527	22998637	AP2 domain

## Sheet: BM-4
Gene_Name	Chromosome_Name	Gene_Start	Gene_End	PFAM_Description
POPTR_0007s05540	scaffold_7	3606824	3613103	ABC transporter transmembrane region 2
POPTR_0007s05550	scaffold_7	3624496	3627677
POPTR_0007s05560	scaffold_7	3638580	3640291
POPTR_0007s05580	scaffold_7	3647918	3654288	Major Facilitator Superfamily
POPTR_0007s05590	scaffold_7	3655701	3658826	Major Facilitator Superfamily
POPTR_0007s05600	scaffold_7	3672360	3674022	VQ motif
POPTR_0007s05610	scaffold_7	3683034	3683633	G-patch domain
POPTR_0007s05620	scaffold_7	3690101	3690841
POPTR_0007s05630	scaffold_7	3691906	3695245	SCO1/SenC
POPTR_0007s05640	scaffold_7	3700011	3702844	Tetratricopeptide repeat
POPTR_0007s05650	scaffold_7	3710138	3711278	PLAT/LH2 domain
POPTR_0007s05660	scaffold_7	3715002	3715869	PLAT/LH2 domain
POPTR_0007s05670	scaffold_7	3743609	3746662	Trehalose-phosphatase
POPTR_0007s05680	scaffold_7	3809826	3810219
POPTR_0007s05690	scaffold_7	3822437	3823920	AP2 domain
POPTR_0007s05700	scaffold_7	3836982	3838802
POPTR_0007s05710	scaffold_7	3845429	3849785	Acyl-CoA dehydrogenase, middle domain
POPTR_0007s05730	scaffold_7	3851637	3859414	Protein of unknown function (DUF630)
POPTR_0007s05740	scaffold_7	3868377	3872491	Endonuclease/Exonuclease/phosphatase family
POPTR_0007s05750	scaffold_7	3881596	3882207	Pollen proteins Ole e I like
POPTR_0007s05760	scaffold_7	3884847	3886289	SAM dependent carboxyl methyltransferase
POPTR_0007s05770	scaffold_7	3917412	3921290	Cellulase (glycosyl hydrolase family 5)
POPTR_0007s05790	scaffold_7	3924884	3926241
POPTR_0007s05800	scaffold_7	3949637	3951439	Protein of unknown function (DUF581)
POPTR_0007s05810	scaffold_7	3962530	3965604	Myo-inositol-1-phosphate synthase
POPTR_0007s05840	scaffold_7	3983862	3984597	DnaJ domain
POPTR_0007s05850	scaffold_7	3987271	3987728
POPTR_0007s05860	scaffold_7	3999877	4003753	Sulfate transporter family
POPTR_0007s05870	scaffold_7	4010382	4011456	Exonuclease
POPTR_0007s05880	scaffold_7	4015532	4019675	Aminotransferase class I and II
POPTR_0007s05885	scaffold_7	4018204	4018491
POPTR_0007s05890	scaffold_7	4054272	4056453	Multicopper oxidase
POPTR_0007s05900	scaffold_7	4058018	4059020	Multicopper oxidase
POPTR_0007s05910	scaffold_7	4065349	4067813	Multicopper oxidase
POPTR_0007s05920	scaffold_7	4080115	4081675	Cytochrome P450
POPTR_0007s05930	scaffold_7	4095821	4096850
POPTR_0007s05940	scaffold_7	4099877	4101415	Cytochrome P450
POPTR_0007s05945	scaffold_7	4109874	4111663	Cytochrome P450
POPTR_0007s05950	scaffold_7	4112235	4112517
POPTR_0007s05960	scaffold_7	4114621	4116236	Cytochrome P450
POPTR_0007s05970	scaffold_7	4124711	4125280
POPTR_0007s05980	scaffold_7	4126423	4128527	SRF-type transcription factor (DNA-binding and dimerisation domain)
POPTR_0007s05990	scaffold_7	4133738	4136034	FKBP-type peptidyl-prolyl cis-trans isomerase
POPTR_0007s06000	scaffold_7	4138464	4139772	Heavy-metal-associated domain
POPTR_0007s06010	scaffold_7	4149506	4160952	PBS lyase HEAT-like repeat
POPTR_0007s06020	scaffold_7	4165573	4171255	Mitochondrial inner membrane protein
POPTR_0007s06030	scaffold_7	4185495	4187491
POPTR_0007s06040	scaffold_7	4189263	4194664	SAP domain
POPTR_0007s06050	scaffold_7	4197314	4199255	Ribosomal protein L7Ae/L30e/S12e/Gadd45 family
POPTR_0007s06060	scaffold_7	4207907	4211775	Protein of unknown function, DUF618
POPTR_0007s06070	scaffold_7	4211058	4212203
POPTR_0007s06080	scaffold_7	4214175	4221136	short chain dehydrogenase
POPTR_0007s06100	scaffold_7	4227633	4227887
POPTR_0007s06110	scaffold_7	4236672	4237159
POPTR_0007s06120	scaffold_7	4255767	4256258	PHD-finger
POPTR_0007s06130	scaffold_7	4277588	4278082	TFIIH C1-like domain
POPTR_0007s06140	scaffold_7	4287834	4288328	Zinc finger, C3HC4 type (RING finger)
POPTR_0007s06150	scaffold_7	4293100	4293796
POPTR_0007s06160	scaffold_7	4300957	4308002	Zinc finger, C3HC4 type (RING finger)
POPTR_0007s06170	scaffold_7	4328144	4329057
POPTR_0007s06180	scaffold_7	4347729	4353353	bZIP transcription factor
POPTR_0007s06190	scaffold_7	4354307	4358371	Aminotransferase class-III
POPTR_0007s06200	scaffold_7	4369027	4371384	PPR repeat
POPTR_0007s06210	scaffold_7	4375903	4380305	Protein kinase domain
POPTR_0007s06220	scaffold_7	4389244	4389959	KOW motif
POPTR_0007s06230	scaffold_7	4391788	4394621
POPTR_0007s06240	scaffold_7	4399587	4402458	Cytochrome P450
POPTR_0007s06250	scaffold_7	4403347	4411625	HEAT repeat
POPTR_0007s06260	scaffold_7	4415634	4417246	Cytochrome P450
POPTR_0007s06270	scaffold_7	4433882	4435477	Cytochrome P450
POPTR_0007s06280	scaffold_7	4436256	4436572	Zinc finger, C3HC4 type (RING finger)
POPTR_0007s06290	scaffold_7	4444059	4446121
POPTR_0007s06300	scaffold_7	4453089	4454470	Cytochrome P450
POPTR_0007s06310	scaffold_7	4474865	4476682	Cytochrome P450
POPTR_0007s06320	scaffold_7	4477082	4477542	Zinc finger, C3HC4 type (RING finger)
POPTR_0007s06330	scaffold_7	4534523	4535032
POPTR_0007s06340	scaffold_7	4540372	4541762
POPTR_0007s06350	scaffold_7	4546920	4547150
POPTR_0007s06360	scaffold_7	4559349	4560928	Cytochrome P450
POPTR_0007s06370	scaffold_7	4571001	4572580	Cytochrome P450
POPTR_0007s06380	scaffold_7	4625867	4626492
POPTR_0007s06390	scaffold_7	4701232	4702805	Cytochrome P450
POPTR_0007s06400	scaffold_7	4721606	4723179	Cytochrome P450
POPTR_0007s06410	scaffold_7	4739558	4741137	Cytochrome P450
POPTR_0007s06430	scaffold_7	4746941	4753391	Leucine rich repeat N-terminal domain
POPTR_0007s06440	scaffold_7	4777219	4777479
POPTR_0007s06450	scaffold_7	4800813	4811553	ABC1 family
POPTR_0007s06460	scaffold_7	4822324	4829924	Leucine rich repeat N-terminal domain
POPTR_0007s06470	scaffold_7	4838956	4842379	Leucine rich repeat N-terminal domain
POPTR_0007s06480	scaffold_7	4850645	4851509	Histone-like transcription factor (CBF/NF-Y) and archaeal histone
POPTR_0007s06490	scaffold_7	4859520	4864403
POPTR_0007s06500	scaffold_7	4863243	4869788
POPTR_0007s06510	scaffold_7	4883267	4895052	SPRY domain
POPTR_0007s06520	scaffold_7	4897723	4899680
POPTR_0007s06530	scaffold_7	4903947	4906896
POPTR_0007s06540	scaffold_7	4923292	4925241
POPTR_0007s06550	scaffold_7	4932551	4939332	4-alpha-glucanotransferase
POPTR_0007s06560	scaffold_7	4955204	4965737	RNA dependent RNA polymerase
POPTR_0007s06570	scaffold_7	4978173	4980091	Cytochrome P450
POPTR_0007s06580	scaffold_7	4996247	4997665	F-box domain
POPTR_0007s06590	scaffold_7	5000432	5003602	Shikimate kinase
POPTR_0007s06600	scaffold_7	5015036	5022058	GTPase of unknown function
POPTR_0007s06610	scaffold_7	5026083	5028774	Cleavage site for pathogenic type III effector avirulence factor Avr
POPTR_0007s06620	scaffold_7	5032448	5039181	ABC transporter
POPTR_0007s06630	scaffold_7	5036269	5036890
POPTR_0007s06650	scaffold_7	5046855	5051582	Programmed cell death protein 2, C-terminal putative domain
POPTR_0007s06660	scaffold_7	5052086	5054762	RNA polymerase Rpb4
POPTR_0007s06670	scaffold_7	5066673	5068410	Cytochrome P450
POPTR_0007s06680	scaffold_7	5076681	5077094
POPTR_0007s06690	scaffold_7	5077400	5082993	Miro-like protein
POPTR_0007s06700	scaffold_7	5084961	5087102
POPTR_0007s06710	scaffold_7	5088251	5090177
POPTR_0007s06720	scaffold_7	5097031	5099587	WRKY DNA -binding domain
POPTR_0007s06730	scaffold_7	5112959	5115394	Ras family
POPTR_0007s06740	scaffold_7	5122735	5123424	Iron-sulphur cluster biosynthesis
POPTR_0007s06750	scaffold_7	5124904	5125255
POPTR_0007s06760	scaffold_7	5125999	5126704
POPTR_0007s06770	scaffold_7	5132937	5137599
POPTR_0007s06780	scaffold_7	5142735	5144264	PPR repeat
POPTR_0007s06790	scaffold_7	5145489	5156032	Domain of unknown function (DUF1726)
POPTR_0007s06800	scaffold_7	5156852	5161111	Tetratricopeptide repeat
POPTR_0007s06805	scaffold_7	5162067	5162806
POPTR_0007s06810	scaffold_7	5165848	5166415
POPTR_0007s06820	scaffold_7	5166788	5168358	Glycosyl hydrolases family 17
POPTR_0007s06840	scaffold_7	5170392	5192953
POPTR_0007s06860	scaffold_7	5196464	5200662
POPTR_0007s06890	scaffold_7	5209389	5210370	A20-like zinc finger
POPTR_0007s06900	scaffold_7	5214162	5217520	Radical SAM superfamily
POPTR_0007s06910	scaffold_7	5219368	5220165
POPTR_0007s06920	scaffold_7	5246049	5246680
POPTR_0007s06930	scaffold_7	5283483	5287169	WRKY DNA -binding domain
POPTR_0007s06940	scaffold_7	5298769	5302646	Leucine rich repeat N-terminal domain
POPTR_0007s06950	scaffold_7	5317314	5322215	Triose-phosphate Transporter family
POPTR_0007s06960	scaffold_7	5326010	5327771
POPTR_0007s06970	scaffold_7	5330517	5332754
POPTR_0007s06980	scaffold_7	5333616	5335915	Protein kinase domain
POPTR_0007s06990	scaffold_7	5338286	5339131	Domain of unknown function (DUF3511)
POPTR_0007s07000	scaffold_7	5340569	5349791	ERCC4 domain
POPTR_0007s07020	scaffold_7	5357072	5357805
POPTR_0007s07030	scaffold_7	5361808	5362138
POPTR_0007s07040	scaffold_7	5368335	5374209	Ubiquitin carboxyl-terminal hydrolase
POPTR_0007s07050	scaffold_7	5389134	5391999	DHHC zinc finger domain
POPTR_0007s07060	scaffold_7	5392074	5392301
POPTR_0007s07070	scaffold_7	5396366	5396779
POPTR_0007s07080	scaffold_7	5403518	5409510	PCI domain
POPTR_0007s07090	scaffold_7	5410722	5411959	AP2 domain
POPTR_0007s07100	scaffold_7	5421894	5427810	ATP cone domain
POPTR_0007s07110	scaffold_7	5433748	5434957
POPTR_0007s07120	scaffold_7	5448736	5455893	Cellulose synthase
POPTR_0007s07130	scaffold_7	5479013	5479450
POPTR_0007s07140	scaffold_7	5480218	5484146	EF hand
POPTR_0007s07150	scaffold_7	5496454	5501862	Myb-like DNA-binding domain
POPTR_0007s07170	scaffold_7	5511743	5512856	Cathepsin propeptide inhibitor domain (I29)
POPTR_0007s07180	scaffold_7	5513856	5514080
POPTR_0007s07190	scaffold_7	5518492	5519605	Cathepsin propeptide inhibitor domain (I29)
POPTR_0007s07200	scaffold_7	5532089	5533202	Cathepsin propeptide inhibitor domain (I29)
POPTR_0007s07210	scaffold_7	5546382	5546834
POPTR_0007s07220	scaffold_7	5549233	5550920	GRAM domain
POPTR_0007s07230	scaffold_7	5552087	5552652
POPTR_0007s07240	scaffold_7	5560489	5561792	Cathepsin propeptide inhibitor domain (I29)
POPTR_0007s07250	scaffold_7	5562189	5566909	Eukaryotic protein of unknown function (DUF829)
POPTR_0007s07260	scaffold_7	5567501	5570412	FAD synthetase
POPTR_0007s07270	scaffold_7	5579815	5581540	Leucine Rich Repeat
POPTR_0007s07280	scaffold_7	5583898	5585250	GRAM domain
POPTR_0007s07290	scaffold_7	5591124	5592236	Cathepsin propeptide inhibitor domain (I29)
POPTR_0007s07300	scaffold_7	5600594	5603033	Cytochrome P450
POPTR_0007s07310	scaffold_7	5643850	5645932	Cytochrome P450
POPTR_0007s07320	scaffold_7	5662804	5672850	Myosin head (motor domain)
POPTR_0007s07330	scaffold_7	5685527	5686720	Peroxidase
POPTR_0007s07340	scaffold_7	5687720	5688727
POPTR_0007s07350	scaffold_7	5688834	5690368	Isoprenylcysteine carboxyl methyltransferase (ICMT) family
POPTR_0007s07360	scaffold_7	5698950	5703035	Terpene synthase, N-terminal domain
POPTR_0007s07370	scaffold_7	5718981	5720535	Terpene synthase, N-terminal domain
POPTR_0007s07380	scaffold_7	5725305	5725619
POPTR_0007s07390	scaffold_7	5725697	5727136
POPTR_0007s07410	scaffold_7	5732817	5736144	Terpene synthase, N-terminal domain
POPTR_0007s07420	scaffold_7	5761936	5764000	Cytochrome P450
POPTR_0007s07430	scaffold_7	5778944	5783089	Dihydroorotate dehydrogenase
POPTR_0007s07440	scaffold_7	5797098	5799487	F-box domain
POPTR_0007s07450	scaffold_7	5804649	5807639
POPTR_0007s07455	scaffold_7	5807819	5808294
POPTR_0007s07460	scaffold_7	5814863	5816789
POPTR_0007s07470	scaffold_7	5818304	5820251	Prefoldin subunit
POPTR_0007s07480	scaffold_7	5823272	5825393	TCP family transcription factor
POPTR_0007s07490	scaffold_7	5862120	5863202	MuDR family transposase
POPTR_0007s07500	scaffold_7	5878351	5878747
POPTR_0007s07510	scaffold_7	5884216	5885247	Zinc finger, C3HC4 type (RING finger)
POPTR_0007s07520	scaffold_7	5887819	5888942	Thioredoxin
POPTR_0007s07530	scaffold_7	5889286	5891127	Sugar (and other) transporter
POPTR_0007s07540	scaffold_7	5904725	5906533	Sugar (and other) transporter
POPTR_0007s07550	scaffold_7	5914497	5916305	Sugar (and other) transporter
POPTR_0007s07560	scaffold_7	5920871	5924303
POPTR_0007s07570	scaffold_7	5928100	5928918
POPTR_0007s07580	scaffold_7	5932820	5933791	Zinc knuckle
POPTR_0007s07590	scaffold_7	5956127	5959390
POPTR_0007s07600	scaffold_7	5964240	5968602	PHD-finger
POPTR_0007s07610	scaffold_7	5970797	5972281	PPR repeat
POPTR_0007s07620	scaffold_7	5972870	5975044	SRF-type transcription factor (DNA-binding and dimerisation domain)
POPTR_0007s07630	scaffold_7	5987788	5990600	Ribosomal protein S10p/S20e
POPTR_0007s07640	scaffold_7	5998469	6002385	Sugar (and other) transporter
POPTR_0007s07645	scaffold_7	6026003	6026233
POPTR_0007s07660	scaffold_7	6026554	6029059	Mitosis protein DIM1
POPTR_0007s07670	scaffold_7	6031382	6033905	DnaJ domain
POPTR_0007s07680	scaffold_7	6048488	6051559	Porphobilinogen deaminase, dipyromethane cofactor binding domain
POPTR_0007s07685	scaffold_7	6054610	6055993
POPTR_0007s07690	scaffold_7	6060873	6065936	Serine carboxypeptidase
POPTR_0007s07695	scaffold_7	6079903	6083059
POPTR_0007s07700	scaffold_7	6097490	6100312	Cytochrome P450
POPTR_0007s07710	scaffold_7	6100473	6105353	HD domain
POPTR_0007s07720	scaffold_7	6138005	6139059
POPTR_0007s07730	scaffold_7	6140421	6142695	Ribosomal protein L44
POPTR_0007s07740	scaffold_7	6150270	6152715	Clp protease
POPTR_0007s07750	scaffold_7	6163582	6173511	PWWP domain
POPTR_0007s07760	scaffold_7	6179418	6183090	LysM domain
POPTR_0007s07770	scaffold_7	6193416	6194357	Peptidase S24-like
POPTR_0007s07780	scaffold_7	6196136	6200312	BNR/Asp-box repeat
POPTR_0007s07790	scaffold_7	6217154	6220227	Glycosyl hydrolase family 9
POPTR_0007s07800	scaffold_7	6222389	6228080	RNA recognition motif. (a.k.a. RRM, RBD, or RNP domain)
POPTR_0007s07810	scaffold_7	6242100	6242741
POPTR_0007s07820	scaffold_7	6246848	6256296
POPTR_0007s07830	scaffold_7	6269883	6271067	Core histone H2A/H2B/H3/H4
POPTR_0007s07840	scaffold_7	6273313	6273894
POPTR_0007s07850	scaffold_7	6279702	6283878	Surp module
POPTR_0007s07860	scaffold_7	6294849	6298797	LSD1 zinc finger
POPTR_0007s07870	scaffold_7	6306580	6309786	tRNA synthetase class II core domain (G, H, P, S and T)
POPTR_0007s07880	scaffold_7	6333455	6339468
POPTR_0007s07890	scaffold_7	6361092	6364848
POPTR_0007s07900	scaffold_7	6376128	6389601	Protein kinase domain
POPTR_0007s07910	scaffold_7	6391702	6396528	DEAD/DEAH box helicase
POPTR_0007s07920	scaffold_7	6423620	6430577	ATPase family associated with various cellular activities (AAA)
POPTR_0007s07930	scaffold_7	6434018	6434859
POPTR_0007s07940	scaffold_7	6436908	6439165
POPTR_0007s07950	scaffold_7	6443104	6443436
POPTR_0007s07960	scaffold_7	6443972	6448978	Glutamine synthetase, beta-Grasp domain
POPTR_0007s07990	scaffold_7	6461826	6472141	PB1 domain
POPTR_0007s08000	scaffold_7	6483434	6486892	Putative rRNA methylase
POPTR_0007s08010	scaffold_7	6500055	6501760	Rhodanese-like domain
POPTR_0007s08020	scaffold_7	6507316	6509982	Rhodanese-like domain
POPTR_0007s08030	scaffold_7	6515768	6517048	BED zinc finger
POPTR_0007s08040	scaffold_7	6540627	6542484	mTERF
POPTR_0007s08050	scaffold_7	6551064	6551731
POPTR_0007s08060	scaffold_7	6553108	6554924	PPR repeat
POPTR_0007s08070	scaffold_7	6556466	6561870	DEAD/DEAH box helicase
POPTR_0007s08080	scaffold_7	6574062	6577293	PPR repeat
POPTR_0007s08090	scaffold_7	6581153	6583944
POPTR_0007s08100	scaffold_7	6587514	6588077
POPTR_0007s08110	scaffold_7	6588763	6590156	PPR repeat
POPTR_0007s08120	scaffold_7	6590869	6591411	Plant invertase/pectin methylesterase inhibitor
POPTR_0007s08130	scaffold_7	6598645	6599576
POPTR_0007s08140	scaffold_7	6605712	6606228
POPTR_0007s08150	scaffold_7	6610616	6611153
POPTR_0007s08160	scaffold_7	6621119	6629694	Leucine Rich Repeat
POPTR_0007s08170	scaffold_7	6704339	6704755	Auxin responsive protein
POPTR_0007s08180	scaffold_7	6727785	6735668
POPTR_0007s08190	scaffold_7	6754782	6757742	Myb-like DNA-binding domain
POPTR_0007s08200	scaffold_7	6766732	6768491	Ubiquitin-2 like Rad60 SUMO-like
POPTR_0007s08210	scaffold_7	6771266	6771715
POPTR_0007s08220	scaffold_7	6784918	6786530
POPTR_0007s08230	scaffold_7	6825295	6825745	Zinc knuckle
POPTR_0007s08240	scaffold_7	6834391	6836882	Peroxidase
POPTR_0007s08250	scaffold_7	6839762	6844203	Cyclin, N-terminal domain
POPTR_0007s08260	scaffold_7	6844780	6846042	Zinc knuckle
POPTR_0007s08270	scaffold_7	6858294	6862532
POPTR_0007s08280	scaffold_7	6875668	6877672	CCT motif
POPTR_0007s08290	scaffold_7	6906938	6908933	Protein of unknown function DUF260
POPTR_0007s08300	scaffold_7	6964939	6966227
POPTR_0007s08310	scaffold_7	6968264	6970468
POPTR_0007s08320	scaffold_7	6980550	6982010
POPTR_0007s08330	scaffold_7	6986473	6997193	MOSC N-terminal beta barrel domain
POPTR_0007s08340	scaffold_7	7034332	7036767	No apical meristem (NAM) protein
POPTR_0007s08350	scaffold_7	7098021	7099648
POPTR_0007s08360	scaffold_7	7109021	7111448	FAD binding domain
POPTR_0007s08370	scaffold_7	7137090	7137507	PPR repeat
POPTR_0007s08380	scaffold_7	7146767	7149923	Per1-like
POPTR_0007s08390	scaffold_7	7156466	7160073	Elongation factor Tu GTP binding domain
POPTR_0007s08400	scaffold_7	7197405	7201378	Elongation factor Tu GTP binding domain
POPTR_0007s08410	scaffold_7	7227536	7231936
POPTR_0007s08420	scaffold_7	7241916	7246026	No apical meristem (NAM) protein
POPTR_0007s08440	scaffold_7	7247516	7253558
POPTR_0007s08450	scaffold_7	7279836	7281197
POPTR_0007s08460	scaffold_7	7301992	7305546
POPTR_0007s08470	scaffold_7	7321212	7323863	Leucine Rich Repeat
POPTR_0007s08480	scaffold_7	7336090	7336341
POPTR_0007s08490	scaffold_7	7341971	7343933	eIF-6 family
POPTR_0007s08500	scaffold_7	7351302	7352788
POPTR_0007s08520	scaffold_7	7357567	7358892
POPTR_0007s08530	scaffold_7	7360007	7360928	Myb-like DNA-binding domain
POPTR_0007s08540	scaffold_7	7366127	7368952
POPTR_0007s08550	scaffold_7	7370656	7371466	FANCL C-terminal domain
POPTR_0007s08560	scaffold_7	7381046	7386632	Mlo family
POPTR_0007s08570	scaffold_7	7413322	7418147	Mlo family
POPTR_0007s08580	scaffold_7	7422522	7425437
POPTR_0007s08590	scaffold_7	7440403	7445120	Isocitrate/isopropylmalate dehydrogenase
POPTR_0007s08600	scaffold_7	7455084	7462301	BRCA1-associated protein 2
POPTR_0007s08610	scaffold_7	7474089	7477180
POPTR_0007s08620	scaffold_7	7497533	7498448
POPTR_0007s08630	scaffold_7	7499877	7502529	Domain of unknown function DUF221
POPTR_0007s08650	scaffold_7	7527313	7535343	La domain
POPTR_0007s08660	scaffold_7	7553730	7554295
POPTR_0007s08670	scaffold_7	7571081	7571733
POPTR_0007s08675	scaffold_7	7868393	7869925
POPTR_0007s08870	scaffold_7	7888399	7889529
POPTR_0007s08880	scaffold_7	7903843	7904723
POPTR_0007s08890	scaffold_7	7916844	7917080
POPTR_0007s08900	scaffold_7	7983490	7985498	Zinc knuckle
POPTR_0007s08910	scaffold_7	8035260	8037219	Catalase
POPTR_0007s08920	scaffold_7	8097775	8098807	Zinc finger, C2H2 type
POPTR_0007s08930	scaffold_7	8113639	8115142
POPTR_0007s08940	scaffold_7	8146284	8146694
POPTR_0007s08950	scaffold_7	8181717	8184092
POPTR_0007s09160	scaffold_7	8378797	8382999
POPTR_0007s09170	scaffold_7	8384107	8387504	Ras family
POPTR_0007s09180	scaffold_7	8446679	8448839	Rickettsia 17 kDa surface antigen
POPTR_0007s09200	scaffold_7	8512828	8513923
POPTR_0007s09210	scaffold_7	8514517	8516094
POPTR_0007s09220	scaffold_7	8535667	8540209	Protein phosphatase 2C
POPTR_0007s09230	scaffold_7	8555352	8557237
POPTR_0007s09240	scaffold_7	8567859	8568023
POPTR_0007s09260	scaffold_7	8632005	8638797	Aconitase family (aconitate hydratase)
POPTR_0007s09270	scaffold_7	8640117	8642652	2OG-Fe(II) oxygenase superfamily
POPTR_0007s09280	scaffold_7	8646694	8646858
POPTR_0007s09290	scaffold_7	8650866	8657262	ACT domain
POPTR_0007s09300	scaffold_7	8657678	8658444
POPTR_0007s09310	scaffold_7	8665872	8669281	Ankyrin repeat
POPTR_0007s09320	scaffold_7	8689734	8696267	C2 domain

## Sheet: BM-5
Gene_Name	Chromosome_Name	Gene_Start	Gene_End	PFAM_Description
POPTR_0008s05830	scaffold_8	3404565	3406879	Zinc finger, C3HC4 type (RING finger)
POPTR_0008s05840	scaffold_8	3412995	3414866	Acyltransferase
POPTR_0008s05850	scaffold_8	3428901	3436575	Nucleic acid binding protein NABP
POPTR_0008s05860	scaffold_8	3443163	3445057	Legume lectin domain
POPTR_0008s05870	scaffold_8	3449470	3452385	ATPase family associated with various cellular activities (AAA)
POPTR_0008s05880	scaffold_8	3458938	3464106	AIR synthase related protein, N-terminal domain
POPTR_0008s05890	scaffold_8	3469505	3471936	Domain of unknown function (DUF296)
POPTR_0008s05900	scaffold_8	3475569	3477914	Pentapeptide repeats (8 copies)
POPTR_0008s05910	scaffold_8	3478979	3484806	Protein of unknown function, DUF604
POPTR_0008s05930	scaffold_8	3493155	3494069	Zinc finger, C2H2 type
POPTR_0008s05940	scaffold_8	3497196	3500390	short chain dehydrogenase
POPTR_0008s05950	scaffold_8	3507908	3509993	Protein phosphatase 2C
POPTR_0008s05960	scaffold_8	3514515	3515330
POPTR_0008s05970	scaffold_8	3518302	3520693	Ribosomal protein L35Ae
POPTR_0008s05990	scaffold_8	3521545	3528262	Putative methyltransferase
POPTR_0008s06000	scaffold_8	3530251	3534995	MATH domain
POPTR_0008s06010	scaffold_8	3531549	3531998
POPTR_0008s06020	scaffold_8	3540877	3547002	Regulator of chromosome condensation (RCC1) repeat
POPTR_0008s06030	scaffold_8	3551322	3554989	Protein tyrosine kinase
POPTR_0008s06040	scaffold_8	3555799	3557951	Eukaryotic translation initiation factor 3 subunit G
POPTR_0008s06050	scaffold_8	3565766	3569445	Nucleotidyl transferase
POPTR_0008s06060	scaffold_8	3575389	3582232	Amino acid kinase family
POPTR_0008s06070	scaffold_8	3584805	3588197	Yip1 domain
POPTR_0008s06080	scaffold_8	3590890	3594893	PRA1 family protein
POPTR_0008s06090	scaffold_8	3597761	3604740
POPTR_0008s06100	scaffold_8	3606779	3612698	WD domain, G-beta repeat
POPTR_0008s06110	scaffold_8	3614071	3617436	Calcineurin-like phosphoesterase
POPTR_0008s06120	scaffold_8	3620649	3624785	Mitochondrial carrier protein
POPTR_0008s06130	scaffold_8	3626590	3630130	Associated with HOX
POPTR_0008s06140	scaffold_8	3632697	3635388	Major Facilitator Superfamily
POPTR_0008s06150	scaffold_8	3635894	3636255
POPTR_0008s06160	scaffold_8	3638987	3640631	Ras family
POPTR_0008s06170	scaffold_8	3641385	3641942	Dirigent-like protein
POPTR_0008s06180	scaffold_8	3645175	3647385
POPTR_0008s06190	scaffold_8	3652152	3652902
POPTR_0008s06200	scaffold_8	3656649	3659010
POPTR_0008s06210	scaffold_8	3659592	3660216	Protease inhibitor/seed storage/LTP family
POPTR_0008s06220	scaffold_8	3663974	3665117
POPTR_0008s06230	scaffold_8	3665576	3668882	PRONE (Plant-specific Rop nucleotide exchanger)
POPTR_0008s06240	scaffold_8	3674125	3679242	Guanylyl cyclase
POPTR_0008s06250	scaffold_8	3696922	3699437
POPTR_0008s06260	scaffold_8	3708688	3709580	Hsp20/alpha crystallin family
POPTR_0008s06270	scaffold_8	3714239	3716157
POPTR_0008s06280	scaffold_8	3719882	3722608	Protein of unknown function (DUF620)
POPTR_0008s06300	scaffold_8	3727630	3731531	Zinc finger, C3HC4 type (RING finger)
POPTR_0008s06310	scaffold_8	3734018	3734947	Myb-like DNA-binding domain
POPTR_0008s06320	scaffold_8	3737289	3737807	Myb-like DNA-binding domain
POPTR_0008s06330	scaffold_8	3747174	3747419
POPTR_0008s06340	scaffold_8	3761201	3764930	Transmembrane amino acid transporter protein
POPTR_0008s06350	scaffold_8	3765794	3767984	Yos1-like
POPTR_0008s06360	scaffold_8	3768197	3771407	SNARE-complex protein Syntaxin-18 N-terminus
POPTR_0008s06370	scaffold_8	3773475	3774862	Ribosomal protein L35Ae
POPTR_0008s06380	scaffold_8	3786539	3790259	EamA-like transporter family
POPTR_0008s06390	scaffold_8	3792661	3796488
POPTR_0008s06400	scaffold_8	3797330	3800702	LIM domain
POPTR_0008s06410	scaffold_8	3803747	3808163	Adenylosuccinate lyase C-terminal
POPTR_0008s06420	scaffold_8	3811435	3812981	Polyketide cyclase / dehydrase and lipid transport
POPTR_0008s06430	scaffold_8	3817153	3820751	Multicopper oxidase
POPTR_0008s06440	scaffold_8	3821646	3822242
POPTR_0008s06450	scaffold_8	3822382	3824044	Myb-like DNA-binding domain
POPTR_0008s06460	scaffold_8	3829002	3832661
POPTR_0008s06470	scaffold_8	3846616	3851614
POPTR_0008s06490	scaffold_8	3857007	3860674	Microsomal signal peptidase 25 kDa subunit (SPC25)
POPTR_0008s06500	scaffold_8	3862297	3866941	Mitochondrial carrier protein
POPTR_0008s06510	scaffold_8	3870542	3871778	C2 domain
POPTR_0008s06520	scaffold_8	3887595	3889149	Transferase family
POPTR_0008s06530	scaffold_8	3892589	3893182
POPTR_0008s06540	scaffold_8	3894094	3898714	Mov34/MPN/PAD-1 family
POPTR_0008s06550	scaffold_8	3900474	3905071	Mov34/MPN/PAD-1 family
POPTR_0008s06560	scaffold_8	3906783	3907418	Homeobox domain
POPTR_0008s06570	scaffold_8	3911141	3913328	Mov34/MPN/PAD-1 family
POPTR_0008s06580	scaffold_8	3917339	3918994	Major intrinsic protein
POPTR_0008s06590	scaffold_8	3927757	3932821	Glycosyl transferase family 64 domain
POPTR_0008s06600	scaffold_8	3934044	3934835
POPTR_0008s06610	scaffold_8	3941422	3943203	Hs1pro-1 N-terminus
POPTR_0008s06620	scaffold_8	3957288	3959542	Ribosomal protein L10
POPTR_0008s06630	scaffold_8	3969935	3974491	Transmembrane amino acid transporter protein
POPTR_0008s06640	scaffold_8	3978213	3983451	Peptidase family M50
POPTR_0008s06650	scaffold_8	3984233	3985096
POPTR_0008s06660	scaffold_8	3986631	3987292	PH domain
POPTR_0008s06670	scaffold_8	3992346	3995338
POPTR_0008s06680	scaffold_8	3997296	4001716
POPTR_0008s06690	scaffold_8	4007684	4011091	Arginine-tRNA-protein transferase, N terminus
POPTR_0008s06700	scaffold_8	4011308	4014705	Yippee putative zinc-binding protein
POPTR_0008s06710	scaffold_8	4012986	4013851
POPTR_0008s06720	scaffold_8	4016168	4018446	Chlorophyll A-B binding protein
POPTR_0008s06730	scaffold_8	4020947	4024140	HMG (high mobility group) box
POPTR_0008s06740	scaffold_8	4036809	4041384	Cytochrome P450
POPTR_0008s06750	scaffold_8	4043262	4047997
POPTR_0008s06760	scaffold_8	4050748	4051471
POPTR_0008s06770	scaffold_8	4063238	4064646
POPTR_0008s06780	scaffold_8	4065439	4071036	ABC1 family
POPTR_0008s06790	scaffold_8	4072727	4077310	GDSL-like Lipase/Acylhydrolase
POPTR_0008s06810	scaffold_8	4078139	4082357	GINS complex subunit Sld5
POPTR_0008s06820	scaffold_8	4088622	4089225	Protein of unknown function (DUF1313)
POPTR_0008s06830	scaffold_8	4093112	4097315	Phosphoinositide-specific phospholipase C, efhand-like
POPTR_0008s06840	scaffold_8	4099217	4103511	Phosphoinositide-specific phospholipase C, efhand-like
POPTR_0008s06850	scaffold_8	4103835	4108635	NF-X1 type zinc finger
POPTR_0008s06860	scaffold_8	4113754	4116353	Protein kinase domain
POPTR_0008s06870	scaffold_8	4121519	4126128	NLI interacting factor-like phosphatase
POPTR_0008s06880	scaffold_8	4127110	4128429
POPTR_0008s06890	scaffold_8	4127495	4133815	Protein kinase domain
POPTR_0008s06900	scaffold_8	4155750	4160703
POPTR_0008s06920	scaffold_8	4162928	4167515	Domain of unknown function (DUF3594)
POPTR_0008s06930	scaffold_8	4176536	4179510	2OG-Fe(II) oxygenase superfamily
POPTR_0008s06940	scaffold_8	4193238	4196483	Ankyrin repeat
POPTR_0008s06950	scaffold_8	4201682	4203909	N-(5'phosphoribosyl)anthranilate (PRA) isomerase
POPTR_0008s06960	scaffold_8	4205002	4207837	Domain of unknown function (DUF3474)
POPTR_0008s06970	scaffold_8	4209954	4220383	WD domain, G-beta repeat
POPTR_0008s06980	scaffold_8	4223372	4225781
POPTR_0008s06990	scaffold_8	4229924	4233815	Arabidopsis proteins of unknown function
POPTR_0008s07000	scaffold_8	4238006	4240293	Arabidopsis proteins of unknown function
POPTR_0008s07010	scaffold_8	4240887	4242637	Arabidopsis proteins of unknown function
POPTR_0008s07020	scaffold_8	4245288	4250067	Arabidopsis proteins of unknown function
POPTR_0008s07040	scaffold_8	4251414	4271774	Proteasome/cyclosome repeat
POPTR_0008s07050	scaffold_8	4276320	4278218	Protein phosphatase 2C
POPTR_0008s07060	scaffold_8	4280914	4281546
POPTR_0008s07070	scaffold_8	4283120	4294482	Clathrin propeller repeat
POPTR_0008s07080	scaffold_8	4298334	4300695
POPTR_0008s07090	scaffold_8	4302175	4303463	Helix-loop-helix DNA-binding domain
POPTR_0008s07100	scaffold_8	4306382	4307161	Myb-like DNA-binding domain
POPTR_0008s07110	scaffold_8	4310440	4310934	Zinc finger, C3HC4 type (RING finger)
POPTR_0008s07120	scaffold_8	4315368	4316418	AP2 domain
POPTR_0008s07130	scaffold_8	4328251	4329558	Transferase family
POPTR_0008s07140	scaffold_8	4336361	4337391	Alcohol dehydrogenase transcription factor Myb/SANT-like
POPTR_0008s07150	scaffold_8	4340915	4341459	Protein of unknown function DUF260
POPTR_0008s07160	scaffold_8	4348042	4350097	Zinc-finger of the MIZ type in Nse subunit
POPTR_0008s07170	scaffold_8	4357096	4358809	Myb-like DNA-binding domain
POPTR_0008s07180	scaffold_8	4366709	4371434	Surface antigen variable number repeat
POPTR_0008s07190	scaffold_8	4373758	4376704	Mad3/BUB1 homology region 1
POPTR_0008s07200	scaffold_8	4377021	4377856	Pollen proteins Ole e I like
POPTR_0008s07210	scaffold_8	4379458	4383982	Leucine rich repeat N-terminal domain
POPTR_0008s07220	scaffold_8	4396620	4397841	Glutaredoxin
POPTR_0008s07230	scaffold_8	4401521	4407986	N terminus of Rad21 / Rec8 like protein
POPTR_0008s07240	scaffold_8	4411510	4413294	Peptide N-acetyl-beta-D-glucosaminyl asparaginase amidase A
POPTR_0008s07250	scaffold_8	4415942	4419218	S1 RNA binding domain
POPTR_0008s07260	scaffold_8	4422312	4427995	Histidine acid phosphatase
POPTR_0008s07270	scaffold_8	4430878	4433972	Ferritin-like domain
POPTR_0008s07280	scaffold_8	4447965	4449268	Protein of unknown function DUF260
POPTR_0008s07290	scaffold_8	4454936	4455501
POPTR_0008s07300	scaffold_8	4460852	4464815	Glycosyl hydrolase family 85
POPTR_0008s07310	scaffold_8	4467218	4471821	DEAD/DEAH box helicase
POPTR_0008s07320	scaffold_8	4475043	4481481
POPTR_0008s07330	scaffold_8	4485234	4487748	Arabidopsis proteins of unknown function
POPTR_0008s07340	scaffold_8	4494607	4495302	Polyketide cyclase / dehydrase and lipid transport
POPTR_0008s07350	scaffold_8	4504979	4510269	Helicase conserved C-terminal domain
POPTR_0008s07360	scaffold_8	4514200	4516124	AP2 domain
POPTR_0008s07370	scaffold_8	4520924	4523873	Multicopper oxidase
POPTR_0008s07380	scaffold_8	4527635	4530760	Multicopper oxidase
POPTR_0008s07390	scaffold_8	4536603	4537604
POPTR_0008s07400	scaffold_8	4539333	4540609	PRA1 family protein
POPTR_0008s07410	scaffold_8	4543781	4548696	Biotin-requiring enzyme
POPTR_0008s07420	scaffold_8	4548889	4552995	Development and cell death domain
POPTR_0008s07430	scaffold_8	4564001	4568756	Protein of unknown function, DUF399
POPTR_0008s07440	scaffold_8	4570183	4572195
POPTR_0008s07450	scaffold_8	4574851	4575794	Ataxin-2 C-terminal region
POPTR_0008s07460	scaffold_8	4576619	4577128
POPTR_0008s07470	scaffold_8	4581970	4584539	Staphylococcal nuclease homologue
POPTR_0008s07480	scaffold_8	4584270	4584905
POPTR_0008s07490	scaffold_8	4584685	4588416	Sel1 repeat
POPTR_0008s07500	scaffold_8	4590527	4591487	Protein of unknown function (DUF567)
POPTR_0008s07510	scaffold_8	4598534	4599330	Wound-induced protein WI12
POPTR_0008s07520	scaffold_8	4607659	4609316	Protein of unknown function (DUF2985)
POPTR_0008s07530	scaffold_8	4610229	4614187	Aromatic-di-Alanine (AdAR) repeat
POPTR_0008s07540	scaffold_8	4615819	4616659
POPTR_0008s07550	scaffold_8	4617145	4619667
POPTR_0008s07560	scaffold_8	4620206	4623836	Nop53 (60S ribosomal biogenesis)
POPTR_0008s07570	scaffold_8	4624834	4630413	PCRF domain
POPTR_0008s07580	scaffold_8	4632240	4643300	Type III restriction enzyme, res subunit
POPTR_0008s07590	scaffold_8	4646909	4648799	Ribosomal L38e protein family
POPTR_0008s07600	scaffold_8	4652439	4657809
POPTR_0008s07610	scaffold_8	4670468	4674483	AP2 domain
POPTR_0008s07620	scaffold_8	4676012	4677140	Domain of unknown function(DUF1950)
POPTR_0008s07630	scaffold_8	4678201	4679676	GDSL-like Lipase/Acylhydrolase
POPTR_0008s07640	scaffold_8	4681655	4683800	GDSL-like Lipase/Acylhydrolase
POPTR_0008s07650	scaffold_8	4687212	4689518	FAR1 DNA-binding domain
POPTR_0008s07660	scaffold_8	4691419	4693327	Protein of unknown function (DUF565)
POPTR_0008s07670	scaffold_8	4695670	4699286	Calcineurin-like phosphoesterase
POPTR_0008s07680	scaffold_8	4700293	4708549	IBR domain
POPTR_0008s07690	scaffold_8	4704168	4704448
POPTR_0008s07700	scaffold_8	4712100	4720798	Nucleotide-sugar transporter
POPTR_0008s07710	scaffold_8	4723915	4727857	haloacid dehalogenase-like hydrolase
POPTR_0008s07720	scaffold_8	4728684	4729172
POPTR_0008s07730	scaffold_8	4742422	4745625	Phosphatidylethanolamine-binding protein
POPTR_0008s07740	scaffold_8	4747053	4753353	Chromatin assembly factor 1 subunit A
POPTR_0008s07750	scaffold_8	4758620	4760626	Fatty acid desaturase
POPTR_0008s07760	scaffold_8	4761227	4762109
POPTR_0008s07770	scaffold_8	4765927	4774345	RNA recognition motif. (a.k.a. RRM, RBD, or RNP domain)
POPTR_0008s07780	scaffold_8	4777328	4779028	LSM domain
POPTR_0008s07790	scaffold_8	4779871	4791422	N terminus of Rad21 / Rec8 like protein
POPTR_0008s07800	scaffold_8	4802594	4809212	LETM1-like protein
POPTR_0008s07810	scaffold_8	4809509	4809791
POPTR_0008s07820	scaffold_8	4810834	4818314	ACT domain
POPTR_0008s07830	scaffold_8	4820615	4823223	Leucine rich repeat N-terminal domain
POPTR_0008s07840	scaffold_8	4829007	4830127
POPTR_0008s07850	scaffold_8	4830679	4831185	EF hand
POPTR_0008s07860	scaffold_8	4833262	4833861	EF hand
POPTR_0008s07870	scaffold_8	4833881	4843182	WD domain, G-beta repeat
POPTR_0008s07890	scaffold_8	4850804	4858393	Glycosyl hydrolase family 20, domain 2
POPTR_0008s07900	scaffold_8	4859216	4863163	Glycosyl hydrolase family 9
POPTR_0008s07910	scaffold_8	4869886	4870691
POPTR_0008s07920	scaffold_8	4873895	4880868	Vps51/Vps67
POPTR_0008s07930	scaffold_8	4888701	4890806	Protein of unknown function DUF260
POPTR_0008s07940	scaffold_8	4894724	4900664	Trypsin
POPTR_0008s07950	scaffold_8	4908318	4910766	No apical meristem (NAM) protein
POPTR_0008s07970	scaffold_8	4912165	4918679	CTP synthase N-terminus
POPTR_0008s07960	scaffold_8	4912165	4913058
POPTR_0008s07980	scaffold_8	4924692	4930532	Zinc finger C-x8-C-x5-C-x3-H type (and similar)
POPTR_0008s07990	scaffold_8	4933030	4934233
POPTR_0008s08000	scaffold_8	4936996	4940894	Isocitrate/isopropylmalate dehydrogenase
POPTR_0008s08010	scaffold_8	4944254	4946431	Protein kinase domain
POPTR_0008s08020	scaffold_8	4950551	4951600	Surfeit locus protein 5 subunit 22 of Mediator complex
POPTR_0008s08030	scaffold_8	4958616	4962815	YT521-B-like family
POPTR_0008s08040	scaffold_8	4963442	4985852	M protein repeat
POPTR_0008s08050	scaffold_8	4988078	4990754	Methyladenine glycosylase
POPTR_0008s08060	scaffold_8	5004500	5007263	Caspase domain
POPTR_0008s08070	scaffold_8	5007880	5025131	LSD1 zinc finger
POPTR_0008s08080	scaffold_8	5032481	5035554	Copine
POPTR_0008s08090	scaffold_8	5036108	5037628
POPTR_0008s08100	scaffold_8	5042587	5045443	No apical meristem (NAM) protein
POPTR_0008s08110	scaffold_8	5048208	5049513	Myb-like DNA-binding domain
POPTR_0008s08120	scaffold_8	5056045	5059279	Protein of unknown function (DUF620)
POPTR_0008s08130	scaffold_8	5064861	5067010	Myb-like DNA-binding domain
POPTR_0008s08140	scaffold_8	5072361	5074057
POPTR_0008s08150	scaffold_8	5077502	5077678
POPTR_0008s08160	scaffold_8	5081675	5086056	LEM3 (ligand-effect modulator 3) family / CDC50 family
POPTR_0008s08170	scaffold_8	5086530	5089222
POPTR_0008s08180	scaffold_8	5091974	5093496
POPTR_0008s08190	scaffold_8	5099196	5102308	Terpene synthase, N-terminal domain
POPTR_0008s08200	scaffold_8	5102909	5105408	IMP dehydrogenase / GMP reductase domain
POPTR_0008s08210	scaffold_8	5109233	5109892
POPTR_0008s08220	scaffold_8	5113901	5118615	Terpene synthase, N-terminal domain
POPTR_0008s08230	scaffold_8	5118939	5122665	IMP dehydrogenase / GMP reductase domain
POPTR_0008s08240	scaffold_8	5126507	5128614	X8 domain
POPTR_0008s08250	scaffold_8	5130992	5132478	PPR repeat
POPTR_0008s08260	scaffold_8	5135356	5136981	ZIP Zinc transporter
POPTR_0008s08270	scaffold_8	5143888	5149941	Cyclin, N-terminal domain
POPTR_0008s08280	scaffold_8	5151594	5155602
POPTR_0008s08290	scaffold_8	5159633	5160722	Uncharacterized conserved protein (DUF2358)
POPTR_0008s08300	scaffold_8	5160757	5161525
POPTR_0008s08310	scaffold_8	5164567	5166771	Cation efflux family
POPTR_0008s08330	scaffold_8	5167982	5176463	Domain of unknown function (DUF298)
POPTR_0008s08340	scaffold_8	5176831	5182249	Glyceraldehyde 3-phosphate dehydrogenase, NAD binding domain
POPTR_0008s08350	scaffold_8	5187876	5188536
POPTR_0008s08370	scaffold_8	5191840	5198971
POPTR_0008s08380	scaffold_8	5200098	5201015
POPTR_0008s08390	scaffold_8	5205093	5205707	Cupin
POPTR_0008s08400	scaffold_8	5206871	5210631	Phosphoglycerate kinase
POPTR_0008s08410	scaffold_8	5211763	5215416	Phosphoglycerate kinase
POPTR_0008s08420	scaffold_8	5216588	5218248
POPTR_0008s08430	scaffold_8	5218879	5223585	DEAD/DEAH box helicase
POPTR_0008s08440	scaffold_8	5233914	5237680	FAD binding domain
POPTR_0008s08450	scaffold_8	5239760	5240939
POPTR_0008s08460	scaffold_8	5241771	5247860	C2 domain
POPTR_0008s08470	scaffold_8	5252010	5255741	FF domain
POPTR_0008s08475	scaffold_8	5256102	5257207
POPTR_0008s08480	scaffold_8	5257348	5262597
POPTR_0008s08490	scaffold_8	5267156	5270883	RNA recognition motif. (a.k.a. RRM, RBD, or RNP domain)
POPTR_0008s08500	scaffold_8	5272199	5273590	NPH3 family
POPTR_0008s08510	scaffold_8	5275573	5276235
POPTR_0008s08520	scaffold_8	5278971	5280345
POPTR_0008s08530	scaffold_8	5281192	5287910
POPTR_0008s08540	scaffold_8	5297533	5305030	Importin-beta N-terminal domain
POPTR_0008s08550	scaffold_8	5306604	5307073
POPTR_0008s08560	scaffold_8	5309627	5310812	ZF-HD protein dimerisation region
POPTR_0008s08570	scaffold_8	5317201	5317775
POPTR_0008s08580	scaffold_8	5317866	5318850
POPTR_0008s08590	scaffold_8	5322530	5326195	Zinc finger, C3HC4 type (RING finger)
POPTR_0008s08600	scaffold_8	5331169	5335258	GDA1/CD39 (nucleoside phosphatase) family
POPTR_0008s08610	scaffold_8	5339959	5341868	Transmembrane amino acid transporter protein
POPTR_0008s08620	scaffold_8	5343675	5344914
POPTR_0008s08640	scaffold_8	5347034	5350408	Ribonuclease T2 family
POPTR_0008s08650	scaffold_8	5356509	5358814	Ribonuclease T2 family
POPTR_0008s08660	scaffold_8	5362312	5365800	Galactoside-binding lectin
POPTR_0008s08670	scaffold_8	5366291	5367153	Protein of unknown function (DUF679)
POPTR_0008s08680	scaffold_8	5367619	5369695
POPTR_0008s08690	scaffold_8	5369976	5371011	Zinc finger, C3HC4 type (RING finger)
POPTR_0008s08700	scaffold_8	5371117	5372194
POPTR_0008s08710	scaffold_8	5371756	5374232	GMC oxidoreductase
POPTR_0008s08720	scaffold_8	5378328	5380369	Myb-like DNA-binding domain
POPTR_0008s08730	scaffold_8	5386231	5387238
POPTR_0008s08740	scaffold_8	5397461	5400474	Dof domain, zinc finger
POPTR_0008s08750	scaffold_8	5407562	5408071	EF hand
POPTR_0008s08760	scaffold_8	5410632	5412444	Myb-like DNA-binding domain
POPTR_0008s08770	scaffold_8	5428857	5429240
POPTR_0008s08780	scaffold_8	5431595	5435799	SRF-type transcription factor (DNA-binding and dimerisation domain)
POPTR_0008s08790	scaffold_8	5445836	5447940	Rare lipoprotein A (RlpA)-like double-psi beta-barrel
POPTR_0008s08800	scaffold_8	5462413	5464938	Methyltransferase domain
POPTR_0008s08810	scaffold_8	5466863	5470573	KH domain
POPTR_0008s08820	scaffold_8	5478886	5479631	Domain of unknown function (DUF588)
POPTR_0008s08830	scaffold_8	5481690	5484386	Protein of unknown function (DUF962)
POPTR_0008s08840	scaffold_8	5484919	5487156	Cytochrome P450
POPTR_0008s08850	scaffold_8	5487903	5489674	No apical meristem (NAM) protein
POPTR_0008s08860	scaffold_8	5497575	5498902
POPTR_0008s08870	scaffold_8	5504864	5506533	Myb-like DNA-binding domain
POPTR_0008s08880	scaffold_8	5510450	5512521
POPTR_0008s08890	scaffold_8	5512774	5513572	EF hand
POPTR_0008s08900	scaffold_8	5514014	5515774	Tetratricopeptide repeat
POPTR_0008s08910	scaffold_8	5517296	5524269	Cullin family
POPTR_0008s08920	scaffold_8	5535918	5537753	Myb-like DNA-binding domain
POPTR_0008s08930	scaffold_8	5546080	5547785
POPTR_0008s08940	scaffold_8	5550570	5553434	PPIC-type PPIASE domain
POPTR_0008s08950	scaffold_8	5553376	5556303	Xyloglucan fucosyltransferase
POPTR_0008s08960	scaffold_8	5558308	5560680	Ribosomal L32p protein family
POPTR_0008s08965	scaffold_8	5562021	5562221
POPTR_0008s08970	scaffold_8	5564898	5565221
POPTR_0008s08980	scaffold_8	5566823	5572452	SPX domain
POPTR_0008s08990	scaffold_8	5573494	5577116	SPX domain
POPTR_0008s09000	scaffold_8	5579955	5583813	SET domain
POPTR_0008s09010	scaffold_8	5583016	5588523	GDP-fucose protein O-fucosyltransferase
POPTR_0008s09020	scaffold_8	5594668	5597107	emp24/gp25L/p24 family/GOLD
POPTR_0008s09030	scaffold_8	5599713	5605310	Ankyrin repeat
POPTR_0008s09040	scaffold_8	5606469	5609122
POPTR_0008s09050	scaffold_8	5610455	5612720	Vesicle transport v-SNARE protein N-terminus
POPTR_0008s09060	scaffold_8	5614429	5615563	PCI domain
POPTR_0008s09070	scaffold_8	5619025	5627793	Domain of unknown function DUF221
POPTR_0008s09080	scaffold_8	5630740	5631915	AP2 domain
POPTR_0008s09090	scaffold_8	5634735	5638131	Prefoldin subunit
POPTR_0008s09100	scaffold_8	5640700	5641925
POPTR_0008s09110	scaffold_8	5644469	5646011
POPTR_0008s09120	scaffold_8	5647605	5653313	DHHC zinc finger domain
POPTR_0008s09130	scaffold_8	5663013	5664241
POPTR_0008s09140	scaffold_8	5664932	5668102	WRKY DNA -binding domain
POPTR_0008s09150	scaffold_8	5672587	5674663	Eukaryotic elongation factor 5A hypusine, DNA-binding OB fold
POPTR_0008s09160	scaffold_8	5677215	5681886	WD domain, G-beta repeat
POPTR_0008s09170	scaffold_8	5682390	5682710
POPTR_0008s09180	scaffold_8	5683301	5685620	Septum formation topological specificity factor MinE
POPTR_0008s09190	scaffold_8	5686521	5690517	Uncharacterised ACR, YagE family COG1723
POPTR_0008s09200	scaffold_8	5691159	5694206	Protein of unknown function, DUF538
POPTR_0008s09210	scaffold_8	5694487	5696822
POPTR_0008s09220	scaffold_8	5698658	5701837	Protein of unknown function (DUF563)
POPTR_0008s09230	scaffold_8	5722065	5726067	Plant protein of unknown function (DUF863)
POPTR_0008s09240	scaffold_8	5729865	5731571	PPR repeat
POPTR_0008s09250	scaffold_8	5731692	5731910
POPTR_0008s09260	scaffold_8	5732819	5735056	PPR repeat
POPTR_0008s09270	scaffold_8	5738815	5745748	Macro domain
POPTR_0008s09280	scaffold_8	5748584	5749077
POPTR_0008s09290	scaffold_8	5751232	5753162	Remorin, C-terminal region
POPTR_0008s09300	scaffold_8	5755509	5758405	Leucine rich repeat N-terminal domain
POPTR_0008s09310	scaffold_8	5762510	5762827
POPTR_0008s09320	scaffold_8	5767016	5768548
POPTR_0008s09330	scaffold_8	5770802	5774013	SNARE domain
POPTR_0008s09340	scaffold_8	5774308	5774517
POPTR_0008s09350	scaffold_8	5775382	5777366
POPTR_0008s09360	scaffold_8	5789519	5793094	WRKY DNA -binding domain
POPTR_0008s09370	scaffold_8	5797998	5801697	CobW/HypB/UreG, nucleotide-binding domain
POPTR_0008s09380	scaffold_8	5806199	5812606	Glycosyl hydrolase family 1
POPTR_0008s09390	scaffold_8	5815409	5818227	UDP-glucose/GDP-mannose dehydrogenase family, NAD binding domain
POPTR_0008s09400	scaffold_8	5820149	5823252	Myb-like DNA-binding domain
POPTR_0008s09410	scaffold_8	5828107	5829858	Zinc finger, C2H2 type
POPTR_0008s09420	scaffold_8	5833856	5836349	Chromatin associated protein KTI12
POPTR_0008s09430	scaffold_8	5840796	5844042	Tetratricopeptide repeat
POPTR_0008s09440	scaffold_8	5844599	5850355	Methyltransferase domain
POPTR_0008s09450	scaffold_8	5853243	5855850	14-3-3 protein
POPTR_0008s09460	scaffold_8	5857983	5859814	CT20 family
POPTR_0008s09470	scaffold_8	5861179	5866007	EamA-like transporter family
POPTR_0008s09480	scaffold_8	5875115	5877531	X8 domain
POPTR_0008s09490	scaffold_8	5880894	5882352
POPTR_0008s09500	scaffold_8	5883501	5886700	Fatty acid elongase 3-ketoacyl-CoA synthase 1
POPTR_0008s09510	scaffold_8	5887157	5890052	Fatty acid elongase 3-ketoacyl-CoA synthase 1
POPTR_0008s09520	scaffold_8	5890920	5896486	Protein of unknown function, DUF647
POPTR_0008s09530	scaffold_8	5899366	5901330	PPR repeat
POPTR_0008s09540	scaffold_8	5902594	5903595
POPTR_0008s09550	scaffold_8	5906307	5911334	Calcineurin-like phosphoesterase
POPTR_0008s09560	scaffold_8	5912108	5914321
POPTR_0008s09570	scaffold_8	5914531	5918298
POPTR_0008s09580	scaffold_8	5922361	5924014
POPTR_0008s09590	scaffold_8	5927991	5931952	Leucine rich repeat N-terminal domain
POPTR_0008s09620	scaffold_8	5931979	5936867	Protein of unknown function (DUF1675)
POPTR_0008s09610	scaffold_8	5934484	5935389
POPTR_0008s09630	scaffold_8	5945452	5950023	Nuclear transport factor 2 (NTF2) domain
POPTR_0008s09640	scaffold_8	5953792	5960533	Helicase conserved C-terminal domain
POPTR_0008s09650	scaffold_8	5961424	5964770	alpha/beta hydrolase fold
POPTR_0008s09660	scaffold_8	5965749	5968950
POPTR_0008s09670	scaffold_8	5969440	5971099	Coenzyme Q (ubiquinone) biosynthesis protein Coq4
POPTR_0008s09680	scaffold_8	5982917	5987415
POPTR_0008s09690	scaffold_8	5988907	5992737	pfkB family carbohydrate kinase
POPTR_0008s09700	scaffold_8	5993034	5995166	7,8-dihydro-6-hydroxymethylpterin-pyrophosphokinase (HPPK)
POPTR_0008s09710	scaffold_8	5995840	5997406	RNA recognition motif. (a.k.a. RRM, RBD, or RNP domain)
POPTR_0008s09720	scaffold_8	6000466	6003770	Reversibly glycosylated polypeptide
POPTR_0008s09730	scaffold_8	6005463	6013467	F/Y-rich N-terminus
POPTR_0008s09740	scaffold_8	6021015	6022693	YABBY protein
POPTR_0008s09750	scaffold_8	6025419	6029702	SBP domain
POPTR_0008s09760	scaffold_8	6041961	6042603
POPTR_0008s09770	scaffold_8	6050402	6051459
POPTR_0008s09790	scaffold_8	6063858	6070604	SRF-type transcription factor (DNA-binding and dimerisation domain)
POPTR_0008s09800	scaffold_8	6073641	6078620	SRF-type transcription factor (DNA-binding and dimerisation domain)
POPTR_0008s09810	scaffold_8	6083701	6090984	SBP domain
POPTR_0008s09820	scaffold_8	6091531	6093702	PPR repeat
POPTR_0008s09830	scaffold_8	6095094	6104164	ABC transporter
POPTR_0008s09840	scaffold_8	6106706	6115499	ABC transporter
POPTR_0008s09850	scaffold_8	6121391	6123104	Cytochrome P450
POPTR_0008s09860	scaffold_8	6125000	6127431
POPTR_0008s09870	scaffold_8	6128680	6130809	S-adenosylmethionine synthetase, N-terminal domain
POPTR_0008s09880	scaffold_8	6135800	6137658	Microtubule associated protein 1A/1B, light chain 3
POPTR_0008s09890	scaffold_8	6138219	6138572
POPTR_0008s09900	scaffold_8	6139062	6142038	MATH domain
POPTR_0008s09910	scaffold_8	6142858	6144897
POPTR_0008s09920	scaffold_8	6148505	6149704
POPTR_0008s09930	scaffold_8	6151037	6152438	Redoxin
POPTR_0008s09940	scaffold_8	6155149	6157381	ADP-ribosylation factor family
POPTR_0008s09950	scaffold_8	6157973	6161762	Mitochondrial carrier protein
POPTR_0008s09960	scaffold_8	6165862	6170987	YT521-B-like family
POPTR_0008s09970	scaffold_8	6176220	6180339
POPTR_0008s09980	scaffold_8	6180344	6184442	Complex 1 protein (LYR family)
POPTR_0008s09990	scaffold_8	6184989	6187827	Glycosyl hydrolases family 28
POPTR_0008s10000	scaffold_8	6205928	6239544	PH domain
POPTR_0008s10010	scaffold_8	6241635	6244056	Protein phosphatase 2C
POPTR_0008s10020	scaffold_8	6245427	6248009	Pyridine nucleotide-disulphide oxidoreductase
POPTR_0008s10030	scaffold_8	6250402	6251364
POPTR_0008s10040	scaffold_8	6253952	6255729	Glycosyl transferase family 8
POPTR_0008s10050	scaffold_8	6264946	6268162	S1 RNA binding domain
POPTR_0008s10060	scaffold_8	6268273	6275061	Domain of unknown function (DUF814)
POPTR_0008s10070	scaffold_8	6276184	6290951	IQ calmodulin-binding motif
POPTR_0008s10080	scaffold_8	6310729	6312668	Myb-like DNA-binding domain
POPTR_0008s10090	scaffold_8	6323655	6327829	Plant neutral invertase
POPTR_0008s10100	scaffold_8	6328367	6332316	2OG-Fe(II) oxygenase superfamily
POPTR_0008s10120	scaffold_8	6353398	6354444
POPTR_0008s10130	scaffold_8	6362869	6363414
POPTR_0008s10140	scaffold_8	6364040	6367974	DnaJ domain
POPTR_0008s10150	scaffold_8	6369120	6371951	Ribosomal protein S6
POPTR_0008s10160	scaffold_8	6375569	6376731
POPTR_0008s10170	scaffold_8	6379012	6379684	PPR repeat
POPTR_0008s10180	scaffold_8	6380274	6383193	Rab5-interacting protein (Rab5ip)
POPTR_0008s10190	scaffold_8	6383853	6388790	Cas1p-like protein
POPTR_0008s10200	scaffold_8	6392729	6393021
POPTR_0008s10210	scaffold_8	6393509	6397444	Poly(A) polymerase central domain
POPTR_0008s10220	scaffold_8	6401654	6402520	Plant invertase/pectin methylesterase inhibitor
POPTR_0008s10230	scaffold_8	6406467	6409367
POPTR_0008s10240	scaffold_8	6412710	6418570	Galactokinase galactose-binding signature
POPTR_0008s10250	scaffold_8	6421060	6423082	Cupin
POPTR_0008s10260	scaffold_8	6424173	6428019	Conserved hypothetical ATP binding protein
POPTR_0008s10270	scaffold_8	6430016	6431268	Peroxidase
POPTR_0008s10280	scaffold_8	6435084	6436968	WRKY DNA -binding domain
POPTR_0008s10300	scaffold_8	6448229	6452839	Prefoldin subunit
POPTR_0008s10310	scaffold_8	6463840	6465500
POPTR_0008s10320	scaffold_8	6473436	6474922
POPTR_0008s10340	scaffold_8	6479560	6480362
POPTR_0008s10350	scaffold_8	6485365	6488740	GINS complex subunit Sld5
POPTR_0008s10360	scaffold_8	6489679	6490200	EF hand
POPTR_0008s10370	scaffold_8	6496970	6497562
POPTR_0008s10380	scaffold_8	6497829	6500725
POPTR_0008s10390	scaffold_8	6501193	6505568	Protein phosphatase 2C
POPTR_0008s10400	scaffold_8	6514226	6515669	Ubiquitin-conjugating enzyme
POPTR_0008s10410	scaffold_8	6519204	6520803	Enoyl-CoA hydratase/isomerase family
POPTR_0008s10420	scaffold_8	6524719	6526402	GDSL-like Lipase/Acylhydrolase
POPTR_0008s10430	scaffold_8	6529105	6530782	GDSL-like Lipase/Acylhydrolase
POPTR_0008s10440	scaffold_8	6532412	6533884	Pectinesterase
POPTR_0008s10450	scaffold_8	6540650	6542470
POPTR_0008s10460	scaffold_8	6543783	6550386	PAS fold
POPTR_0008s10470	scaffold_8	6554308	6562537	PAS fold
POPTR_0008s10480	scaffold_8	6566362	6572173	CoA-ligase
POPTR_0008s10490	scaffold_8	6578511	6580667
POPTR_0008s10500	scaffold_8	6582795	6585359	Di-glucose binding within endoplasmic reticulum
POPTR_0008s10510	scaffold_8	6586214	6587011
POPTR_0008s10520	scaffold_8	6593558	6597141	Domain of unknown function DUF143

## Sheet: BM-6
Gene_Name	Chromosome_Name	Gene_Start	Gene_End	PFAM_Description
POPTR_0013s01100	scaffold_13	602083	606059	His Kinase A (phosphoacceptor) domain
POPTR_0013s01110	scaffold_13	607450	609082	Universal stress protein family
POPTR_0013s01120	scaffold_13	613730	615822	ADP-ribosylation factor family
POPTR_0013s01130	scaffold_13	616538	619423	ADP-ribosylation factor family
POPTR_0013s01140	scaffold_13	621387	621610
POPTR_0013s01150	scaffold_13	622696	622896
POPTR_0013s01160	scaffold_13	625044	628671	U1 zinc finger
POPTR_0013s01170	scaffold_13	632782	634097	Protein of unknown function (DUF1645)
POPTR_0013s01180	scaffold_13	641217	646596
POPTR_0013s01190	scaffold_13	648678	649301	Domain of unknown function (DUF3511)
POPTR_0013s01200	scaffold_13	654845	658642	Calmodulin binding protein-like
POPTR_0013s01210	scaffold_13	662523	665136	DnaJ domain
POPTR_0013s01220	scaffold_13	668706	673243	Importin beta binding domain
POPTR_0013s01230	scaffold_13	675882	678248	RS4NT (NUC023) domain
POPTR_0013s01240	scaffold_13	681867	685289	Syntaxin
POPTR_0013s01250	scaffold_13	687220	691745	Drought induced 19 protein (Di19)
POPTR_0013s01260	scaffold_13	692695	694017
POPTR_0013s01270	scaffold_13	694361	698086	P-11 zinc finger
POPTR_0013s01280	scaffold_13	715052	722276	Calponin homology (CH) domain
POPTR_0013s01290	scaffold_13	722393	723044
POPTR_0013s01300	scaffold_13	725164	728774	Protein phosphatase 2C
POPTR_0013s01310	scaffold_13	730897	731756
POPTR_0013s01320	scaffold_13	734890	737502	Single-strand binding protein family
POPTR_0013s01330	scaffold_13	739914	746691	PCI domain
POPTR_0013s01340	scaffold_13	748607	749689
POPTR_0013s01350	scaffold_13	749789	753541	PRP38 family
POPTR_0013s01360	scaffold_13	755461	765178	LisH
POPTR_0013s01370	scaffold_13	785181	788740	Protein phosphatase 2C
POPTR_0013s01380	scaffold_13	789754	795784	Phospholipase D Active site motif
POPTR_0013s01390	scaffold_13	797435	801181	Tetratricopeptide repeat
POPTR_0013s01400	scaffold_13	801654	805244	Prenyltransferase and squalene oxidase repeat
POPTR_0013s01410	scaffold_13	810529	811975	F-box domain
POPTR_0013s01420	scaffold_13	814333	815109
POPTR_0013s01430	scaffold_13	822721	823636	Plant invertase/pectin methylesterase inhibitor
POPTR_0013s01440	scaffold_13	824354	824989
POPTR_0013s01450	scaffold_13	827911	832315	Protein of unknown function (DUF1399)
POPTR_0013s01460	scaffold_13	836721	840669	Leucine Rich Repeat
POPTR_0013s01470	scaffold_13	842677	844391	Plant invertase/pectin methylesterase inhibitor
POPTR_0013s01480	scaffold_13	844781	847040	Plant invertase/pectin methylesterase inhibitor
POPTR_0013s01490	scaffold_13	845695	846276
POPTR_0013s01500	scaffold_13	848243	850396	Plant invertase/pectin methylesterase inhibitor
POPTR_0013s01510	scaffold_13	858205	859701	alpha/beta hydrolase fold
POPTR_0013s01520	scaffold_13	860580	862751	Ribosomal protein L18e/L15
POPTR_0013s01530	scaffold_13	865471	868127	PUA domain
POPTR_0013s01540	scaffold_13	871505	874778	MtN3/saliva family
POPTR_0013s01550	scaffold_13	881761	884015	MtN3/saliva family
POPTR_0013s01560	scaffold_13	888739	892603	Plant mobile domain
POPTR_0013s01570	scaffold_13	895032	896043	Fasciclin domain
POPTR_0013s01580	scaffold_13	897106	898004
POPTR_0013s01590	scaffold_13	901863	903760	MtN3/saliva family
POPTR_0013s01600	scaffold_13	906670	908429	MtN3/saliva family
POPTR_0013s01610	scaffold_13	910698	911393	Protein of unknown function, DUF538
POPTR_0013s01620	scaffold_13	915979	919384	Calcineurin-like phosphoesterase
POPTR_0013s01630	scaffold_13	921312	923914	Folate receptor family
POPTR_0013s01640	scaffold_13	927595	930622	Dormancy/auxin associated protein
POPTR_0013s01650	scaffold_13	935626	938576	Transcription factor S-II (TFIIS)
POPTR_0013s01660	scaffold_13	940334	941707	FAE1/Type III polyketide synthase-like protein
POPTR_0013s01670	scaffold_13	948169	950011	GDSL-like Lipase/Acylhydrolase
POPTR_0013s01680	scaffold_13	951184	952971	Ribosomal L22e protein family
POPTR_0013s01690	scaffold_13	954617	956557	Hypoxia induced protein conserved region
POPTR_0013s01700	scaffold_13	960082	965769	RNA recognition motif. (a.k.a. RRM, RBD, or RNP domain)
POPTR_0013s01710	scaffold_13	966786	973792	Zinc finger, C3HC4 type (RING finger)
POPTR_0013s01720	scaffold_13	977957	980213	hAT family dimerisation domain
POPTR_0013s01730	scaffold_13	983096	986429
POPTR_0013s01740	scaffold_13	991233	994082	NB-ARC domain
POPTR_0013s01750	scaffold_13	995770	999473	AAA domain (dynein-related subfamily)
POPTR_0013s01760	scaffold_13	1000751	1005427
POPTR_0013s01770	scaffold_13	1008993	1013476	F-actin capping protein alpha subunit
POPTR_0013s01780	scaffold_13	1014821	1018452
POPTR_0013s01790	scaffold_13	1019031	1023127	Clp protease
POPTR_0013s01800	scaffold_13	1029273	1031367	Rubber elongation factor protein (REF)
POPTR_0013s01810	scaffold_13	1038177	1039032	Rapid ALkalinization Factor (RALF)
POPTR_0013s01820	scaffold_13	1045466	1050035	Rad9
POPTR_0013s01830	scaffold_13	1051822	1054311	Ribosomal protein S21e
POPTR_0013s01840	scaffold_13	1064915	1066808	Heavy-metal-associated domain
POPTR_0013s01850	scaffold_13	1072342	1072788
POPTR_0013s01860	scaffold_13	1075561	1079383	Formin Homology 2 Domain
POPTR_0013s01870	scaffold_13	1080643	1083724	Hsp70 protein
POPTR_0013s01880	scaffold_13	1089954	1090806	SRF-type transcription factor (DNA-binding and dimerisation domain)
POPTR_0013s01890	scaffold_13	1095985	1097096	Core histone H2A/H2B/H3/H4
POPTR_0013s01900	scaffold_13	1097556	1101287	Trypsin
POPTR_0013s01910	scaffold_13	1102818	1105808	WD domain, G-beta repeat
POPTR_0013s01920	scaffold_13	1108657	1108860
POPTR_0013s01930	scaffold_13	1112945	1114097	C2 domain
POPTR_0013s01940	scaffold_13	1115443	1120378	PWWP domain
POPTR_0013s01950	scaffold_13	1121864	1129544	Acyl CoA binding protein
POPTR_0013s01960	scaffold_13	1130307	1130805
POPTR_0013s01970	scaffold_13	1139782	1145806	WRC
POPTR_0013s01980	scaffold_13	1145983	1146938
POPTR_0013s01990	scaffold_13	1147862	1150504	Zinc-finger double-stranded RNA-binding
POPTR_0013s02000	scaffold_13	1161538	1166990
POPTR_0013s02010	scaffold_13	1172826	1174232	Methyltransferase domain
POPTR_0013s02020	scaffold_13	1180246	1180677	Histone-like transcription factor (CBF/NF-Y) and archaeal histone
POPTR_0013s02030	scaffold_13	1188584	1189033	Histone-like transcription factor (CBF/NF-Y) and archaeal histone
POPTR_0013s02040	scaffold_13	1192181	1192756
POPTR_0013s02050	scaffold_13	1198236	1203980	PHD-finger
POPTR_0013s02060	scaffold_13	1207582	1211587
POPTR_0013s02070	scaffold_13	1214026	1216019
POPTR_0013s02080	scaffold_13	1219352	1220793
POPTR_0013s02090	scaffold_13	1224930	1233015	CW-type Zinc Finger
POPTR_0013s02100	scaffold_13	1235020	1237205	PCI domain
POPTR_0013s02110	scaffold_13	1251513	1257921	CBS domain
POPTR_0013s02120	scaffold_13	1266819	1278641	Myb-like DNA-binding domain
POPTR_0013s02140	scaffold_13	1284685	1285478
POPTR_0013s02150	scaffold_13	1291326	1295082	Kinesin motor domain
POPTR_0013s02160	scaffold_13	1296945	1300543	Domain of unknown function (DUF1995)
POPTR_0013s02170	scaffold_13	1300961	1304192	Leucine rich repeat N-terminal domain
POPTR_0013s02180	scaffold_13	1305239	1306932	DnaJ domain
POPTR_0013s02190	scaffold_13	1307626	1308057	Leucine Rich Repeat
POPTR_0013s02200	scaffold_13	1309505	1311517	PPR repeat
POPTR_0013s02210	scaffold_13	1312043	1318821	domain
POPTR_0013s02220	scaffold_13	1323964	1332721	AMP-binding enzyme
POPTR_0013s02230	scaffold_13	1333728	1339636	Creatinase/Prolidase N-terminal domain
POPTR_0013s02240	scaffold_13	1340465	1342241
POPTR_0013s02250	scaffold_13	1343281	1344672
POPTR_0013s02260	scaffold_13	1347499	1350892	F-box domain
POPTR_0013s02270	scaffold_13	1352016	1356221	SNARE associated Golgi protein
POPTR_0013s02280	scaffold_13	1357722	1360343	Protein of unknown function (DUF3223)
POPTR_0013s02290	scaffold_13	1360985	1361781	Cytidylyltransferase
POPTR_0013s02300	scaffold_13	1365570	1370030	PLAT/LH2 domain
POPTR_0013s02310	scaffold_13	1372576	1377374	PLAT/LH2 domain
POPTR_0013s02320	scaffold_13	1378659	1390637	DNA polymerase family B
POPTR_0013s02330	scaffold_13	1391534	1397157	Zn-finger in Ran binding protein and others
POPTR_0013s02340	scaffold_13	1402469	1404171	Protein of unknown function (DUF3223)
POPTR_0013s02350	scaffold_13	1406548	1408625
POPTR_0013s02360	scaffold_13	1409283	1415594	Protein kinase domain
POPTR_0013s02370	scaffold_13	1417447	1419240
POPTR_0013s02380	scaffold_13	1422861	1425074	Glycosyl transferase family 8
POPTR_0013s02390	scaffold_13	1428026	1430075	Cyclin
POPTR_0013s02400	scaffold_13	1429247	1437073	Miro-like protein
POPTR_0013s02410	scaffold_13	1441154	1443792	Mitochondrial carrier protein
POPTR_0013s02420	scaffold_13	1445015	1445720
POPTR_0013s02430	scaffold_13	1446318	1449678	Yip1 domain
POPTR_0013s02440	scaffold_13	1452672	1453212
POPTR_0013s02450	scaffold_13	1456177	1463611
POPTR_0013s02460	scaffold_13	1464353	1465165
POPTR_0013s02470	scaffold_13	1467169	1467510
POPTR_0013s02480	scaffold_13	1469390	1470716	short chain dehydrogenase
POPTR_0013s02490	scaffold_13	1472293	1476109	GHMP kinases N terminal domain
POPTR_0013s02500	scaffold_13	1479542	1482903
POPTR_0013s02510	scaffold_13	1487755	1491272
POPTR_0013s02520	scaffold_13	1493006	1493886	Leucine Rich Repeat
POPTR_0013s02530	scaffold_13	1503335	1505863	NPH3 family
POPTR_0013s02540	scaffold_13	1506749	1507285
POPTR_0013s02550	scaffold_13	1508987	1510455
POPTR_0013s02560	scaffold_13	1515590	1517035
POPTR_0013s02570	scaffold_13	1523900	1525784
POPTR_0013s02580	scaffold_13	1526504	1529323	Core histone H2A/H2B/H3/H4
POPTR_0013s02590	scaffold_13	1532297	1535696	Sodium/calcium exchanger protein
POPTR_0013s02600	scaffold_13	1536624	1540591
POPTR_0013s02610	scaffold_13	1541485	1542791
POPTR_0013s02620	scaffold_13	1548711	1551877	Heavy-metal-associated domain
POPTR_0013s02630	scaffold_13	1563883	1567588	Zinc finger, C3HC4 type (RING finger)
POPTR_0013s02640	scaffold_13	1568575	1568954
POPTR_0013s02650	scaffold_13	1573333	1575850	Glycosyltransferase family 28 C-terminal domain
POPTR_0013s02660	scaffold_13	1577420	1579898	Protein kinase domain
POPTR_0013s02670	scaffold_13	1584938	1586802	Zinc finger, C3HC4 type (RING finger)
POPTR_0013s02680	scaffold_13	1617834	1619651	Helix-loop-helix DNA-binding domain
POPTR_0013s02690	scaffold_13	1626458	1628406	short chain dehydrogenase
POPTR_0013s02710	scaffold_13	1632158	1636284	short chain dehydrogenase
POPTR_0013s02720	scaffold_13	1640545	1643408
POPTR_0013s02730	scaffold_13	1644706	1647641	GDSL-like Lipase/Acylhydrolase
POPTR_0013s02740	scaffold_13	1647668	1650170	Domain of unknown function (DUF477)
POPTR_0013s02750	scaffold_13	1650478	1654078
POPTR_0013s02760	scaffold_13	1660372	1664478	Sodium/hydrogen exchanger family
POPTR_0013s02770	scaffold_13	1666342	1671771	Tim44-like domain
POPTR_0013s02780	scaffold_13	1675017	1679603	Eukaryotic glutathione synthase, ATP binding domain
POPTR_0013s02790	scaffold_13	1680320	1683432	Protein of unknown function (DUF1068)
POPTR_0013s02800	scaffold_13	1688118	1690171	Cytochrome P450
POPTR_0013s02810	scaffold_13	1696661	1698061	Protein of unknown function (DUF3049)
POPTR_0013s02820	scaffold_13	1710628	1711627	Protein of unknown function (DUF679)
POPTR_0013s02830	scaffold_13	1712340	1718660	Leucine Rich Repeat
POPTR_0013s02840	scaffold_13	1720428	1720925
POPTR_0013s02845	scaffold_13	1722656	1723530
POPTR_0013s02850	scaffold_13	1723979	1728867	Major Facilitator Superfamily
POPTR_0013s02860	scaffold_13	1731926	1734054	Ribosomal protein L13e
POPTR_0013s02870	scaffold_13	1734164	1740515	Sugar (and other) transporter
POPTR_0013s02880	scaffold_13	1740617	1748468	Sugar (and other) transporter
POPTR_0013s02890	scaffold_13	1747858	1748568
POPTR_0013s02900	scaffold_13	1751883	1753908	Plectin/S10 domain
POPTR_0013s02910	scaffold_13	1756388	1758115	Protein kinase domain
POPTR_0013s02930	scaffold_13	1765879	1771224	Protein kinase domain
POPTR_0013s02940	scaffold_13	1776688	1782871	WD domain, G-beta repeat
POPTR_0013s02950	scaffold_13	1789856	1791778	Hpt domain
POPTR_0013s02960	scaffold_13	1795296	1797221
POPTR_0013s02970	scaffold_13	1798125	1800720
POPTR_0013s02980	scaffold_13	1803022	1805767	alpha/beta hydrolase fold
POPTR_0013s02990	scaffold_13	1815171	1817328	Core histone H2A/H2B/H3/H4
POPTR_0013s03000	scaffold_13	1818537	1821347
POPTR_0013s03010	scaffold_13	1823444	1831411	C2 domain
POPTR_0013s03020	scaffold_13	1837146	1839469	Development and cell death domain
POPTR_0013s03030	scaffold_13	1842926	1845119	Ribosomal L18p/L5e family
POPTR_0013s03040	scaffold_13	1846868	1850611	DnaJ domain
POPTR_0013s03050	scaffold_13	1854903	1855187
POPTR_0013s03060	scaffold_13	1858495	1861439	Leucine rich repeat N-terminal domain
POPTR_0013s03070	scaffold_13	1868106	1872119	Type I 3-dehydroquinase
POPTR_0013s03080	scaffold_13	1874992	1880410	Type I 3-dehydroquinase
POPTR_0013s03090	scaffold_13	1885359	1885955	Plastocyanin-like domain
POPTR_0013s03100	scaffold_13	1887073	1889854	Leucine Rich Repeat
POPTR_0013s03110	scaffold_13	1895115	1895711	Plastocyanin-like domain
POPTR_0013s03115	scaffold_13	1898361	1898606
POPTR_0013s03120	scaffold_13	1899497	1900167
POPTR_0013s03130	scaffold_13	1904212	1906689	Leucine Rich Repeat
POPTR_0013s03140	scaffold_13	1913310	1915752	Amino acid permease
POPTR_0013s03150	scaffold_13	1918987	1920557	Transport protein particle (TRAPP) component
POPTR_0013s03160	scaffold_13	1923071	1926248	Copper/zinc superoxide dismutase (SODC)
POPTR_0013s03170	scaffold_13	1934197	1937907	Predicted membrane protein
POPTR_0013s03180	scaffold_13	1938344	1940718	Phosphopantetheine attachment site
POPTR_0013s03190	scaffold_13	1949399	1954552	MSP (Major sperm protein) domain
POPTR_0013s03200	scaffold_13	1955640	1956615
POPTR_0013s03210	scaffold_13	1958246	1959223	Domain of unknown function (DUF313)
POPTR_0013s03220	scaffold_13	1961141	1966257	Sodium/hydrogen exchanger family
POPTR_0013s03225	scaffold_13	1975643	1975861
POPTR_0013s03230	scaffold_13	1978373	1979405
POPTR_0013s03240	scaffold_13	1980027	1988757	Exportin 1-like protein
POPTR_0013s03250	scaffold_13	1991152	1997563	Protein kinase domain
POPTR_0013s03260	scaffold_13	1999156	2003174	NOP5NT (NUC127) domain
POPTR_0013s03270	scaffold_13	2009750	2014711	Double-stranded RNA binding motif
POPTR_0013s03280	scaffold_13	2018029	2019617	Putative lysophospholipase
POPTR_0013s03290	scaffold_13	2021025	2022727	PPR repeat
POPTR_0013s03300	scaffold_13	2025163	2026046	S locus-related glycoprotein 1 binding pollen coat protein (SLR1-BP)
POPTR_0013s03310	scaffold_13	2029147	2031272
POPTR_0013s03320	scaffold_13	2029911	2031153
POPTR_0013s03330	scaffold_13	2033118	2042312
POPTR_0013s03340	scaffold_13	2047460	2054744
POPTR_0013s03350	scaffold_13	2056190	2057876	Putative peptidoglycan binding domain
POPTR_0013s03360	scaffold_13	2060496	2068803
POPTR_0013s03365	scaffold_13	2069187	2069511
POPTR_0013s03370	scaffold_13	2084028	2084753
POPTR_0013s03380	scaffold_13	2085550	2086285
POPTR_0013s03390	scaffold_13	2087260	2088700	Tetratricopeptide repeat
POPTR_0013s03400	scaffold_13	2098272	2101220	Cation transporter/ATPase, N-terminus
POPTR_0013s03410	scaffold_13	2107003	2109787	Tesmin/TSO1-like CXC domain
POPTR_0013s03420	scaffold_13	2111464	2113563
POPTR_0013s03430	scaffold_13	2118283	2122568	Ndr family
POPTR_0013s03440	scaffold_13	2127990	2128903	Plant protein of unknown function (DUF868)
POPTR_0013s03450	scaffold_13	2138924	2141176
POPTR_0013s03460	scaffold_13	2143045	2143838
POPTR_0013s03470	scaffold_13	2149098	2154929	Flavin containing amine oxidoreductase
POPTR_0013s03480	scaffold_13	2156074	2156633
POPTR_0013s03490	scaffold_13	2157252	2160432	Leucine Rich Repeat
POPTR_0013s03500	scaffold_13	2174019	2174852
POPTR_0013s03510	scaffold_13	2180697	2183793	NB-ARC domain
POPTR_0013s03520	scaffold_13	2193643	2197269	Leucine Rich Repeat
POPTR_0013s03530	scaffold_13	2215254	2216242	Leucine Rich Repeat
POPTR_0013s03541	scaffold_13	2223563	2226513	Leucine Rich Repeat
POPTR_0013s03550	scaffold_13	2240754	2243332	Leucine Rich Repeat
POPTR_0013s03560	scaffold_13	2257866	2262192	Ndr family
POPTR_0013s03570	scaffold_13	2266758	2269661
POPTR_0013s03580	scaffold_13	2272031	2273163	Tesmin/TSO1-like CXC domain
POPTR_0013s03590	scaffold_13	2282054	2283028	Cation transporter/ATPase, N-terminus
POPTR_0013s03600	scaffold_13	2288276	2288554
POPTR_0013s03610	scaffold_13	2298834	2300155
POPTR_0013s03620	scaffold_13	2304794	2308122	Cation transporter/ATPase, N-terminus
POPTR_0013s03630	scaffold_13	2310805	2314808	Tetratricopeptide repeat
POPTR_0013s03640	scaffold_13	2315708	2317931
POPTR_0013s03650	scaffold_13	2318804	2320274	IQ calmodulin-binding motif
POPTR_0013s03660	scaffold_13	2322372	2329185	Protein kinase domain
POPTR_0013s03670	scaffold_13	2339183	2343309	Alcohol dehydrogenase transcription factor Myb/SANT-like
POPTR_0013s03680	scaffold_13	2349599	2350763	Tim17/Tim22/Tim23 family
POPTR_0013s03690	scaffold_13	2355285	2356802	EGF-like domain
POPTR_0013s03700	scaffold_13	2358513	2359848	Ribose 5-phosphate isomerase A (phosphoriboisomerase A)
POPTR_0013s03710	scaffold_13	2361604	2364871	C-terminal proteasome-interacting domain of thioredoxin-like
POPTR_0013s03720	scaffold_13	2365469	2373415	Transglutaminase-like superfamily
POPTR_0013s03730	scaffold_13	2382385	2383937
POPTR_0013s03740	scaffold_13	2390896	2394411	Aldo/keto reductase family
POPTR_0013s03750	scaffold_13	2399334	2402116	Aldo/keto reductase family
POPTR_0013s03760	scaffold_13	2416876	2419917	Cation transporter/ATPase, N-terminus
POPTR_0013s03770	scaffold_13	2433082	2434973	EF hand
POPTR_0013s03780	scaffold_13	2438188	2439950	Ammonium Transporter Family
POPTR_0013s03790	scaffold_13	2446341	2449581	NAD dependent epimerase/dehydratase family
POPTR_0013s03800	scaffold_13	2464692	2469164	bZIP transcription factor
POPTR_0013s03810	scaffold_13	2471272	2473486
POPTR_0013s03820	scaffold_13	2479204	2483491	mttA/Hcf106 family
POPTR_0013s03830	scaffold_13	2496138	2498211
POPTR_0013s03840	scaffold_13	2499067	2501029	PPR repeat
POPTR_0013s03850	scaffold_13	2501472	2510992	Mediator complex subunit MED14
POPTR_0013s03860	scaffold_13	2516685	2518478	AUX/IAA family
POPTR_0013s03870	scaffold_13	2534586	2537358	AUX/IAA family
POPTR_0013s03880	scaffold_13	2543529	2543897
POPTR_0013s03890	scaffold_13	2550944	2552134	Chitin recognition protein
POPTR_0013s03900	scaffold_13	2555242	2556417	Chitin recognition protein
POPTR_0013s03910	scaffold_13	2558587	2562620	Leucine Rich Repeat
POPTR_0013s03920	scaffold_13	2567820	2569118	Chitin recognition protein
POPTR_0013s03930	scaffold_13	2576014	2581347	Zinc finger, C3HC4 type (RING finger)
POPTR_0013s03940	scaffold_13	2582324	2584835	Prefoldin subunit
POPTR_0013s03950	scaffold_13	2585061	2587139
POPTR_0013s03960	scaffold_13	2588872	2596618	Ankyrin repeat
POPTR_0013s03970	scaffold_13	2601639	2602390	Protein of unknown function (DUF1685)
POPTR_0013s03980	scaffold_13	2605577	2608177	Protein kinase domain
POPTR_0013s03990	scaffold_13	2617154	2619321	Plant zinc cluster domain
POPTR_0013s04000	scaffold_13	2625487	2626471	linker histone H1 and H5 family
POPTR_0013s04010	scaffold_13	2628264	2632678	Targeting protein for Xklp2 (TPX2)
POPTR_0013s04020	scaffold_13	2650570	2652850	Alba
POPTR_0013s04030	scaffold_13	2658723	2665285	KH domain
POPTR_0013s04040	scaffold_13	2666527	2667732	NC domain
POPTR_0013s04050	scaffold_13	2680350	2684202	MuDR family transposase
POPTR_0013s04060	scaffold_13	2692403	2695702	Protein of unknown function, DUF593
POPTR_0013s04070	scaffold_13	2697856	2704271	ATP-grasp domain
POPTR_0013s04080	scaffold_13	2706258	2706972
POPTR_0013s04090	scaffold_13	2718249	2723736	SSXT protein (N-terminal region)
POPTR_0013s04100	scaffold_13	2723786	2724388	VQ motif
POPTR_0013s04110	scaffold_13	2731052	2742537	Myosin N-terminal SH3-like domain
POPTR_0013s04130	scaffold_13	2751038	2758879	Domain of unknown function (DUF296)
POPTR_0013s04140	scaffold_13	2761603	2767611	GAF domain
POPTR_0013s04150	scaffold_13	2765952	2766502
POPTR_0013s04160	scaffold_13	2770017	2775506	Methyltransferase domain
POPTR_0013s04170	scaffold_13	2786503	2788033	Domain of unknown function (DUF296)
POPTR_0013s04180	scaffold_13	2793449	2797892
POPTR_0013s04190	scaffold_13	2798564	2801424	PPR repeat
POPTR_0013s04200	scaffold_13	2801656	2802940
POPTR_0013s04210	scaffold_13	2803935	2805694
POPTR_0013s04220	scaffold_13	2809514	2811782	2OG-Fe(II) oxygenase superfamily
POPTR_0013s04230	scaffold_13	2813519	2815460
POPTR_0013s04240	scaffold_13	2827153	2828110	AP2 domain
POPTR_0013s04250	scaffold_13	2863769	2864179
POPTR_0013s04260	scaffold_13	2866023	2866247
POPTR_0013s04270	scaffold_13	2887671	2888051
POPTR_0013s04280	scaffold_13	2893255	2893746
POPTR_0013s04290	scaffold_13	2895271	2896124
POPTR_0013s04300	scaffold_13	2898514	2902454	ASCH domain
POPTR_0013s04310	scaffold_13	2916662	2918452	Calcineurin-like phosphoesterase
POPTR_0013s04315	scaffold_13	2919500	2919757
POPTR_0013s04320	scaffold_13	2928432	2930205	Protein kinase domain
POPTR_0013s04330	scaffold_13	2942579	2947539
POPTR_0013s04340	scaffold_13	2948258	2955677	Myb-like DNA-binding domain
POPTR_0013s04350	scaffold_13	2958613	2963046	Beta-eliminating lyase
POPTR_0013s04360	scaffold_13	2977995	2978767	Protein of unknown function (DUF640)
POPTR_0013s04370	scaffold_13	2994593	3003958	jmjN domain
POPTR_0013s04380	scaffold_13	3013173	3014842
POPTR_0013s04390	scaffold_13	3016016	3019614	RNA recognition motif. (a.k.a. RRM, RBD, or RNP domain)
POPTR_0013s04400	scaffold_13	3022315	3022533
POPTR_0013s04410	scaffold_13	3022601	3024268	PPR repeat
POPTR_0013s04420	scaffold_13	3025684	3031108	Protein prenyltransferase alpha subunit repeat
POPTR_0013s04430	scaffold_13	3031316	3036803	Protein kinase domain
POPTR_0013s04450	scaffold_13	3041669	3051753	EF hand
POPTR_0013s04460	scaffold_13	3053627	3059297	ATP-binding region
POPTR_0013s04470	scaffold_13	3066231	3071341	Ankyrin repeat
POPTR_0013s04480	scaffold_13	3074321	3078706
POPTR_0013s04490	scaffold_13	3085926	3087624
POPTR_0013s04500	scaffold_13	3088430	3093473	Pex2 / Pex12 amino terminal region
POPTR_0013s04510	scaffold_13	3096678	3098635	ATPase family associated with various cellular activities (AAA)
POPTR_0013s04520	scaffold_13	3100495	3103035	ATPase family associated with various cellular activities (AAA)
POPTR_0013s04530	scaffold_13	3106871	3111919	Myb-like DNA-binding domain
POPTR_0013s04540	scaffold_13	3115333	3116319
POPTR_0013s04550	scaffold_13	3118380	3120223	SET domain
POPTR_0013s04560	scaffold_13	3121404	3124595	WIYLD domain
POPTR_0013s04570	scaffold_13	3131182	3132624	Domain of unknown function DUF26
POPTR_0013s04580	scaffold_13	3141526	3145097	Plant protein of unknown function (DUF946)
POPTR_0013s04590	scaffold_13	3146276	3148388	C2 domain
POPTR_0013s04610	scaffold_13	3151362	3168220	SNF2 family N-terminal domain
POPTR_0013s04620	scaffold_13	3170982	3185437	ATPase family associated with various cellular activities (AAA)
POPTR_0013s04630	scaffold_13	3185517	3189246	Leucine rich repeat N-terminal domain
POPTR_0013s04640	scaffold_13	3194791	3196954	WD domain, G-beta repeat
POPTR_0013s04650	scaffold_13	3198010	3198654
POPTR_0013s04660	scaffold_13	3202681	3207627	Glycosyl transferase family 8
POPTR_0013s04670	scaffold_13	3209093	3210662
POPTR_0013s04680	scaffold_13	3218092	3221957
POPTR_0013s04690	scaffold_13	3224630	3226221
POPTR_0013s04700	scaffold_13	3240140	3241501	Lung seven transmembrane receptor
POPTR_0013s04710	scaffold_13	3246727	3248127	Ammonium Transporter Family
POPTR_0013s04720	scaffold_13	3254136	3255902
POPTR_0013s04730	scaffold_13	3257512	3260816	Exosome component EXOSC1/CSL4
POPTR_0013s04740	scaffold_13	3266334	3267582
POPTR_0013s04750	scaffold_13	3270508	3271360	Ran-interacting Mog1 protein
POPTR_0013s04760	scaffold_13	3272683	3273644
POPTR_0013s04770	scaffold_13	3274607	3278973	Arabidopsis proteins of unknown function
POPTR_0013s04780	scaffold_13	3294496	3297506	GDSL-like Lipase/Acylhydrolase
POPTR_0013s04790	scaffold_13	3303876	3306355	GDSL-like Lipase/Acylhydrolase
POPTR_0013s04800	scaffold_13	3310939	3330602	Cytoplasmic Fragile-X interacting family
POPTR_0013s04810	scaffold_13	3335422	3340057	Leucine rich repeat N-terminal domain
POPTR_0013s04820	scaffold_13	3344286	3354507	Tetratricopeptide repeat
POPTR_0013s04830	scaffold_13	3361661	3365524	ATP synthase (E/31 kDa) subunit
POPTR_0013s04840	scaffold_13	3367690	3368521	Cupin
POPTR_0013s04850	scaffold_13	3375959	3376790	Cupin
POPTR_0013s04860	scaffold_13	3382031	3382336
POPTR_0013s04870	scaffold_13	3389713	3390650	Cupin
POPTR_0013s04880	scaffold_13	3394645	3395429	Cupin
POPTR_0013s04890	scaffold_13	3406041	3406556	Zinc knuckle
POPTR_0013s04900	scaffold_13	3415429	3417636	U-box domain
POPTR_0013s04910	scaffold_13	3421911	3422626	Cupin
POPTR_0013s04920	scaffold_13	3435122	3436086	Cupin
POPTR_0013s04930	scaffold_13	3444398	3446836	U-box domain
POPTR_0013s04940	scaffold_13	3455463	3457447
POPTR_0013s04950	scaffold_13	3466850	3471364
POPTR_0013s04960	scaffold_13	3490498	3490851
POPTR_0013s04970	scaffold_13	3504605	3506086	Pyridoxal-dependent decarboxylase conserved domain
POPTR_0013s04980	scaffold_13	3518787	3520274	Pyridoxal-dependent decarboxylase conserved domain
POPTR_0013s04990	scaffold_13	3523783	3526406	Protein kinase domain
POPTR_0013s05000	scaffold_13	3535357	3538941	Violaxanthin de-epoxidase (VDE)
POPTR_0013s05010	scaffold_13	3539300	3540904	Syntaxin
POPTR_0013s05020	scaffold_13	3545333	3546657	F-box domain
POPTR_0013s05030	scaffold_13	3549017	3551903
POPTR_0013s05040	scaffold_13	3555464	3560804	GDA1/CD39 (nucleoside phosphatase) family
POPTR_0013s05050	scaffold_13	3562634	3564518	PPR repeat
POPTR_0013s05060	scaffold_13	3577124	3579667
POPTR_0013s05070	scaffold_13	3590708	3591588
POPTR_0013s05080	scaffold_13	3595079	3597093	No apical meristem (NAM) protein
POPTR_0013s05090	scaffold_13	3602489	3603458
POPTR_0013s05100	scaffold_13	3605805	3606990
POPTR_0013s05110	scaffold_13	3620654	3622691	No apical meristem (NAM) protein
POPTR_0013s05120	scaffold_13	3633954	3638517	RNA recognition motif. (a.k.a. RRM, RBD, or RNP domain)
POPTR_0013s05130	scaffold_13	3638899	3641196	PPR repeat
POPTR_0013s05140	scaffold_13	3645316	3645937	Plastocyanin-like domain
POPTR_0013s05150	scaffold_13	3646918	3647330	Auxin responsive protein
POPTR_0013s05160	scaffold_13	3650242	3650940	Hsp20/alpha crystallin family
POPTR_0013s05170	scaffold_13	3653281	3654112	Hsp20/alpha crystallin family
POPTR_0013s05180	scaffold_13	3662990	3664596	Annexin
POPTR_0013s05190	scaffold_13	3674021	3679251	RNA recognition motif. (a.k.a. RRM, RBD, or RNP domain)
POPTR_0013s05200	scaffold_13	3682351	3691425	Ankyrin repeat
POPTR_0013s05210	scaffold_13	3705917	3706127
POPTR_0013s05220	scaffold_13	3715273	3718747	C2 domain
POPTR_0013s05230	scaffold_13	3723779	3728051	Glycosyl hydrolase family 3 N terminal domain
POPTR_0013s05240	scaffold_13	3728782	3730666
POPTR_0013s05250	scaffold_13	3736911	3737708
POPTR_0013s05260	scaffold_13	3740817	3742850
POPTR_0013s05270	scaffold_13	3744800	3745217
POPTR_0013s05280	scaffold_13	3746229	3751254	GDP-fucose protein O-fucosyltransferase
POPTR_0013s05290	scaffold_13	3757542	3758728
POPTR_0013s05300	scaffold_13	3763456	3765144	Myb-like DNA-binding domain
POPTR_0013s05310	scaffold_13	3781220	3782476
POPTR_0013s05320	scaffold_13	3800275	3805996	Importin-beta N-terminal domain
POPTR_0013s05330	scaffold_13	3813813	3814706	AP2 domain
POPTR_0013s05340	scaffold_13	3819586	3823165	Tubulin/FtsZ family, GTPase domain
POPTR_0013s05350	scaffold_13	3826450	3830036	Copper/zinc superoxide dismutase (SODC)
POPTR_0013s05360	scaffold_13	3830836	3834122	Eukaryotic initiation factor 4E
POPTR_0013s05370	scaffold_13	3839179	3841132
POPTR_0013s05380	scaffold_13	3844086	3846236
POPTR_0013s05390	scaffold_13	3845671	3846933
POPTR_0013s05400	scaffold_13	3856552	3856824	Protein of unknown function (DUF1070)
POPTR_0013s05410	scaffold_13	3866399	3869107	Protein of unknown function (DUF1639)
POPTR_0013s05420	scaffold_13	3877410	3882616	Pyridoxamine 5'-phosphate oxidase
POPTR_0013s05430	scaffold_13	3880465	3881562
POPTR_0013s05440	scaffold_13	3892123	3892536
POPTR_0013s05450	scaffold_13	3893359	3896268	Adenylylsulphate kinase
POPTR_0013s05460	scaffold_13	3900769	3903682	DnaJ domain
POPTR_0013s05470	scaffold_13	3903776	3904524
POPTR_0013s05480	scaffold_13	3918157	3922159	Glu/Leu/Phe/Val dehydrogenase, dimerisation domain
POPTR_0013s05490	scaffold_13	3922861	3925280	Gar1/Naf1 RNA binding region
POPTR_0013s05500	scaffold_13	3929600	3934160	TCP-1/cpn60 chaperonin family
POPTR_0013s05510	scaffold_13	3934853	3936589
POPTR_0013s05520	scaffold_13	3938051	3941424
POPTR_0013s05540	scaffold_13	3944553	3949153	PHD-finger
POPTR_0013s05550	scaffold_13	3951007	3953861	PPR repeat
POPTR_0013s05560	scaffold_13	3961034	3962058	short chain dehydrogenase
POPTR_0013s05570	scaffold_13	3972592	3974334	short chain dehydrogenase
POPTR_0013s05580	scaffold_13	3981795	3986795	Transcription factor TFIID (or TATA-binding protein, TBP)
POPTR_0013s05590	scaffold_13	3990701	3997649	HNH endonuclease
POPTR_0013s05610	scaffold_13	4007334	4008975	GATA zinc finger
POPTR_0013s05620	scaffold_13	4017851	4021843	Glycosyl hydrolases family 17
POPTR_0013s05630	scaffold_13	4031892	4043400	Not1 N-terminal domain, CCR4-Not complex component
POPTR_0013s05640	scaffold_13	4051228	4053787	D-mannose binding lectin
POPTR_0013s05650	scaffold_13	4055821	4058184	D-mannose binding lectin
POPTR_0013s05660	scaffold_13	4065777	4067672	Leucine Rich Repeat
POPTR_0013s05670	scaffold_13	4070572	4074060	Myb-like DNA-binding domain
POPTR_0013s05680	scaffold_13	4091620	4099260	Glucosidase II beta subunit-like protein

## Sheet: BM-7
Gene_Name	Chromosome_Name	Gene_Start	Gene_End	PFAM_Description
POPTR_0014s00200	scaffold_14	1310	3969	Leucine Rich Repeat
POPTR_0014s00220	scaffold_14	50523	52183
POPTR_0014s00230	scaffold_14	57162	58649
POPTR_0014s00240	scaffold_14	72729	73049
POPTR_0014s00250	scaffold_14	73369	77146
POPTR_0014s00260	scaffold_14	78492	88446	TAZ zinc finger
POPTR_0014s00270	scaffold_14	89978	95083	Enhancer of polycomb-like
POPTR_0014s00280	scaffold_14	106486	109043	Myb-like DNA-binding domain
POPTR_0014s00290	scaffold_14	113605	116413	Major Facilitator Superfamily
POPTR_0014s00300	scaffold_14	120632	122076
POPTR_0014s00310	scaffold_14	127468	129074	WD domain, G-beta repeat
POPTR_0014s00320	scaffold_14	130069	135049	YT521-B-like family
POPTR_0014s00330	scaffold_14	136441	139919
POPTR_0014s00340	scaffold_14	140956	146026	Leucine rich repeat N-terminal domain
POPTR_0014s00350	scaffold_14	155894	160829	Prenyltransferase and squalene oxidase repeat
POPTR_0014s00360	scaffold_14	181160	185353	Prenyltransferase and squalene oxidase repeat
POPTR_0014s00370	scaffold_14	193072	198686	Prenyltransferase and squalene oxidase repeat
POPTR_0014s00380	scaffold_14	199196	201348	Leucine rich repeat N-terminal domain
POPTR_0014s00390	scaffold_14	211044	212078
POPTR_0014s00400	scaffold_14	212146	212799
POPTR_0014s00410	scaffold_14	219451	223092	NB-ARC domain
POPTR_0014s00415	scaffold_14	248756	251824	NB-ARC domain
POPTR_0014s00420	scaffold_14	259408	260349
POPTR_0014s00430	scaffold_14	290096	293507	NB-ARC domain
POPTR_0014s00440	scaffold_14	322741	326023	NB-ARC domain
POPTR_0014s00450	scaffold_14	364215	367814	NB-ARC domain
POPTR_0014s00460	scaffold_14	370530	372398
POPTR_0014s00470	scaffold_14	377630	381729	NB-ARC domain
POPTR_0014s00480	scaffold_14	382769	384564	Protein tyrosine kinase
POPTR_0014s00490	scaffold_14	386896	391422	Universal stress protein family
POPTR_0014s00500	scaffold_14	407351	411567	NB-ARC domain
POPTR_0014s00510	scaffold_14	435800	439309	NB-ARC domain
POPTR_0014s00520	scaffold_14	445527	445811
POPTR_0014s00530	scaffold_14	464781	465825
POPTR_0014s00532	scaffold_14	478659	480315
POPTR_0014s00534	scaffold_14	485498	486405	Leucine Rich Repeat
POPTR_0014s00536	scaffold_14	486523	487252	Leucine Rich Repeat

## Sheet: BM-8
Gene_Name	Chromosome_Name	Gene_Start	Gene_End	PFAM_Description
POPTR_0017s05440	scaffold_17	4300342	4300578
POPTR_0017s05450	scaffold_17	4309309	4310819	GRAS family transcription factor
POPTR_0017s05460	scaffold_17	4318758	4321115	Ribosomal L38e protein family
POPTR_0017s05470	scaffold_17	4327758	4331105	mce related protein
POPTR_0017s05480	scaffold_17	4339617	4344535	Plant protein of unknown function (DUF936)
POPTR_0017s05490	scaffold_17	4348118	4351870	Calreticulin family
POPTR_0017s05500	scaffold_17	4353379	4357953	Metallo-beta-lactamase superfamily
POPTR_0017s05510	scaffold_17	4364003	4366437	RNA recognition motif. (a.k.a. RRM, RBD, or RNP domain)
POPTR_0017s05520	scaffold_17	4370082	4371353	Caulimovirus viroplasmin
POPTR_0017s05540	scaffold_17	4378114	4379385	Caulimovirus viroplasmin
POPTR_0017s05550	scaffold_17	4384419	4384819
POPTR_0017s05560	scaffold_17	4386221	4386640
POPTR_0017s05570	scaffold_17	4390587	4396154	F-box domain
POPTR_0017s05580	scaffold_17	4394322	4394571
POPTR_0017s05590	scaffold_17	4396540	4397013
POPTR_0017s05600	scaffold_17	4397669	4397818
POPTR_0017s05610	scaffold_17	4399651	4404619	Basic region leucine zipper
POPTR_0017s05620	scaffold_17	4405469	4412875	Electron transfer flavoprotein-ubiquinone oxidoreductase
POPTR_0017s05630	scaffold_17	4416609	4418457	Strictosidine synthase
POPTR_0017s05640	scaffold_17	4421449	4424808	Protein of unknown function (DUF1336)
POPTR_0017s05650	scaffold_17	4425951	4427871	Rhomboid family
POPTR_0017s05660	scaffold_17	4435165	4436060	PRA1 family protein
POPTR_0017s05670	scaffold_17	4439173	4439742
POPTR_0017s05680	scaffold_17	4446519	4448483	Cytochrome P450
POPTR_0017s05690	scaffold_17	4457937	4460116	Cytochrome P450
POPTR_0017s05700	scaffold_17	4467509	4469442	B-box zinc finger
POPTR_0017s05710	scaffold_17	4469721	4471578	Leucine Rich Repeat
POPTR_0017s05720	scaffold_17	4471838	4473802	YIF1
POPTR_0017s05730	scaffold_17	4483633	4484877	Leucine Rich Repeat
POPTR_0017s05740	scaffold_17	4485351	4485677
POPTR_0017s05750	scaffold_17	4487925	4493772	OB-fold nucleic acid binding domain
POPTR_0017s05760	scaffold_17	4495488	4498260
POPTR_0017s05770	scaffold_17	4498579	4501890	pfkB family carbohydrate kinase
POPTR_0017s05780	scaffold_17	4518333	4519981	FAR1 DNA-binding domain
POPTR_0017s05790	scaffold_17	4520851	4524372	Glycoprotease family
POPTR_0017s05800	scaffold_17	4526553	4526969
POPTR_0017s05810	scaffold_17	4528301	4529617	Transferase family
POPTR_0017s05820	scaffold_17	4531196	4532210	FAR1 DNA-binding domain
POPTR_0017s05830	scaffold_17	4537408	4538247	Protein kinase domain
POPTR_0017s05840	scaffold_17	4541374	4542230
POPTR_0017s05850	scaffold_17	4545967	4547783
POPTR_0017s05860	scaffold_17	4548759	4549868	EF hand
POPTR_0017s05870	scaffold_17	4556949	4562495
POPTR_0017s05880	scaffold_17	4567767	4570733	Protein kinase domain
POPTR_0017s05890	scaffold_17	4573091	4575395	RNA recognition motif. (a.k.a. RRM, RBD, or RNP domain)
POPTR_0017s05900	scaffold_17	4576123	4576914	GUN4-like
POPTR_0017s05910	scaffold_17	4579177	4579758
POPTR_0017s05920	scaffold_17	4580974	4581858
POPTR_0017s05930	scaffold_17	4584063	4585374
POPTR_0017s05940	scaffold_17	4588028	4589884
POPTR_0017s05950	scaffold_17	4591276	4595016
POPTR_0017s05960	scaffold_17	4597952	4604377	AAA domain (dynein-related subfamily)
POPTR_0017s05970	scaffold_17	4612126	4613313	No apical meristem (NAM) protein
POPTR_0017s05980	scaffold_17	4619206	4620828	Bromodomain
POPTR_0017s05990	scaffold_17	4635767	4638385	Bromodomain
POPTR_0017s06000	scaffold_17	4643361	4644549	No apical meristem (NAM) protein
POPTR_0017s06020	scaffold_17	4666793	4671416
POPTR_0017s06030	scaffold_17	4674827	4682998	Helicase conserved C-terminal domain
POPTR_0017s06040	scaffold_17	4685469	4686006
POPTR_0017s06050	scaffold_17	4686254	4694710	IBR domain
POPTR_0017s06060	scaffold_17	4700407	4701997	PPR repeat
POPTR_0017s06070	scaffold_17	4707863	4713446	Sugar (and other) transporter
POPTR_0017s06080	scaffold_17	4714848	4716688
POPTR_0017s06090	scaffold_17	4727811	4728471
POPTR_0017s06100	scaffold_17	4729398	4730980
POPTR_0017s06110	scaffold_17	4737165	4737798
POPTR_0017s06120	scaffold_17	4738696	4740393
POPTR_0017s06130	scaffold_17	4759969	4763559	Protein of unknown function (DUF1685)
POPTR_0017s06140	scaffold_17	4761156	4763559
POPTR_0017s06150	scaffold_17	4766594	4768356	PPR repeat
POPTR_0017s06160	scaffold_17	4768873	4769516
POPTR_0017s06170	scaffold_17	4774507	4788739	tRNA synthetases class I (I, L, M and V)
POPTR_0017s06180	scaffold_17	4789021	4792811	Radical SAM superfamily
POPTR_0017s06190	scaffold_17	4793223	4796490	RNA recognition motif. (a.k.a. RRM, RBD, or RNP domain)
POPTR_0017s06200	scaffold_17	4798930	4799548
POPTR_0017s06220	scaffold_17	4799925	4804552	AMP-binding enzyme
POPTR_0017s06230	scaffold_17	4807237	4810087
POPTR_0017s06240	scaffold_17	4815763	4818271	BED zinc finger
POPTR_0017s06250	scaffold_17	4820877	4823677	Leucine Rich Repeat
POPTR_0017s06260	scaffold_17	4827572	4828075
POPTR_0017s06270	scaffold_17	4828621	4829448
POPTR_0017s06280	scaffold_17	4831407	4833404	Leucine Rich Repeat
POPTR_0017s06290	scaffold_17	4836063	4836590
POPTR_0017s06300	scaffold_17	4836651	4836995
POPTR_0017s06310	scaffold_17	4837326	4840965	Protein tyrosine kinase
POPTR_0017s06320	scaffold_17	4840242	4840442
POPTR_0017s06330	scaffold_17	4857464	4859696	Protein kinase domain
POPTR_0017s06340	scaffold_17	4866509	4866825
POPTR_0017s06350	scaffold_17	4870299	4872708
POPTR_0017s06360	scaffold_17	4878326	4885528	Nucleotide-sugar transporter
POPTR_0017s06370	scaffold_17	4889728	4890283
POPTR_0017s06380	scaffold_17	4892397	4896038	Got1/Sft2-like family
POPTR_0017s06390	scaffold_17	4897013	4898622	SANTA (SANT Associated)
POPTR_0017s06400	scaffold_17	4899210	4904042	Survival motor neuron (SMN) interacting protein 1 (SIP1)
POPTR_0017s06410	scaffold_17	4913699	4917897	Protein tyrosine kinase
POPTR_0017s06420	scaffold_17	4918760	4925389	PPR repeat
POPTR_0017s06430	scaffold_17	4926068	4932450	UBX domain
POPTR_0017s06440	scaffold_17	4935196	4940367	Raffinose synthase or seed inhibition protein Sip1
POPTR_0017s06450	scaffold_17	4942090	4944143	Ubiquitin-2 like Rad60 SUMO-like
POPTR_0017s06460	scaffold_17	4949910	4952562	Isocitrate lyase family
POPTR_0017s06470	scaffold_17	4957723	4959215	Myb-like DNA-binding domain
POPTR_0017s06480	scaffold_17	4962147	4963008	Translation initiation factor SUI1
POPTR_0017s06490	scaffold_17	4964474	4966117	Arabidopsis thaliana protein of unknown function (DUF794)
POPTR_0017s06500	scaffold_17	4966273	4966476
POPTR_0017s06510	scaffold_17	4967088	4967438
POPTR_0017s06520	scaffold_17	4969799	4970372	Ubiquitin family
POPTR_0017s06530	scaffold_17	4970882	4971634	Ubiquitin family
POPTR_0017s06540	scaffold_17	4979578	4982548	Zinc finger, C3HC4 type (RING finger)
POPTR_0017s06550	scaffold_17	4985507	4986903	Peroxidase
POPTR_0017s06560	scaffold_17	4988245	4988794
POPTR_0017s06570	scaffold_17	4990586	4993351	Peroxidase
POPTR_0017s06580	scaffold_17	5002199	5002605
POPTR_0017s06590	scaffold_17	5002752	5004155	Zinc finger, C3HC4 type (RING finger)
POPTR_0017s06600	scaffold_17	5007503	5012285	TraB family
POPTR_0017s06610	scaffold_17	5014162	5018743	MYND finger
POPTR_0017s06620	scaffold_17	5027188	5031300
POPTR_0017s06630	scaffold_17	5034972	5040593	EXS family
POPTR_0017s06640	scaffold_17	5042235	5080270	AAA domain (dynein-related subfamily)
POPTR_0017s06650	scaffold_17	5092193	5099297	Peptidase family M1
POPTR_0017s06660	scaffold_17	5105782	5107322	B-box zinc finger
POPTR_0017s06670	scaffold_17	5112996	5113832	B-box zinc finger
POPTR_0017s06680	scaffold_17	5117313	5119723	Protein of unknown function, DUF604
POPTR_0017s06690	scaffold_17	5122406	5124140	Protein of unknown function, DUF604
POPTR_0017s06700	scaffold_17	5127184	5127956
POPTR_0017s06710	scaffold_17	5128975	5129586	SRF-type transcription factor (DNA-binding and dimerisation domain)
POPTR_0017s06720	scaffold_17	5131695	5132535	Domain of unknown function DUF26
POPTR_0017s06730	scaffold_17	5145853	5146581	Domain of unknown function DUF26
POPTR_0017s06740	scaffold_17	5149132	5149701
POPTR_0017s06750	scaffold_17	5154428	5155228	Domain of unknown function DUF26
POPTR_0017s06760	scaffold_17	5179622	5180359	Domain of unknown function DUF26
POPTR_0017s06770	scaffold_17	5183087	5183824	Domain of unknown function DUF26
POPTR_0017s06780	scaffold_17	5184908	5185162
POPTR_0017s06790	scaffold_17	5186906	5187634	Domain of unknown function DUF26
POPTR_0017s06800	scaffold_17	5188482	5189081	SRF-type transcription factor (DNA-binding and dimerisation domain)
POPTR_0017s06810	scaffold_17	5192102	5192713	SRF-type transcription factor (DNA-binding and dimerisation domain)
POPTR_0017s06820	scaffold_17	5202102	5202740
POPTR_0017s06830	scaffold_17	5213675	5214040
POPTR_0017s06840	scaffold_17	5218996	5221534	Glycosyl hydrolase family 14
POPTR_0017s06850	scaffold_17	5223946	5225042	Protein of unknown function (DUF1218)
POPTR_0017s06860	scaffold_17	5227392	5228385	Helix-loop-helix DNA-binding domain
POPTR_0017s06870	scaffold_17	5229053	5241549	SET domain
POPTR_0017s06880	scaffold_17	5255347	5259894
POPTR_0017s06890	scaffold_17	5260770	5261135
POPTR_0017s06900	scaffold_17	5279761	5281543	GRAS family transcription factor
POPTR_0017s06910	scaffold_17	5291263	5294465	NPH3 family
POPTR_0017s06920	scaffold_17	5302805	5306486	Terpene synthase, N-terminal domain
POPTR_0017s06925	scaffold_17	5305010	5305677
POPTR_0017s06930	scaffold_17	5319577	5329759	Dynamin family
POPTR_0017s06940	scaffold_17	5331288	5332661
POPTR_0017s06950	scaffold_17	5339713	5340207
POPTR_0017s06960	scaffold_17	5418911	5422482	PPR repeat
POPTR_0017s06970	scaffold_17	5423174	5428505	tify domain
POPTR_0017s06980	scaffold_17	5435324	5435673	GATA zinc finger
POPTR_0017s06990	scaffold_17	5444881	5445096
POPTR_0017s07000	scaffold_17	5449161	5454218	KH domain
POPTR_0017s07010	scaffold_17	5461971	5463260
POPTR_0017s07020	scaffold_17	5466523	5467095
POPTR_0017s07030	scaffold_17	5468395	5469938
POPTR_0017s07040	scaffold_17	5471772	5474455	Fructose-1-6-bisphosphatase
POPTR_0017s07050	scaffold_17	5475703	5481775	Nuf2 family
POPTR_0017s07060	scaffold_17	5482828	5490532	UvrB/uvrC motif
POPTR_0017s07070	scaffold_17	5496617	5498887
POPTR_0017s07080	scaffold_17	5499143	5499514	Auxin responsive protein
POPTR_0017s07090	scaffold_17	5501308	5501891	Auxin responsive protein
POPTR_0017s07100	scaffold_17	5505593	5506205	Auxin responsive protein
POPTR_0017s07110	scaffold_17	5516330	5516776	Auxin responsive protein
POPTR_0017s07120	scaffold_17	5517482	5517920
POPTR_0017s07130	scaffold_17	5518552	5520474
POPTR_0017s07140	scaffold_17	5529449	5535261
POPTR_0017s07150	scaffold_17	5544147	5546223	GDP dissociation inhibitor
POPTR_0017s07160	scaffold_17	5547964	5549608	K-box region
POPTR_0017s07170	scaffold_17	5557162	5558254	SRF-type transcription factor (DNA-binding and dimerisation domain)
POPTR_0017s07190	scaffold_17	5577015	5581002	GDP dissociation inhibitor
POPTR_0017s07200	scaffold_17	5584475	5586056	K-box region
POPTR_0017s07205	scaffold_17	5593325	5594683	SRF-type transcription factor (DNA-binding and dimerisation domain)
POPTR_0017s07210	scaffold_17	5604566	5609445	DnaJ domain
POPTR_0017s07220	scaffold_17	5619811	5623658	Carbonic anhydrase
POPTR_0017s07230	scaffold_17	5624709	5625452
POPTR_0017s07240	scaffold_17	5626167	5627274
POPTR_0017s07250	scaffold_17	5627545	5628871	Mitochondrial carrier protein
POPTR_0017s07260	scaffold_17	5634566	5635896	Mitochondrial carrier protein
POPTR_0017s07270	scaffold_17	5639571	5640874	Mitochondrial carrier protein
POPTR_0017s07280	scaffold_17	5643234	5644775	Mitochondrial carrier protein
POPTR_0017s07290	scaffold_17	5651177	5651829
POPTR_0017s07300	scaffold_17	5652521	5652778
POPTR_0017s07310	scaffold_17	5655967	5656456
POPTR_0017s07320	scaffold_17	5673284	5673884
POPTR_0017s07330	scaffold_17	5684270	5684565
POPTR_0017s07340	scaffold_17	5688269	5688607
POPTR_0017s07350	scaffold_17	5703416	5708894	Lipoxygenase
POPTR_0017s07360	scaffold_17	5725344	5726680
POPTR_0017s07370	scaffold_17	5749342	5749946
POPTR_0017s07380	scaffold_17	5750696	5750953
POPTR_0017s07390	scaffold_17	5752695	5753224
POPTR_0017s07400	scaffold_17	5754162	5754862
POPTR_0017s07410	scaffold_17	5758599	5759060
POPTR_0017s07420	scaffold_17	5770719	5771033
POPTR_0017s07430	scaffold_17	5781869	5782431
POPTR_0017s07440	scaffold_17	5787869	5788538
POPTR_0017s07450	scaffold_17	5799291	5800039
POPTR_0017s07460	scaffold_17	5801036	5801934	SRF-type transcription factor (DNA-binding and dimerisation domain)
POPTR_0017s07470	scaffold_17	5803537	5803878
POPTR_0017s07480	scaffold_17	5806647	5807434
POPTR_0017s07490	scaffold_17	5813102	5830829	Protein of unknown function (DUF3591)
POPTR_0017s07500	scaffold_17	5833962	5835453
POPTR_0017s07510	scaffold_17	5843071	5844565	Mitochondrial carrier protein
POPTR_0017s07520	scaffold_17	5855205	5857228
POPTR_0017s07530	scaffold_17	5865696	5866655
POPTR_0017s07540	scaffold_17	5870475	5874051	NPH3 family
POPTR_0017s07550	scaffold_17	5876828	5877049
POPTR_0017s07560	scaffold_17	5888159	5889982
POPTR_0017s07570	scaffold_17	5890823	5895166	Protein kinase domain
POPTR_0017s07580	scaffold_17	5898197	5900266	PPR repeat
POPTR_0017s07590	scaffold_17	5904601	5905611	D123
POPTR_0017s07600	scaffold_17	5912436	5914452	2OG-Fe(II) oxygenase superfamily
POPTR_0017s07610	scaffold_17	5916731	5918518	Triose-phosphate Transporter family
POPTR_0017s07620	scaffold_17	5924461	5926565	2OG-Fe(II) oxygenase superfamily
POPTR_0017s07630	scaffold_17	5935707	5938002	2OG-Fe(II) oxygenase superfamily
POPTR_0017s07640	scaffold_17	5940566	5943956	MATH domain
POPTR_0017s07650	scaffold_17	5946342	5947866	FANCL C-terminal domain
POPTR_0017s07660	scaffold_17	5951812	5952541
POPTR_0017s07670	scaffold_17	5959510	5960581
POPTR_0017s07680	scaffold_17	5961404	5969550	Helicase conserved C-terminal domain
POPTR_0017s07690	scaffold_17	5977444	5977761
POPTR_0017s07700	scaffold_17	5981451	5982069
POPTR_0017s07710	scaffold_17	5987080	5991780	3,4-dihydroxy-2-butanone 4-phosphate synthase
POPTR_0017s07720	scaffold_17	6009057	6014341	Sodium:sulfate symporter transmembrane region
POPTR_0017s07740	scaffold_17	6017245	6020505	Leucine rich repeat N-terminal domain
POPTR_0017s07750	scaffold_17	6026410	6028416	Leucine rich repeat N-terminal domain
POPTR_0017s07760	scaffold_17	6033259	6037506	Splicing factor 3B subunit 1
POPTR_0017s07770	scaffold_17	6038726	6042403	UbiA prenyltransferase family
POPTR_0017s07780	scaffold_17	6050337	6050771
POPTR_0017s07790	scaffold_17	6053064	6055447	ABC transporter
POPTR_0017s07800	scaffold_17	6073902	6075045	Pathogenesis-related protein Bet v I family
POPTR_0017s07810	scaffold_17	6100441	6101572	Pathogenesis-related protein Bet v I family
POPTR_0017s07820	scaffold_17	6124396	6127218	ABC transporter
POPTR_0017s07830	scaffold_17	6127832	6128170
POPTR_0017s07840	scaffold_17	6132616	6137312	SAICAR synthetase
POPTR_0017s07850	scaffold_17	6145053	6147945	RNA recognition motif. (a.k.a. RRM, RBD, or RNP domain)
POPTR_0017s07860	scaffold_17	6148569	6150505	Phosphate-induced protein 1 conserved region
POPTR_0017s07870	scaffold_17	6180652	6184196	2-nitropropane dioxygenase
POPTR_0017s07875	scaffold_17	6191207	6191488
POPTR_0017s07880	scaffold_17	6193877	6195541
POPTR_0017s07890	scaffold_17	6237665	6239530
POPTR_0017s07900	scaffold_17	6256486	6258118
POPTR_0017s07910	scaffold_17	6270196	6271894
POPTR_0017s07920	scaffold_17	6281656	6283308
POPTR_0017s07930	scaffold_17	6302226	6303882	UDP-glucoronosyl and UDP-glucosyl transferase
POPTR_0017s07940	scaffold_17	6321708	6323298
POPTR_0017s07950	scaffold_17	6334351	6336856	Plant transposase (Ptta/En/Spm family)
POPTR_0017s07960	scaffold_17	6340924	6341142
POPTR_0017s07970	scaffold_17	6363312	6364687	Auxin responsive protein
POPTR_0017s07980	scaffold_17	6390123	6392318	LSD1 zinc finger
POPTR_0017s07990	scaffold_17	6399070	6399270
POPTR_0017s08000	scaffold_17	6413502	6415290	Caspase domain
POPTR_0017s08010	scaffold_17	6421704	6423102	Caspase domain
POPTR_0017s08020	scaffold_17	6439452	6441244	LSD1 zinc finger
POPTR_0017s08030	scaffold_17	6442019	6444461
POPTR_0017s08040	scaffold_17	6446910	6448271
POPTR_0017s08050	scaffold_17	6455429	6457853
POPTR_0017s08060	scaffold_17	6463304	6466049	Aminotransferase class-III
POPTR_0017s08070	scaffold_17	6468565	6471075	CBS domain
POPTR_0017s08080	scaffold_17	6485793	6487955
POPTR_0017s08090	scaffold_17	6488992	6489955	AP2 domain
POPTR_0017s08100	scaffold_17	6502265	6503566
POPTR_0017s08110	scaffold_17	6507637	6512145
POPTR_0017s08120	scaffold_17	6535586	6539095	Cyclin-dependent kinase inhibitor
POPTR_0017s08140	scaffold_17	6567984	6570604	Cytochrome b5-like Heme/Steroid binding domain
POPTR_0017s08150	scaffold_17	6592716	6599030	Proteasome/cyclosome repeat
POPTR_0017s08160	scaffold_17	6603650	6605240	Helix-loop-helix DNA-binding domain
POPTR_0017s08170	scaffold_17	6630213	6632273	Ribosomal protein L13
POPTR_0017s08180	scaffold_17	6633195	6635439	Pectinesterase
POPTR_0017s08190	scaffold_17	6651231	6655619	Myb-like DNA-binding domain
POPTR_0017s08200	scaffold_17	6657700	6658736	EF hand
POPTR_0017s08210	scaffold_17	6659039	6661617	Protein kinase domain
POPTR_0017s08220	scaffold_17	6675521	6680047	Protein of unknown function, DUF593
POPTR_0017s08230	scaffold_17	6686613	6690888	ARID/BRIGHT DNA binding domain
POPTR_0017s08240	scaffold_17	6692820	6694047	Ubiquitin-conjugating enzyme
POPTR_0017s08250	scaffold_17	6722433	6724082	AP2 domain
POPTR_0017s08260	scaffold_17	6732684	6733614	4F5 protein family
POPTR_0017s08270	scaffold_17	6743254	6747404	Zn-finger in ubiquitin-hydrolases and other protein
POPTR_0017s08280	scaffold_17	6753385	6754455	X8 domain
POPTR_0017s08290	scaffold_17	6756550	6756885
POPTR_0017s08300	scaffold_17	6757649	6762252	Calcineurin-like phosphoesterase
POPTR_0017s08310	scaffold_17	6767761	6772054	Calcineurin-like phosphoesterase
POPTR_0017s08320	scaffold_17	6786130	6787038	ER lumen protein retaining receptor
POPTR_0017s08330	scaffold_17	6822838	6824809	Leucine Rich Repeat
POPTR_0017s08340	scaffold_17	6856797	6858725	Paired amphipathic helix repeat
POPTR_0017s08350	scaffold_17	6861697	6865604
POPTR_0017s08360	scaffold_17	6868245	6878197
POPTR_0017s08370	scaffold_17	6884472	6889191
POPTR_0017s08380	scaffold_17	6893553	6899193	UBA/TS-N domain
POPTR_0017s08385	scaffold_17	6908808	6913458
POPTR_0017s08390	scaffold_17	6921157	6927280	TBC domain
POPTR_0017s08400	scaffold_17	6922059	6922259
POPTR_0017s08410	scaffold_17	6927675	6932238	GDP-fucose protein O-fucosyltransferase
POPTR_0017s08420	scaffold_17	6938527	6938799
POPTR_0017s08430	scaffold_17	6958144	6961952	ARP2/3 complex 20 kDa subunit (ARPC4)
POPTR_0017s08440	scaffold_17	6967021	6972166	Alkaline phytoceramidase (aPHC)
POPTR_0017s08443	scaffold_17	6988109	6989797	Zinc knuckle
POPTR_0017s08446	scaffold_17	6991755	6993032
POPTR_0017s08450	scaffold_17	7000368	7006349	tRNA synthetases class I (M)
POPTR_0017s08460	scaffold_17	7019807	7025660	Fungal protein of unknown function (DUF1752)
POPTR_0017s08470	scaffold_17	7045625	7058925	Glycosyl hydrolases family 35
POPTR_0017s08480	scaffold_17	7060721	7061803	F-box domain
POPTR_0017s08490	scaffold_17	7065485	7066711	No apical meristem (NAM) protein
POPTR_0017s08500	scaffold_17	7074042	7075626
POPTR_0017s08510	scaffold_17	7085980	7090750	Filamin/ABP280 repeat
POPTR_0017s08520	scaffold_17	7096348	7097970	DnaJ domain
POPTR_0017s08530	scaffold_17	7107809	7113351
POPTR_0017s08540	scaffold_17	7110293	7110591
POPTR_0017s08550	scaffold_17	7130228	7132712
POPTR_0017s08560	scaffold_17	7142858	7144005	F-box domain
POPTR_0017s08570	scaffold_17	7154658	7157431	RNA recognition motif. (a.k.a. RRM, RBD, or RNP domain)
POPTR_0017s08580	scaffold_17	7182250	7183840	NAD dependent epimerase/dehydratase family
POPTR_0017s08590	scaffold_17	7200241	7203606	3'-5' exonuclease
POPTR_0017s08600	scaffold_17	7212912	7215754	Serine hydroxymethyltransferase
POPTR_0017s08610	scaffold_17	7232201	7234744	S-adenosyl-L-homocysteine hydrolase
POPTR_0017s08620	scaffold_17	7243315	7244520	Rapid ALkalinization Factor (RALF)
POPTR_0017s08630	scaffold_17	7247284	7250203	HSF-type DNA-binding
POPTR_0017s08650	scaffold_17	7277745	7278173
POPTR_0017s08660	scaffold_17	7306210	7307335	Rapid ALkalinization Factor (RALF)
POPTR_0017s08670	scaffold_17	7308410	7308772	Rapid ALkalinization Factor (RALF)
POPTR_0017s08680	scaffold_17	7309505	7314306	56kDa selenium binding protein (SBP56)
POPTR_0017s08700	scaffold_17	7327142	7342931	AMP-binding enzyme
POPTR_0017s08710	scaffold_17	7347521	7347808	Isy1-like splicing family
POPTR_0017s08720	scaffold_17	7350814	7352680	Glycosyl hydrolases family 17
POPTR_0017s08730	scaffold_17	7352685	7353449
POPTR_0017s08740	scaffold_17	7355070	7355686
POPTR_0017s08750	scaffold_17	7361985	7362506	PPR repeat
POPTR_0017s08760	scaffold_17	7368078	7368636
POPTR_0017s08770	scaffold_17	7369057	7369679
POPTR_0017s08780	scaffold_17	7372691	7376469	Mitochondrial carrier protein
POPTR_0017s08790	scaffold_17	7383711	7385034
POPTR_0017s08800	scaffold_17	7383744	7384124
POPTR_0017s08810	scaffold_17	7386466	7391637	V-ATPase subunit C
POPTR_0017s08820	scaffold_17	7407325	7409914	B3 DNA binding domain
POPTR_0017s08830	scaffold_17	7454666	7455265
POPTR_0017s08840	scaffold_17	7471127	7472777	Histone chaperone domain CHZ
POPTR_0017s08850	scaffold_17	7474473	7475335
POPTR_0017s08860	scaffold_17	7506072	7509551	Leucine Rich Repeat
POPTR_0017s08870	scaffold_17	7510337	7510684
POPTR_0017s08880	scaffold_17	7512728	7513813
POPTR_0017s08890	scaffold_17	7517244	7520560	Translocon-associated protein beta (TRAPB)
POPTR_0017s08900	scaffold_17	7548388	7550967	BRO1-like domain
POPTR_0017s08910	scaffold_17	7551397	7553250	Domain of unknown function (DUF588)
POPTR_0017s08920	scaffold_17	7559994	7565031	alpha/beta hydrolase fold
POPTR_0017s08930	scaffold_17	7575926	7576805
POPTR_0017s08940	scaffold_17	7577071	7578175	Cyclic phosphodiesterase-like protein
POPTR_0017s08950	scaffold_17	7582441	7583010
POPTR_0017s08960	scaffold_17	7589581	7590415
POPTR_0017s08970	scaffold_17	7593560	7595669	Shikimate kinase
POPTR_0017s08980	scaffold_17	7634028	7634342
POPTR_0017s08990	scaffold_17	7641379	7643673	Plant protein of unknown function
POPTR_0017s09000	scaffold_17	7657638	7661808
POPTR_0017s09010	scaffold_17	7662874	7663283
POPTR_0017s09020	scaffold_17	7676785	7677964
POPTR_0017s09030	scaffold_17	7688552	7689823	No apical meristem (NAM) protein
POPTR_0017s09040	scaffold_17	7693795	7694312
POPTR_0017s09050	scaffold_17	7722591	7725253	Glycerophosphoryl diester phosphodiesterase family
POPTR_0017s09060	scaffold_17	7738836	7739840
POPTR_0017s09070	scaffold_17	7740311	7743428	Domain of unknown function DUF26
POPTR_0017s09080	scaffold_17	7759016	7762254	Domain of unknown function DUF26
POPTR_0017s09090	scaffold_17	7769326	7770024	Domain of unknown function DUF26
POPTR_0017s09100	scaffold_17	7776912	7779343	Domain of unknown function DUF26
POPTR_0017s09110	scaffold_17	7782974	7783531	Domain of unknown function (DUF3403)
POPTR_0017s09120	scaffold_17	7787437	7790002	Domain of unknown function DUF26
POPTR_0017s09130	scaffold_17	7801821	7802406	Domain of unknown function (DUF3403)
POPTR_0017s09140	scaffold_17	7804094	7807027	Domain of unknown function DUF26
POPTR_0017s09150	scaffold_17	7812753	7813800	Protein kinase domain
POPTR_0017s09160	scaffold_17	7819595	7822228	Domain of unknown function DUF26
POPTR_0017s09170	scaffold_17	7830563	7833113	Domain of unknown function DUF26
POPTR_0017s09180	scaffold_17	7833658	7837075	Domain of unknown function DUF26
POPTR_0017s09190	scaffold_17	7839782	7840612	Domain of unknown function DUF26
POPTR_0017s09200	scaffold_17	7846074	7846704
POPTR_0017s09210	scaffold_17	7847848	7850434	Domain of unknown function DUF26
POPTR_0017s09220	scaffold_17	7854404	7855024	Domain of unknown function DUF26
POPTR_0017s09230	scaffold_17	7857706	7860008
POPTR_0017s09240	scaffold_17	7872859	7874244	Domain of unknown function DUF26
POPTR_0017s09250	scaffold_17	7876421	7879401	Domain of unknown function DUF26
POPTR_0017s09260	scaffold_17	7882879	7886262	Domain of unknown function DUF26
POPTR_0017s09270	scaffold_17	7901362	7904977	Domain of unknown function DUF26
POPTR_0017s09280	scaffold_17	7915648	7919496	Receptor family ligand binding region
POPTR_0017s09290	scaffold_17	7921555	7921907
POPTR_0017s09300	scaffold_17	7922028	7922628
POPTR_0017s09310	scaffold_17	7924747	7928976	Receptor family ligand binding region
POPTR_0017s09320	scaffold_17	7932219	7932419
POPTR_0017s09330	scaffold_17	7956738	7957868
POPTR_0017s09350	scaffold_17	7963312	7966473	Plant mobile domain
POPTR_0017s09360	scaffold_17	7973527	7976886	Domain of unknown function DUF26
POPTR_0017s09370	scaffold_17	7984650	7984871
POPTR_0017s09375	scaffold_17	7989309	7990285
POPTR_0017s09380	scaffold_17	7991553	7993944	Ligand-gated ion channel
POPTR_0017s09390	scaffold_17	8008852	8009792	Ligand-gated ion channel
POPTR_0017s09400	scaffold_17	8012118	8012902
POPTR_0017s09410	scaffold_17	8014994	8015308
POPTR_0017s09420	scaffold_17	8017375	8021142	Receptor family ligand binding region
POPTR_0017s09430	scaffold_17	8027889	8031964	Receptor family ligand binding region
POPTR_0017s09440	scaffold_17	8051034	8052287
POPTR_0017s09450	scaffold_17	8068652	8069479
POPTR_0017s09460	scaffold_17	8074005	8076051	BED zinc finger
POPTR_0017s09470	scaffold_17	8092625	8093769	GRAS family transcription factor
POPTR_0017s09480	scaffold_17	8107928	8108425
POPTR_0017s09490	scaffold_17	8108573	8110813
POPTR_0017s09500	scaffold_17	8117084	8118207	hAT family dimerisation domain
POPTR_0017s09510	scaffold_17	8130690	8131252
POPTR_0017s09520	scaffold_17	8134069	8135963	Protein kinase domain
POPTR_0017s09530	scaffold_17	8136078	8136362
POPTR_0017s09540	scaffold_17	8157899	8160555	Leucine Rich Repeat
POPTR_0017s09550	scaffold_17	8163885	8166244
POPTR_0017s09560	scaffold_17	8169558	8170714
POPTR_0017s09580	scaffold_17	8205884	8207757	Double-stranded RNA binding motif
POPTR_0017s09590	scaffold_17	8214564	8216516	DHHC zinc finger domain
POPTR_0017s09600	scaffold_17	8223604	8225761
POPTR_0017s09610	scaffold_17	8256056	8257045	Ribonucleotide reductase, small chain
POPTR_0017s09620	scaffold_17	8269087	8271029	CRAL/TRIO, N-terminus
POPTR_0017s09630	scaffold_17	8291969	8292295	SecE/Sec61-gamma subunits of protein translocation complex
POPTR_0017s09640	scaffold_17	8303757	8306095	Peroxidase
POPTR_0017s09650	scaffold_17	8314089	8315523
POPTR_0017s09660	scaffold_17	8324866	8328274	Nodulin-like
POPTR_0017s09670	scaffold_17	8332350	8332812	Protein of unknown function (DUF3339)
POPTR_0017s09680	scaffold_17	8334969	8335847	Protein of unknown function (DUF3339)
POPTR_0017s09690	scaffold_17	8336814	8337427	Protein of unknown function (DUF3339)
POPTR_0017s09700	scaffold_17	8337838	8338420	Protein of unknown function (DUF3339)
POPTR_0017s09710	scaffold_17	8341157	8341366	Protein of unknown function (DUF3339)
POPTR_0017s09720	scaffold_17	8366066	8366450
POPTR_0017s09740	scaffold_17	8376192	8377660
POPTR_0017s09750	scaffold_17	8383772	8385736	WRKY DNA -binding domain
POPTR_0017s09760	scaffold_17	8390275	8395034
POPTR_0017s09780	scaffold_17	8405304	8409600	ABC transporter
POPTR_0017s09790	scaffold_17	8410579	8411619
POPTR_0017s09800	scaffold_17	8421593	8421937
POPTR_0017s09820	scaffold_17	8459442	8461037	TCP family transcription factor
POPTR_0017s09830	scaffold_17	8494138	8502138	GYF domain
POPTR_0017s09840	scaffold_17	8544523	8546829	ab-hydrolase associated lipase region
POPTR_0017s09850	scaffold_17	8564810	8571148	Phosphoribulokinase / Uridine kinase family
POPTR_0017s09870	scaffold_17	8588076	8590432	F-box domain
POPTR_0017s09880	scaffold_17	8593246	8594919
POPTR_0017s09890	scaffold_17	8605737	8607926	SWIB/MDM2 domain
POPTR_0017s09900	scaffold_17	8624459	8627100	Transcription factor e(y)2
POPTR_0017s09910	scaffold_17	8631611	8635651	Development and cell death domain
POPTR_0017s09915	scaffold_17	8678992	8681075
POPTR_0017s09920	scaffold_17	8683621	8684695
POPTR_0017s09930	scaffold_17	8689797	8691799
POPTR_0017s09940	scaffold_17	8704372	8704587
POPTR_0017s09950	scaffold_17	8729672	8730717
POPTR_0017s09960	scaffold_17	8753822	8755173
POPTR_0017s09970	scaffold_17	8797379	8798939	Transferase family
POPTR_0017s09980	scaffold_17	8800998	8802146	Pollen proteins Ole e I like
POPTR_0017s09985	scaffold_17	8803081	8805810
POPTR_0017s09990	scaffold_17	8806575	8806940
POPTR_0017s09995	scaffold_17	8808657	8810897	Zinc knuckle
POPTR_0017s10000	scaffold_17	8814140	8817253	Zinc knuckle
POPTR_0017s10010	scaffold_17	8849141	8850390
POPTR_0017s10020	scaffold_17	8851521	8852870
POPTR_0017s10030	scaffold_17	8863925	8866084	Exo70 exocyst complex subunit
POPTR_0017s10040	scaffold_17	8951788	8954315	Protein kinase domain
POPTR_0017s10050	scaffold_17	9003728	9005635
POPTR_0017s10060	scaffold_17	9038899	9039254
POPTR_0017s10070	scaffold_17	9059850	9062600	mTERF
POPTR_0017s10075	scaffold_17	9111642	9113132
POPTR_0017s10080	scaffold_17	9138537	9140895
POPTR_0017s10090	scaffold_17	9179761	9187682	N terminus of Rad21 / Rec8 like protein
POPTR_0017s10110	scaffold_17	9243516	9243860
POPTR_0017s10113	scaffold_17	9280684	9282832
POPTR_0017s10116	scaffold_17	9317292	9319405
POPTR_0017s10120	scaffold_17	9343213	9345891
POPTR_0017s10130	scaffold_17	9367608	9371878	Ion transport protein
POPTR_0017s10140	scaffold_17	9373404	9375087	DSS1/SEM1 family
POPTR_0017s10150	scaffold_17	9379685	9379966
POPTR_0017s10160	scaffold_17	9403159	9403988	IQ calmodulin-binding motif
POPTR_0017s10170	scaffold_17	9429723	9431540
POPTR_0017s10180	scaffold_17	9432316	9438779	Rubisco LSMT substrate-binding
POPTR_0017s10400	scaffold_17	9626373	9627431
POPTR_0017s10410	scaffold_17	9707999	9711831	PCI domain
POPTR_0017s10420	scaffold_17	9715345	9717448
POPTR_0017s10430	scaffold_17	9744677	9745795
POPTR_0017s10440	scaffold_17	9750221	9751574
POPTR_0017s10450	scaffold_17	9797163	9800782	Ribosomal protein L13
POPTR_0017s10460	scaffold_17	9855129	9856906	GDSL-like Lipase/Acylhydrolase
POPTR_0017s10470	scaffold_17	9876195	9881782	NOT2 / NOT3 / NOT5 family
POPTR_0017s10480	scaffold_17	9912013	9913937	SPFH domain / Band 7 family
POPTR_0017s10490	scaffold_17	9928606	9931005
POPTR_0017s10510	scaffold_17	9954712	9964538	Protein kinase domain
POPTR_0017s10500	scaffold_17	9954785	9955218
POPTR_0017s10540	scaffold_17	9969778	9970421
POPTR_0017s10550	scaffold_17	9994224	9994719
POPTR_0017s10560	scaffold_17	9995507	10000397	Protein of unknown function (DUF707)
POPTR_0017s10570	scaffold_17	10005946	10006711
POPTR_0017s10580	scaffold_17	10012248	10013216
POPTR_0017s10590	scaffold_17	10013400	10014767	RNA recognition motif. (a.k.a. RRM, RBD, or RNP domain)
POPTR_0017s10600	scaffold_17	10038753	10040397	Leucine Rich Repeat
POPTR_0017s10610	scaffold_17	10068909	10069229
POPTR_0017s10620	scaffold_17	10102263	10107485	Protein phosphatase 2A regulatory B subunit (B56 family)
POPTR_0017s10630	scaffold_17	10111403	10117041	Glucose-6-phosphate dehydrogenase, NAD binding domain
POPTR_0017s10650	scaffold_17	10123970	10130454	PQ loop repeat
POPTR_0017s10660	scaffold_17	10131641	10133295
POPTR_0017s10670	scaffold_17	10133937	10145093	XPG N-terminal domain
POPTR_0017s10680	scaffold_17	10165458	10168850	Aldo/keto reductase family
POPTR_0017s10690	scaffold_17	10171843	10173824
POPTR_0017s10700	scaffold_17	10179244	10182076	PPR repeat
POPTR_0017s10710	scaffold_17	10202621	10205322	NAD-dependent glycerol-3-phosphate dehydrogenase N-terminus
POPTR_0017s10720	scaffold_17	10224068	10227228	Mediator complex subunit 28
POPTR_0017s10730	scaffold_17	10241855	10245187	Proteasome subunit
POPTR_0017s10740	scaffold_17	10253020	10256716	Phosphoribulokinase / Uridine kinase family
POPTR_0017s10750	scaffold_17	10265458	10267353
POPTR_0017s10760	scaffold_17	10284347	10290539	WW domain
POPTR_0017s10780	scaffold_17	10301697	10305045	Myb-like DNA-binding domain
POPTR_0017s10790	scaffold_17	10325554	10327646	PPR repeat
POPTR_0017s10800	scaffold_17	10332246	10334126	Universal stress protein family
POPTR_0017s10810	scaffold_17	10343755	10344299	Oleosin
POPTR_0017s10820	scaffold_17	10346907	10350484	WD domain, G-beta repeat
POPTR_0017s10830	scaffold_17	10368702	10373251	Zinc finger C-x8-C-x5-C-x3-H type (and similar)
POPTR_0017s10840	scaffold_17	10383963	10385941
POPTR_0017s10850	scaffold_17	10390152	10391629
POPTR_0017s10860	scaffold_17	10397143	10398920	Zinc finger, C3HC4 type (RING finger)
POPTR_0017s10890	scaffold_17	10452379	10469250	C1-like domain
POPTR_0017s10900	scaffold_17	10484604	10485601
POPTR_0017s10910	scaffold_17	10499411	10501021
POPTR_0017s10920	scaffold_17	10503284	10504286
POPTR_0017s10930	scaffold_17	10517518	10520851	Protein tyrosine kinase
POPTR_0017s10940	scaffold_17	10532981	10535118
POPTR_0017s10950	scaffold_17	10549525	10550899
POPTR_0017s10970	scaffold_17	10551597	10560322	Prenyltransferase and squalene oxidase repeat
POPTR_0017s10980	scaffold_17	10567416	10569179	Exonuclease
POPTR_0017s10990	scaffold_17	10626708	10628321	U-box domain
POPTR_0017s10993	scaffold_17	10634232	10636336
POPTR_0017s10996	scaffold_17	10636836	10638242
POPTR_0017s11000	scaffold_17	10650956	10653585	Arabidopsis proteins of unknown function
POPTR_0017s11010	scaffold_17	10657457	10658292
POPTR_0017s11020	scaffold_17	10675374	10680585	Glycosyl hydrolases family 38 N-terminal domain
POPTR_0017s11030	scaffold_17	10683818	10689893	ABC transporter transmembrane region
POPTR_0017s11040	scaffold_17	10715260	10716273
POPTR_0017s11050	scaffold_17	10717889	10719547
POPTR_0017s11060	scaffold_17	10719942	10723517	Endonuclease/Exonuclease/phosphatase family
POPTR_0017s11070	scaffold_17	10730455	10733184
POPTR_0017s11080	scaffold_17	10736817	10738625	Leucine rich repeat N-terminal domain
POPTR_0017s11090	scaffold_17	10760686	10761289
POPTR_0017s11100	scaffold_17	10768428	10770171
POPTR_0017s11110	scaffold_17	10779669	10780141
POPTR_0017s11120	scaffold_17	10791430	10795722	Protein of unknown function (DUF1336)
POPTR_0017s11130	scaffold_17	10796169	10796785
POPTR_0017s11140	scaffold_17	10797637	10799183	Myb-like DNA-binding domain
POPTR_0017s11150	scaffold_17	10803223	10808225	2OG-Fe(II) oxygenase superfamily
POPTR_0017s11160	scaffold_17	10825719	10829842	Ubiquitin carboxyl-terminal hydrolase, family 1
POPTR_0017s11170	scaffold_17	10830525	10831956	2OG-Fe(II) oxygenase superfamily
POPTR_0017s11180	scaffold_17	10841605	10843918	Protein kinase domain
POPTR_0017s11190	scaffold_17	10852657	10853743	Thaumatin family
POPTR_0017s11200	scaffold_17	10918832	10922921	Core-2/I-Branching enzyme
POPTR_0017s11210	scaffold_17	10926081	10928098	PPR repeat
POPTR_0017s11220	scaffold_17	10929136	10933468
POPTR_0017s11230	scaffold_17	10938574	10941676	Protein of unknown function (DUF569)
POPTR_0017s11240	scaffold_17	10949234	10956570	Metallo-beta-lactamase superfamily
POPTR_0017s11250	scaffold_17	10964836	10970573	Metallo-beta-lactamase superfamily
POPTR_0017s11260	scaffold_17	10991251	10992006
POPTR_0017s11270	scaffold_17	11002685	11005875	Beta-Casp domain
POPTR_0017s11280	scaffold_17	11018024	11036397	Histidine acid phosphatase
POPTR_0017s11290	scaffold_17	11043807	11046588	Transketolase, pyrimidine binding domain
POPTR_0017s11300	scaffold_17	11065847	11066898
POPTR_0017s11310	scaffold_17	11068087	11068959	Thioredoxin
POPTR_0017s11320	scaffold_17	11080278	11083839	Major Facilitator Superfamily
POPTR_0017s11330	scaffold_17	11087969	11088388
POPTR_0017s11340	scaffold_17	11099308	11103071	Uncharacterized ACR, COG1565
POPTR_0017s11350	scaffold_17	11105086	11105998
POPTR_0017s11360	scaffold_17	11112164	11117992	Molybdopterin guanine dinucleotide synthesis protein B
POPTR_0017s11370	scaffold_17	11129121	11134051	Protein kinase domain
POPTR_0017s11380	scaffold_17	11135947	11137642
POPTR_0017s11390	scaffold_17	11139466	11139838
POPTR_0017s11400	scaffold_17	11152085	11154180
POPTR_0017s11405	scaffold_17	11174575	11176033
POPTR_0017s11410	scaffold_17	11178163	11181081	SPFH domain / Band 7 family
POPTR_0017s11420	scaffold_17	11183035	11185537	SPFH domain / Band 7 family
POPTR_0017s11430	scaffold_17	11186057	11189262	Eukaryotic porin
POPTR_0017s11440	scaffold_17	11191413	11193392	Membrane transport protein
POPTR_0017s11450	scaffold_17	11196998	11198786	Pectate lyase, N terminus
POPTR_0017s11460	scaffold_17	11203133	11207886	Structure-specific recognition protein (SSRP1)
POPTR_0017s11470	scaffold_17	11217861	11219775	AP2 domain
POPTR_0017s11480	scaffold_17	11224956	11227236
POPTR_0017s11490	scaffold_17	11230034	11235224	Sec7 domain
POPTR_0017s11500	scaffold_17	11241723	11247491	Sec7 domain
POPTR_0017s11510	scaffold_17	11255195	11256614
POPTR_0017s11520	scaffold_17	11257429	11263106	WD domain, G-beta repeat
POPTR_0017s11530	scaffold_17	11267087	11275292	ATP synthase (C/AC39) subunit
POPTR_0017s11550	scaffold_17	11290068	11291172
POPTR_0017s11560	scaffold_17	11301751	11305183	Protein of unknown function (DUF1637)
POPTR_0017s11570	scaffold_17	11362683	11365382	WRKY DNA -binding domain
POPTR_0017s11590	scaffold_17	11379416	11383715	IQ calmodulin-binding motif
POPTR_0017s11600	scaffold_17	11394173	11398548	Elongation factor Tu GTP binding domain
POPTR_0017s11610	scaffold_17	11405732	11406019	PQQ enzyme repeat
POPTR_0017s11620	scaffold_17	11410504	11412344	Aldose 1-epimerase
POPTR_0017s11630	scaffold_17	11429002	11429655
POPTR_0017s11650	scaffold_17	11436023	11439734	Aldose 1-epimerase
POPTR_0017s11660	scaffold_17	11449933	11453351	Aldose 1-epimerase
POPTR_0017s11670	scaffold_17	11453722	11458032	3-dehydroquinate synthase (EC 4)
POPTR_0017s11680	scaffold_17	11458324	11459248
POPTR_0017s11690	scaffold_17	11466506	11466778
POPTR_0017s11700	scaffold_17	11467143	11467523
POPTR_0017s11710	scaffold_17	11469160	11474166	Nucleosome assembly protein (NAP)
POPTR_0017s11720	scaffold_17	11475292	11475834
POPTR_0017s11730	scaffold_17	11493834	11494787
POPTR_0017s11740	scaffold_17	11502700	11504726	Tubulin/FtsZ family, GTPase domain
POPTR_0017s11750	scaffold_17	11525257	11532736	ABC transporter transmembrane region
POPTR_0017s11760	scaffold_17	11585740	11587013	Helix-loop-helix DNA-binding domain
POPTR_0017s11770	scaffold_17	11616766	11620965	RNA recognition motif. (a.k.a. RRM, RBD, or RNP domain)
POPTR_0017s11780	scaffold_17	11629672	11633934	RNA recognition motif. (a.k.a. RRM, RBD, or RNP domain)
POPTR_0017s11790	scaffold_17	11636786	11638481	Glutaredoxin
POPTR_0017s11800	scaffold_17	11673289	11675506	Homeobox domain
POPTR_0017s11810	scaffold_17	11696347	11697263
POPTR_0017s11820	scaffold_17	11710811	11715194	Helicase conserved C-terminal domain
POPTR_0017s11830	scaffold_17	11727673	11729467	No apical meristem (NAM) protein
POPTR_0017s11840	scaffold_17	11730110	11730504
POPTR_0017s11850	scaffold_17	11738611	11740267	Ribosomal protein L34e
POPTR_0017s11860	scaffold_17	11742916	11746520	Protein of unknown function (DUF1666)
POPTR_0017s11870	scaffold_17	11790372	11791402
POPTR_0017s11880	scaffold_17	11818678	11820549	Myb-like DNA-binding domain
POPTR_0017s11890	scaffold_17	11849251	11849385
POPTR_0017s11900	scaffold_17	11865882	11867237	ZF-HD protein dimerisation region
POPTR_0017s11910	scaffold_17	11899457	11900327
POPTR_0017s11920	scaffold_17	11937716	11939836	ZF-HD protein dimerisation region
POPTR_0017s11930	scaffold_17	11967180	11968185
POPTR_0017s11940	scaffold_17	12026401	12027746	Gibberellin regulated protein
POPTR_0017s11950	scaffold_17	12038373	12048785	RecF/RecN/SMC N terminal domain
POPTR_0017s11960	scaffold_17	12049497	12052785	Major intrinsic protein
POPTR_0017s11970	scaffold_17	12114396	12114750
POPTR_0017s11980	scaffold_17	12128723	12130438	Transmembrane amino acid transporter protein
POPTR_0017s11990	scaffold_17	12136927	12137166
POPTR_0017s12000	scaffold_17	12147325	12149122	Transmembrane amino acid transporter protein
POPTR_0017s12010	scaffold_17	12150726	12151338
POPTR_0017s12020	scaffold_17	12158943	12160512	PPR repeat
POPTR_0017s12030	scaffold_17	12165108	12167694	FtsH Extracellular
POPTR_0017s12040	scaffold_17	12170758	12176709	Starch synthase catalytic domain
POPTR_0017s12050	scaffold_17	12177894	12180829	Protein of unknown function (DUF1666)
POPTR_0017s12060	scaffold_17	12192547	12196243	Domain of unknown function (DUF298)
POPTR_0017s12070	scaffold_17	12212347	12213768
POPTR_0017s12080	scaffold_17	12235318	12238825	Dof domain, zinc finger
POPTR_0017s12090	scaffold_17	12249502	12250537
POPTR_0017s12100	scaffold_17	12255800	12256702	EF hand
POPTR_0017s12110	scaffold_17	12263906	12266349	PPR repeat
POPTR_0017s12120	scaffold_17	12290668	12295828	ABC transporter transmembrane region
POPTR_0017s12130	scaffold_17	12297745	12300702	Biotin/lipoate A/B protein ligase family
POPTR_0017s12140	scaffold_17	12301478	12303379	Myb-like DNA-binding domain
POPTR_0017s12150	scaffold_17	12316428	12318118	Rare lipoprotein A (RlpA)-like double-psi beta-barrel
POPTR_0017s12160	scaffold_17	12325187	12330894	RNA recognition motif. (a.k.a. RRM, RBD, or RNP domain)
POPTR_0017s12170	scaffold_17	12348219	12353297	KH domain
POPTR_0017s12180	scaffold_17	12365435	12366481
POPTR_0017s12190	scaffold_17	12372044	12375811	PPR repeat
POPTR_0017s12200	scaffold_17	12378121	12379761	PPR repeat
POPTR_0017s12210	scaffold_17	12391353	12392955	No apical meristem (NAM) protein
POPTR_0017s12230	scaffold_17	12433229	12435377	Myb-like DNA-binding domain
POPTR_0017s12235	scaffold_17	12467121	12467761
POPTR_0017s12240	scaffold_17	12471935	12476362	Cys/Met metabolism PLP-dependent enzyme
POPTR_0017s12250	scaffold_17	12477385	12480998	SPX domain
POPTR_0017s12260	scaffold_17	12481252	12486499	SPX domain
POPTR_0017s12270	scaffold_17	12490331	12493256	emp24/gp25L/p24 family/GOLD
POPTR_0017s12280	scaffold_17	12493709	12495687	PPR repeat
POPTR_0017s12285	scaffold_17	12504757	12506357
POPTR_0017s12290	scaffold_17	12509636	12512972
POPTR_0017s12295	scaffold_17	12515672	12516757
POPTR_0017s12300	scaffold_17	12523078	12526216
POPTR_0017s12310	scaffold_17	12526585	12526861
POPTR_0017s12320	scaffold_17	12527315	12527917
POPTR_0017s12340	scaffold_17	12531011	12532840	Protein of unknown function (DUF1997)
POPTR_0017s12350	scaffold_17	12533760	12535670	PPR repeat
POPTR_0017s12360	scaffold_17	12539492	12541415	Vesicle transport v-SNARE protein N-terminus
POPTR_0017s12370	scaffold_17	12545465	12546667	AP2 domain
POPTR_0017s12380	scaffold_17	12549298	12555406	Protein kinase domain
POPTR_0017s12390	scaffold_17	12567085	12574071	Protein of unknown function (DUF1336)
POPTR_0017s12400	scaffold_17	12579329	12580070	Domain of unknown function (DUF588)
POPTR_0017s12410	scaffold_17	12584232	12589873	Protein kinase domain
POPTR_0017s12430	scaffold_17	12590806	12596278	WRKY DNA -binding domain
POPTR_0017s12440	scaffold_17	12616842	12618668
POPTR_0017s12450	scaffold_17	12619445	12621045	Plastocyanin-like domain
POPTR_0017s12460	scaffold_17	12628060	12630361	Plastocyanin-like domain
POPTR_0017s12470	scaffold_17	12632938	12637268	Chorismate mutase type II
POPTR_0017s12475	scaffold_17	12634401	12634667
POPTR_0017s12480	scaffold_17	12652214	12658805	Plant protein of unknown function (DUF863)
POPTR_0017s12490	scaffold_17	12659387	12661007
POPTR_0017s12500	scaffold_17	12669901	12672246
POPTR_0017s12510	scaffold_17	12672793	12678625	Protein of unknown function (DUF629)
POPTR_0017s12520	scaffold_17	12680229	12681633
POPTR_0017s12530	scaffold_17	12685040	12692701	Ubiquitin elongating factor core
POPTR_0017s12540	scaffold_17	12710771	12714352	C2 domain of PTEN tumour-suppressor protein
POPTR_0017s12550	scaffold_17	12717753	12722643	Cyclic nucleotide-binding domain
POPTR_0017s12560	scaffold_17	12764833	12765632
POPTR_0017s12570	scaffold_17	12786534	12790554	Cyclic nucleotide-binding domain
POPTR_0017s12580	scaffold_17	12794682	12797768
POPTR_0017s12590	scaffold_17	12798344	12802714
POPTR_0017s12600	scaffold_17	12807997	12811653	Plant calmodulin-binding domain
POPTR_0017s12610	scaffold_17	12813880	12817287
POPTR_0017s12620	scaffold_17	12822794	12826230	PPR repeat
POPTR_0017s12630	scaffold_17	12826813	12833217	Clp amino terminal domain
POPTR_0017s12640	scaffold_17	12842862	12845777
POPTR_0017s12650	scaffold_17	12853194	12860482	Glycosyl transferase family 8
POPTR_0017s12660	scaffold_17	12870903	12871149
POPTR_0017s12670	scaffold_17	12876119	12877252	FAR1 DNA-binding domain
POPTR_0017s12680	scaffold_17	12879300	12881433	BAG domain
POPTR_0017s12700	scaffold_17	12886100	12891412
POPTR_0017s12690	scaffold_17	12886715	12887754
POPTR_0017s12695	scaffold_17	12891667	12892030
POPTR_0017s12710	scaffold_17	12894324	12895943
POPTR_0017s12720	scaffold_17	12898583	12900847	PPR repeat
POPTR_0017s12730	scaffold_17	12901428	12904659	Zinc-finger double-stranded RNA-binding
POPTR_0017s12740	scaffold_17	12912539	12914535	Zinc-finger double-stranded RNA-binding
POPTR_0017s12750	scaffold_17	12917280	12921343	Myb-like DNA-binding domain
POPTR_0017s12760	scaffold_17	12926513	12929116	UDP-glucose/GDP-mannose dehydrogenase family, NAD binding domain
POPTR_0017s12770	scaffold_17	12938463	12941896	Targeting protein for Xklp2 (TPX2)
POPTR_0017s12780	scaffold_17	12950595	12952551	Ribosomal protein S19e
POPTR_0017s12790	scaffold_17	12961634	12963466	F-box domain
POPTR_0017s12800	scaffold_17	12981803	12988126	Insulinase (Peptidase family M16)
POPTR_0017s12810	scaffold_17	12991443	12994350	Biotin-requiring enzyme
POPTR_0017s12820	scaffold_17	12994567	13008986	HEAT repeat
POPTR_0017s12830	scaffold_17	13016368	13017241	Rare lipoprotein A (RlpA)-like double-psi beta-barrel
POPTR_0017s12840	scaffold_17	13024990	13026868
POPTR_0017s12850	scaffold_17	13030720	13031122
POPTR_0017s12860	scaffold_17	13042561	13043991	TFIIB zinc-binding
POPTR_0017s12870	scaffold_17	13045432	13056807	Alpha-amylase C-terminal beta-sheet domain
POPTR_0017s12880	scaffold_17	13057853	13062858	NLE (NUC135) domain
POPTR_0017s12885	scaffold_17	13068534	13068885
POPTR_0017s12890	scaffold_17	13069123	13072336	alpha/beta hydrolase fold
POPTR_0017s12900	scaffold_17	13078020	13078351
POPTR_0017s12910	scaffold_17	13091843	13099347	KH domain
